# Supplementary material
Source: MDPI journal article supplement (https://www.mdpi.com/2073-4352/7/7/218)
Supplement: s1 [file s1]

data_DIHYDROEQUILIN_H22_publ

_pd_block_id
  2017-03-27T12:41|DIHYDROEQUILIN_H22|James_A._Kaduk|11bm

_audit_creation_method  "from EXP file using GSAS2CIF"
_audit_creation_date                   2017-03-27T12:41
_audit_author_name                     "James A. Kaduk"
_audit_update_record
; 2017-03-27T12:41  Initial CIF as created by GSAS2CIF
;

#=============================================================================
# this information describes the project, paper etc. for the CIF             #
# Acta Cryst. Section C papers and editorial correspondence is generated     #
# from the information in this section                                       #
#                                                                            #
#   (from)   CIF submission form for Rietveld refinements (Acta Cryst. C)    #
#                                                 Version 14 December 1998   #
#=============================================================================
# 1. SUBMISSION DETAILS

_publ_contact_author_name            ?   # Name of author for correspondence
_publ_contact_author_address             # Address of author for correspondence
; ?
;
_publ_contact_author_email           ?
_publ_contact_author_fax             ?
_publ_contact_author_phone           ?

_publ_contact_letter
; ?
;

_publ_requested_journal              ?
_publ_requested_coeditor_name        ?
_publ_requested_category             ?   # Acta C: one of CI/CM/CO/FI/FM/FO

#==============================================================================

# 2. PROCESSING SUMMARY (IUCr Office Use Only)

_journal_data_validation_number      ?

_journal_date_recd_electronic        ?
_journal_date_to_coeditor            ?
_journal_date_from_coeditor          ?
_journal_date_accepted               ?
_journal_date_printers_first         ?
_journal_date_printers_final         ?
_journal_date_proofs_out             ?
_journal_date_proofs_in              ?
_journal_coeditor_name               ?
_journal_coeditor_code               ?
_journal_coeditor_notes
; ?
;
_journal_techeditor_code             ?
_journal_techeditor_notes
; ?
;
_journal_coden_ASTM                  ?
_journal_name_full                   ?
_journal_year                        ?
_journal_volume                      ?
_journal_issue                       ?
_journal_page_first                  ?
_journal_page_last                   ?
_journal_paper_category              ?
_journal_suppl_publ_number           ?
_journal_suppl_publ_pages            ?

#==============================================================================

# 3. TITLE AND AUTHOR LIST

_publ_section_title
; ?
;
_publ_section_title_footnote
; ?
;

# The loop structure below should contain the names and addresses of all
# authors, in the required order of publication. Repeat as necessary.

loop_
	_publ_author_name
        _publ_author_footnote
	_publ_author_address
 ?                                   #<--'Last name, first name'
; ?
;
; ?
;

#==============================================================================

# 4. TEXT

_publ_section_synopsis
;  ?
;
_publ_section_abstract
; ?
;
_publ_section_comment
; ?
;
_publ_section_exptl_prep      # Details of the preparation of the sample(s)
                              # should be given here.
; ?
;
_publ_section_exptl_refinement
; ?
;
_publ_section_references
; ?
;
_publ_section_figure_captions
; ?
;
_publ_section_acknowledgements
; ?
;

#=============================================================================
# 5. OVERALL REFINEMENT & COMPUTING DETAILS

_refine_special_details
; ?
;
_pd_proc_ls_special_details
; ?
;

# The following items are used to identify the programs used.
_computing_molecular_graphics     ?
_computing_publication_material   ?

_refine_ls_weighting_scheme       ?
_refine_ls_weighting_details      ?
_refine_ls_hydrogen_treatment     ?
_refine_ls_extinction_method      ?
_refine_ls_extinction_coef        ?
_refine_ls_number_constraints     ?

_refine_ls_restrained_S_all       ?
_refine_ls_restrained_S_obs       ?

#==============================================================================
# 6. SAMPLE PREPARATION DATA

# (In the unusual case where multiple samples are used in a single
#  Rietveld study, this information should be moved into the phase
#  blocks)

# The following three fields describe the preparation of the material.
# The cooling rate is in K/min.  The pressure at which the sample was
# prepared is in kPa.  The temperature of preparation is in K.

_pd_prep_cool_rate                ?
_pd_prep_pressure                 ?
_pd_prep_temperature              ?

_pd_char_colour                   ?       # use ICDD colour descriptions
_refine_ls_shift/su_max                0.05
_refine_ls_shift/su_mean               0.00
_computing_structure_refinement        GSAS
_refine_ls_number_parameters           87
_refine_ls_goodness_of_fit_all         1.49
_refine_ls_number_restraints           63
_refine_ls_matrix_type                 full
#==============================================================================
# 7. CHEMICAL, STRUCTURAL AND CRYSTAL DATA

_pd_char_particle_morphology      ?

_chemical_name_systematic
; ?
;
_chemical_name_common             ?
_chemical_formula_moiety          ?
_chemical_formula_structural      ?
_chemical_formula_analytical      ?
_chemical_melting_point           ?
_chemical_compound_source         ?       # for minerals and
                                          # natural products
_symmetry_space_group_name_Hall   ?

_exptl_crystal_F_000               ?
_exptl_crystal_density_diffrn      ?
_exptl_crystal_density_meas        ?
_exptl_crystal_density_method      ?

_cell_measurement_temperature     ?

_cell_special_details
; ?
;

_geom_special_details             ?

# The following item identifies the program(s) used (if appropriate).
_computing_structure_solution     ?

#==============================================================================

# 8. Phase information from GSAS

_pd_phase_name                         "from C:/zjak01/ICDD_pharma/0174a_2.cif"
_cell_length_a                         6.768729(13)
_cell_length_b                         8.968490(11)
_cell_length_c                         23.39031(5)
_cell_angle_alpha                      90.0
_cell_angle_beta                       90.0
_cell_angle_gamma                      90.0
_cell_volume                           1419.9150(30)
_symmetry_cell_setting                 orthorhombic
_symmetry_space_group_name_H-M         "P 21 21 21"
loop_ _symmetry_equiv_pos_site_id _symmetry_equiv_pos_as_xyz
       1 +x,+y,+z 
       2 +x+1/2,-y+1/2,-z 
       3 -x,+y+1/2,-z+1/2 
       4 -x+1/2,-y,+z+1/2 

# ATOMIC COORDINATES AND DISPLACEMENT PARAMETERS


loop_
      _atom_site_type_symbol
      _atom_site_label
      _atom_site_fract_x
      _atom_site_fract_y
      _atom_site_fract_z
      _atom_site_occupancy
      _atom_site_thermal_displace_type
      _atom_site_U_iso_or_equiv
      _atom_site_symmetry_multiplicity
C 
C1      0.4859(4)    0.4413(4)    0.56932(11)  1.0        Uiso   0.04201(32)   4
C 
C2      0.6295(4)    0.48608(35)  0.52303(9)   1.0        Uiso   0.04201(32)   4
C 
C3      0.55174(33)  0.46570(9)   0.46262(9)   1.0        Uiso   0.04201(32)   4
C 
C4      0.35179(32)  0.43162(10)  0.45232(9)   1.0        Uiso   0.04201(32)   4
C 
C5      0.2049(4)    0.4206(4)    0.50061(12)  1.0        Uiso   0.04201(32)   4
C 
C6      0.2978(4)    0.4147(5)    0.55887(11)  1.0        Uiso   0.04201(32)   4
C 
C7      0.68185(32)  0.47123(10)  0.41664(11)  1.0        Uiso   0.04201(32)   4
C 
C8      0.6177(4)    0.44387(10)  0.36146(11)  1.0        Uiso   0.04201(32)   4
C 
C9      0.4209(4)    0.41030(8)   0.35138(9)   1.0        Uiso   0.04201(32)   4
C 
C10     0.28888(32)  0.40439(9)   0.39683(11)  1.0        Uiso   0.04201(32)   4
C 
C11     0.7160(5)    0.6429(4)    0.53535(13)  1.0        Uiso   0.04201(32)   4
C 
C12     0.8039(4)    0.6529(4)    0.59566(12)  1.0        Uiso   0.04201(32)   4
C 
C13     0.64964(32)  0.61337(26)  0.64122(10)  1.0        Uiso   0.04201(32)   4
C 
C14     0.5740(4)    0.45288(29)  0.62774(11)  1.0        Uiso   0.04201(32)   4
C 
C15     0.4577(4)    0.40859(35)  0.68115(14)  1.0        Uiso   0.04201(32)   4
C 
C16     0.5769(5)    0.4810(4)    0.73029(11)  1.0        Uiso   0.04201(32)   4
C 
C17     0.7297(4)    0.58639(29)  0.70222(11)  1.0        Uiso   0.04201(32)   4
O 
O18     0.3548(4)    0.38262(11)  0.29656(12)  1.0        Uiso   0.0757(8)     4
C 
C19     0.4773(5)    0.7231(4)    0.64263(17)  1.0        Uiso   0.0757(8)     4
O 
O20     0.9228(4)    0.52336(30)  0.70413(12)  1.0        Uiso   0.0757(8)     4
H 
H21     0.11181      0.31597      0.49426      1.0        Uiso   0.0547(4)     4
H 
H22     0.19377      0.38480      0.59544      1.0        Uiso   0.0547(4)     4
H 
H23     0.84427      0.49865      0.42409      1.0        Uiso   0.0547(4)     4
H 
H24     0.72668      0.44895      0.32435      1.0        Uiso   0.0547(4)     4
H 
H25     0.12726      0.37678      0.38811      1.0        Uiso   0.0547(4)     4
H 
H26     0.59376      0.72954      0.53083      1.0        Uiso   0.0547(4)     4
H 
H27     0.83792      0.66848      0.50319      1.0        Uiso   0.0547(4)     4
H 
H28     0.93296      0.57186      0.59954      1.0        Uiso   0.0547(4)     4
H 
H29     0.85931      0.77121      0.60342      1.0        Uiso   0.0547(4)     4
H 
H30     0.45509      0.28215      0.68612      1.0        Uiso   0.0547(4)     4
H 
H31     0.30091      0.45428      0.67802      1.0        Uiso   0.0547(4)     4
H 
H32     0.47247      0.54599      0.75929      1.0        Uiso   0.0547(4)     4
H 
H33     0.65630      0.39110      0.75597      1.0        Uiso   0.0547(4)     4
H 
H34     0.71072      0.37866      0.62726      1.0        Uiso   0.0547(4)     4
H 
H35     0.44430      0.76326      0.59738      1.0        Uiso   0.0984(10)    4
H 
H36     0.51773      0.82254      0.67064      1.0        Uiso   0.0984(10)    4
H 
H37     0.34116      0.66543      0.66092      1.0        Uiso   0.0984(10)    4
H 
H38     0.74839      0.67852      0.72625      1.0        Uiso   0.0984(10)    4
H 
H39     0.38120      0.29030      0.29360      1.0        Uiso   0.0984(10)    4
H 
H40     0.98845      0.53295      0.73489      1.0        Uiso   0.0984(10)    4
H 
H41     0.75916      0.40564      0.52707      1.0        Uiso   0.0575        4
H 
H42     0.10328      0.52195      0.49982      1.0        Uiso   0.0575        4
 
# If you change Z, be sure to change all 3 of the following
_chemical_formula_sum                  "C9 H11 O"
_chemical_formula_weight               135.19
_cell_formula_units_Z                  8

# MOLECULAR GEOMETRY

loop_
      _geom_bond_atom_site_label_1
      _geom_bond_atom_site_label_2
      _geom_bond_distance
      _geom_bond_site_symmetry_1
      _geom_bond_site_symmetry_2
      _geom_bond_publ_flag
  C1        C2              1.5092(14)  .      1_555  N
  C1        C6              1.3183(14)  .      1_555  N
  C1        C14             1.4944(27)  .      1_555  N
  C1        H34             1.9820(28)  .      1_555  N
  C1        H41             2.0673(27)  .      4_665  N
  C2        C1              1.5092(14)  .      1_555  N
  C2        C3              1.5190(14)  .      1_555  N
  C2        C11             1.5501(29)  .      1_555  N
  C2        H41             1.1339(31)  .      4_665  N
  C3        C2              1.5190(14)  .      1_555  N
  C3        C4              1.4082(21)  .      1_555  N
  C3        C7              1.3909(14)  .      1_555  N
  C4        C3              1.4082(21)  .      1_555  N
  C4        C5              1.5082(23)  .      1_555  N
  C4        C10             1.3876(22)  .      1_555  N
  C4        H21             2.0287(21)  .      1_555  N
  C4        H42             1.9931(19)  .      4_565  N
  C5        C4              1.5082(23)  .      1_555  N
  C5        C6              1.5019(24)  .      1_555  N
  C5        H21             1.0822(33)  .      1_555  N
  C5        H22             2.0199(27)  .      1_555  N
  C5        H42               1.168(4)  .      4_565  N
  C6        C1              1.3183(14)  .      1_555  N
  C6        C5              1.5019(24)  .      1_555  N
  C6        H22             1.0289(25)  .      1_555  N
  C7        C3              1.3909(14)  .      1_555  N
  C7        C8              1.3838(23)  .      1_555  N
  C7        H23             1.2055(22)  .      1_555  N
  C8        C7              1.3838(23)  .      1_555  N
  C8        C9              1.3856(22)  .      1_555  N
  C8        H24             1.2738(22)  .      1_555  N
  C9        C8              1.3856(22)  .      1_555  N
  C9        C10             1.3899(22)  .      1_555  N
  C9        O18             1.3808(23)  .      1_555  N
  C9        H25             1.9131(28)  .      1_555  N
  C10       C4              1.3876(22)  .      1_555  N
  C10       C9              1.3899(22)  .      1_555  N
  C10       H25             0.9942(22)  .      1_555  N
  C11       C2              1.5501(29)  .      1_555  N
  C11       C12             1.5336(24)  .      1_555  N
  C11       H26             0.9960(34)  .      1_555  N
  C11       H27             1.1536(34)  .      1_555  N
  C12       C11             1.5336(24)  .      1_555  N
  C12       C13             1.5332(24)  .      1_555  N
  C12       H28             1.1818(33)  .      1_555  N
  C12       H29             1.0545(29)  .      1_555  N
  C13       C12             1.5332(24)  .      1_555  N
  C13       C14             1.5600(22)  .      1_555  N
  C13       C17             1.5454(23)  .      1_555  N
  C13       C19             1.5266(25)  .      1_555  N
  C14       C1              1.4944(27)  .      1_555  N
  C14       C13             1.5600(22)  .      1_555  N
  C14       C15             1.5290(23)  .      1_555  N
  C14       H34             1.0139(26)  .      1_555  N
  C15       C14             1.5290(23)  .      1_555  N
  C15       C16             1.5469(30)  .      1_555  N
  C15       H30             1.0657(27)  .      1_555  N
  C15       H31             1.3169(34)  .      1_555  N
  C15       H33             2.0438(33)  .      1_555  N
  C15       H34             2.0047(31)  .      1_555  N
  C16       C15             1.5469(30)  .      1_555  N
  C16       C17             1.5476(23)  .      1_555  N
  C16       H32               1.273(4)  .      1_555  N
  C16       H33             0.9694(31)  .      1_555  N
  C17       C13             1.5454(23)  .      1_555  N
  C17       C16             1.5476(23)  .      1_555  N
  C17       O20             1.4246(22)  .      1_555  N
  C17       H38             1.0073(25)  .      1_555  N
  C17       H40             1.9128(25)  .      1_555  N
  O18       C9              1.3808(23)  .      1_555  N
  O18       H39             1.3818(10)  .      1_555  N
  O18       H40             2.0162(26)  .      4_664  N
  C19       C13             1.5266(25)  .      1_555  N
  C19       H35               1.056(4)  .      1_555  N
  C19       H36               1.205(4)  .      1_555  N
  C19       H37               1.006(4)  .      1_555  N
  O20       C17             1.4246(22)  .      1_555  N
  O20       H38             1.8966(27)  .      1_555  N
  O20       H40             0.7747(27)  .      1_555  N
  H21       C4              2.0287(21)  .      1_555  N
  H21       C5              1.0822(33)  .      1_555  N
  H21       H42                1.74116  .      4_565  N
  H22       C5              2.0199(27)  .      1_555  N
  H22       C6              1.0289(25)  .      1_555  N
  H23       C7              1.2055(22)  .      1_555  N
  H24       C8              1.2738(22)  .      1_555  N
  H25       C9              1.9131(28)  .      1_555  N
  H25       C10             0.9942(22)  .      1_555  N
  H26       C11             0.9960(34)  .      1_555  N
  H26       H27                 1.7486  .      1_555  N
  H27       C11             1.1536(34)  .      1_555  N
  H27       H26                 1.7486  .      1_555  N
  H28       C12             1.1818(33)  .      1_555  N
  H28       H29                1.75923  .      1_555  N
  H29       C12             1.0545(29)  .      1_555  N
  H29       H28                1.75923  .      1_555  N
  H30       C15             1.0657(27)  .      1_555  N
  H30       H31                1.75349  .      1_555  N
  H31       C15             1.3169(34)  .      1_555  N
  H31       H30                1.75349  .      1_555  N
  H32       C16               1.273(4)  .      1_555  N
  H32       H33                1.75783  .      1_555  N
  H33       C15             2.0438(33)  .      1_555  N
  H33       C16             0.9694(31)  .      1_555  N
  H33       H32                1.75783  .      1_555  N
  H34       C1              1.9820(28)  .      1_555  N
  H34       C14             1.0139(26)  .      1_555  N
  H34       C15             2.0047(31)  .      1_555  N
  H35       C19               1.056(4)  .      1_555  N
  H35       H36                1.77111  .      1_555  N
  H35       H37                1.74977  .      1_555  N
  H36       C19               1.205(4)  .      1_555  N
  H36       H35                1.77111  .      1_555  N
  H36       H37                1.76808  .      1_555  N
  H37       C19               1.006(4)  .      1_555  N
  H37       H35                1.74977  .      1_555  N
  H37       H36                1.76808  .      1_555  N
  H38       C17             1.0073(25)  .      1_555  N
  H38       O20             1.8966(27)  .      1_555  N
  H39       O18             1.3818(10)  .      1_555  N
  H40       C17             1.9128(25)  .      1_555  N
  H40       O18             2.0162(26)  .      4_665  N
  H40       O20             0.7747(27)  .      1_555  N
  H41       C1              2.0673(27)  .      4_664  N
  H41       C2              1.1339(31)  .      4_664  N
  H42       C4              1.9931(19)  .      4_564  N
  H42       C5                1.168(4)  .      4_564  N
  H42       H21                1.74116  .      4_564  N

loop_
      _geom_angle_atom_site_label_1
      _geom_angle_atom_site_label_2
      _geom_angle_atom_site_label_3
      _geom_angle
      _geom_angle_site_symmetry_1
      _geom_angle_site_symmetry_2
      _geom_angle_site_symmetry_3
      _geom_angle_publ_flag
  C2        C1        C6              122.48(21)      1_555  .      1_555  N
  C2        C1        C14             112.38(17)      1_555  .      1_555  N
  C6        C1        C14             124.55(18)      1_555  .      1_555  N
  C1        C2        C3              114.35(19)      1_555  .      1_555  N
  C1        C2        C11             110.56(20)      1_555  .      1_555  N
  C1        C2        H41             101.98(23)      1_555  .      4_665  N
  C3        C2        C11             114.39(20)      1_555  .      1_555  N
  C3        C2        H41             106.50(19)      1_555  .      4_665  N
  C11       C2        H41             108.02(22)      1_555  .      4_665  N
  C2        C3        C4              121.21(15)      1_555  .      1_555  N
  C2        C3        C7              119.71(16)      1_555  .      1_555  N
  C4        C3        C7              118.95(11)      1_555  .      1_555  N
  C3        C4        C5              121.32(11)      1_555  .      1_555  N
  C3        C4        C10             119.55(10)      1_555  .      1_555  N
  C5        C4        C10             119.12(14)      1_555  .      1_555  N
  C4        C5        C6              113.93(16)      1_555  .      1_555  N
  C4        C5        H21             101.84(21)      1_555  .      1_555  N
  C4        C5        H42              95.45(21)      1_555  .      4_565  N
  C6        C5        H21             121.85(34)      1_555  .      1_555  N
  C6        C5        H42             118.14(35)      1_555  .      4_565  N
  H21       C5        H42             101.35(21)      1_555  .      4_565  N
  C1        C6        C5              124.50(19)      1_555  .      1_555  N
  C1        C6        H22             130.92(24)      1_555  .      1_555  N
  C5        C6        H22             104.34(22)      1_555  .      1_555  N
  C3        C7        C8              121.07(14)      1_555  .      1_555  N
  C3        C7        H23             118.99(20)      1_555  .      1_555  N
  C8        C7        H23             119.89(20)      1_555  .      1_555  N
  C7        C8        C9              119.93(12)      1_555  .      1_555  N
  C7        C8        H24             111.69(21)      1_555  .      1_555  N
  C9        C8        H24             127.51(20)      1_555  .      1_555  N
  C8        C9        C10             119.76(11)      1_555  .      1_555  N
  C8        C9        O18             120.58(22)      1_555  .      1_555  N
  C10       C9        O18             119.66(21)      1_555  .      1_555  N
  C4        C10       C9              120.75(11)      1_555  .      1_555  N
  C4        C10       H25             133.04(22)      1_555  .      1_555  N
  C9        C10       H25             105.52(21)      1_555  .      1_555  N
  C2        C11       C12             111.75(20)      1_555  .      1_555  N
  C2        C11       H26             112.94(29)      1_555  .      1_555  N
  C2        C11       H27             106.84(26)      1_555  .      1_555  N
  C12       C11       H26             111.37(32)      1_555  .      1_555  N
  C12       C11       H27             104.81(25)      1_555  .      1_555  N
  H26       C11       H27             108.65(24)      1_555  .      1_555  N
  C11       C12       C13             111.21(19)      1_555  .      1_555  N
  C11       C12       H28             110.82(27)      1_555  .      1_555  N
  C11       C12       H29             114.29(27)      1_555  .      1_555  N
  C13       C12       H28             105.61(21)      1_555  .      1_555  N
  C13       C12       H29             110.71(24)      1_555  .      1_555  N
  H28       C12       H29             103.61(22)      1_555  .      1_555  N
  C12       C13       C14             107.23(18)      1_555  .      1_555  N
  C12       C13       C17             116.06(12)      1_555  .      1_555  N
  C12       C13       C19             112.73(18)      1_555  .      1_555  N
  C14       C13       C17              99.05(11)      1_555  .      1_555  N
  C14       C13       C19             110.38(18)      1_555  .      1_555  N
  C17       C13       C19             110.42(19)      1_555  .      1_555  N
  C1        C14       C13             112.33(19)      1_555  .      1_555  N
  C1        C14       C15             121.59(18)      1_555  .      1_555  N
  C1        C14       H34             102.72(23)      1_555  .      1_555  N
  C13       C14       C15             104.10(12)      1_555  .      1_555  N
  C13       C14       H34             113.84(20)      1_555  .      1_555  N
  C15       C14       H34             102.16(25)      1_555  .      1_555  N
  C14       C15       C16             103.28(15)      1_555  .      1_555  N
  C14       C15       H30             117.14(26)      1_555  .      1_555  N
  C14       C15       H31             105.37(23)      1_555  .      1_555  N
  C16       C15       H30             121.71(29)      1_555  .      1_555  N
  C16       C15       H31             114.30(28)      1_555  .      1_555  N
  H30       C15       H31              94.18(19)      1_555  .      1_555  N
  C15       C16       C17             106.84(12)      1_555  .      1_555  N
  C15       C16       H32             101.09(27)      1_555  .      1_555  N
  C15       C16       H33             106.35(31)      1_555  .      1_555  N
  C17       C16       H32             108.59(26)      1_555  .      1_555  N
  C17       C16       H33             128.43(28)      1_555  .      1_555  N
  H32       C16       H33             102.36(21)      1_555  .      1_555  N
  C13       C17       C16             104.66(11)      1_555  .      1_555  N
  C13       C17       O20             114.37(18)      1_555  .      1_555  N
  C13       C17       H38             115.52(22)      1_555  .      1_555  N
  C16       C17       O20             110.94(21)      1_555  .      1_555  N
  C16       C17       H38             110.40(25)      1_555  .      1_555  N
  O20       C17       H38             101.11(22)      1_555  .      1_555  N
  C9        O18       H39             100.53(12)      1_555  .      1_555  N
  C13       C19       H35             111.97(28)      1_555  .      1_555  N
  C13       C19       H36             100.49(25)      1_555  .      1_555  N
  C13       C19       H37             116.86(29)      1_555  .      1_555  N
  H35       C19       H36             102.97(30)      1_555  .      1_555  N
  H35       C19       H37             116.09(35)      1_555  .      1_555  N
  H36       C19       H37             105.85(32)      1_555  .      1_555  N
  C17       O20       H40             117.78(29)      1_555  .      1_555  N

# Powder diffraction data for histogram  1
#==============================================================================
# 9. INSTRUMENT CHARACTERIZATION

_exptl_special_details
; ?
;

# if regions of the data are excluded, the reason(s) are supplied here:
_pd_proc_info_excluded_regions
; ?
;

# The following item is used to identify the equipment used to record
# the powder pattern when the diffractogram was measured at a laboratory
# other than the authors' home institution, e.g. when neutron or synchrotron
# radiation is used.

_pd_instr_location
; ?
;
_pd_calibration_special_details           # description of the method used
                                          # to calibrate the instrument
; ?
;

_diffrn_ambient_temperature       ?
_diffrn_source                    ?
_diffrn_source_target             ?
_diffrn_source_type               ?
_diffrn_measurement_device_type   ?
_diffrn_detector                  ?
_diffrn_detector_type             ?       # make or model of detector

_pd_meas_scan_method              ?       # options are 'step', 'cont',
                                          # 'tof', 'fixed' or
                                          # 'disp' (= dispersive)
_pd_meas_special_details
;  ?
;

# The following two items identify the program(s) used (if appropriate).
_computing_data_collection        ?
_computing_data_reduction         ?

# Describe any processing performed on the data, prior to refinement.
# For example: a manual Lp correction or a precomputed absorption correction
_pd_proc_info_data_reduction      ?

# The following item is used for angular dispersive measurements only.

_diffrn_radiation_monochromator   ?

# The following items are used to define the size of the instrument.
# Not all distances are appropriate for all instrument types.

_pd_instr_dist_src/mono           ?
_pd_instr_dist_mono/spec          ?
_pd_instr_dist_src/spec           ?
_pd_instr_dist_spec/anal          ?
_pd_instr_dist_anal/detc          ?
_pd_instr_dist_spec/detc          ?

# 10. Specimen size and mounting information

# The next three fields give the specimen dimensions in mm.  The equatorial
# plane contains the incident and diffracted beam.

_pd_spec_size_axial               ?       # perpendicular to
                                          # equatorial plane

_pd_spec_size_equat               ?       # parallel to
                                          # scattering vector
                                          # in transmission

_pd_spec_size_thick               ?       # parallel to
                                          # scattering vector
                                          # in reflection

_pd_spec_mounting                         # This field should be
                                          # used to give details of the
                                          # container.
; ?
;

_pd_spec_mount_mode               ?       # options are 'reflection'
                                          # or 'transmission'

_pd_spec_shape                    ?       # options are 'cylinder'
                                          # 'flat_sheet' or 'irregular'


loop_ _atom_type_symbol
      _atom_type_number_in_cell
      _atom_type_scat_dispersion_real
      _atom_type_scat_dispersion_imag
      _atom_type_scat_Cromer_Mann_a1
      _atom_type_scat_Cromer_Mann_a2
      _atom_type_scat_Cromer_Mann_a3
      _atom_type_scat_Cromer_Mann_a4
      _atom_type_scat_Cromer_Mann_b1
      _atom_type_scat_Cromer_Mann_b2
      _atom_type_scat_Cromer_Mann_b3
      _atom_type_scat_Cromer_Mann_b4
      _atom_type_scat_Cromer_Mann_c
      _atom_type_scat_source
  C         72.0    0.000    0.000
 2.31000 20.8439 1.02000 10.2075 1.58860 0.56870 0.86500 51.6512 0.21560 
  International_Tables_Vol_C
  O          8.0    0.000    0.000
 3.04850 13.2771 2.28680 5.70110 1.54630 0.32390 0.86700 32.9089 0.25080 
  International_Tables_Vol_C
  H         88.0    0.000    0.000
 0.49300 10.5109 0.32291 26.1257 0.14019 3.14236 0.04081 57.7997 0.00304 
  International_Tables_Vol_C
_diffrn_radiation_probe                x-ray
_diffrn_radiation_polarisn_ratio       0.99
_diffrn_radiation_wavelength           0.413342
_diffrn_radiation_type                 ?
_pd_proc_ls_prof_R_factor              0.0732
_pd_proc_ls_prof_wR_factor             0.0902
_pd_proc_ls_prof_wR_expected           0.0618
_refine_ls_R_Fsqd_factor               0.13604

_pd_proc_ls_background_function
;   GSAS Background function number 1 with  3 terms.
 Shifted Chebyshev function of 1st kind
      1:    122.914     2:    3.82805     3:   -15.8637    
;

_exptl_absorpt_process_details
;   GSAS Absorption/surface roughness correction: function number 0
 No correction is applied.
;
_exptl_absorpt_correction_T_min        1.00000
_exptl_absorpt_correction_T_max        1.00000
# Extinction correction
_gsas_exptl_extinct_corr_T_min         1.00000
_gsas_exptl_extinct_corr_T_max         1.00000

_pd_proc_ls_profile_function
;
 CW Profile function number 4 with  18 terms
 Pseudovoigt profile coefficients as parameterized in
 P. Thompson, D.E. Cox & J.B. Hastings (1987). J. Appl. Cryst.,20,79-83.
 Asymmetry correction of L.W. Finger, D.E. Cox & A. P. Jephcoat (1994).
 J. Appl. Cryst.,27,892-900.
 Microstrain broadening by P.W. Stephens,  (1999). J. Appl. Cryst.,32,281-289.
 #1(GU)   =    1.163 #2(GV)   =   -0.126 #3(GW)   =    0.063
 #4(GP)   =    0.000 #5(LX)   =    0.173 #6(ptec) =     0.00
 #7(trns) =     0.00 #8(shft) =   0.0000 #9(sfec) =     0.00
 #10(S/L) =   0.0011 #11(H/L) =   0.0011 #12(eta) =   0.4575
 #13(S400 ) =  5.1E-03 #14(S040 ) =  1.1E-03 #15(S004 ) =  0.0E+00
 #16(S220 ) =  4.1E-03 #17(S202 ) =  7.7E-05 #18(S022 ) =  6.1E-05
 Peak tails are ignored  where the intensity is below 0.0010 times the peak
   Aniso. broadening axis   0.0   0.0   1.0
;
_pd_proc_ls_peak_cutoff 0.00100
_pd_proc_info_datetime                 2017-03-27T12:41:52
_pd_calc_method                        "Rietveld Refinement"

#---- raw/calc data loop -----

loop_
      _pd_meas_2theta_scan
      _pd_meas_intensity_total
      _pd_proc_ls_weight
      _pd_proc_intensity_bkg_calc
      _pd_calc_intensity_total
   0.5000    287(27)      .            .       .
   0.5010    316(29)      .            .       .
   0.5020    316(29)      .            .       .
   0.5030    268(26)      .            .       .
   0.5040    295(28)      .            .       .
   0.5050    357(30)      .            .       .
   0.5060    330(29)      .            .       .
   0.5070    285(27)      .            .       .
   0.5080    295(28)      .            .       .
   0.5090    307(28)      .            .       .
   0.5100    288(27)      .            .       .
   0.5110    281(27)      .            .       .
   0.5120    340(30)      .            .       .
   0.5130    316(29)      .            .       .
   0.5140    316(29)      .            .       .
   0.5150    318(29)      .            .       .
   0.5160    278(27)      .            .       .
   0.5170    288(27)      .            .       .
   0.5180    286(27)      .            .       .
   0.5190    315(29)      .            .       .
   0.5200    312(28)      .            .       .
   0.5210    308(28)      .            .       .
   0.5220    304(28)      .            .       .
   0.5230    284(27)      .            .       .
   0.5240    291(27)      .            .       .
   0.5250    266(26)      .            .       .
   0.5260    283(27)      .            .       .
   0.5270    315(29)      .            .       .
   0.5280    321(29)      .            .       .
   0.5290    312(28)      .            .       .
   0.5300    284(27)      .            .       .
   0.5310    283(27)      .            .       .
   0.5320    324(29)      .            .       .
   0.5330    267(26)      .            .       .
   0.5340    260(26)      .            .       .
   0.5350    308(28)      .            .       .
   0.5360    280(27)      .            .       .
   0.5370    265(26)      .            .       .
   0.5380    304(28)      .            .       .
   0.5390    296(28)      .            .       .
   0.5400    306(28)      .            .       .
   0.5410    262(26)      .            .       .
   0.5420    358(30)      .            .       .
   0.5430    273(27)      .            .       .
   0.5440    262(26)      .            .       .
   0.5450    286(27)      .            .       .
   0.5460    302(28)      .            .       .
   0.5470    285(27)      .            .       .
   0.5480    266(26)      .            .       .
   0.5490    288(27)      .            .       .
   0.5500    307(28)      .            .       .
   0.5510    283(27)      .            .       .
   0.5520    282(27)      .            .       .
   0.5530    319(29)      .            .       .
   0.5540    313(28)      .            .       .
   0.5550    324(29)      .            .       .
   0.5560    285(27)      .            .       .
   0.5570    272(26)      .            .       .
   0.5580    347(30)      .            .       .
   0.5590    382(32)      .            .       .
   0.5600    314(29)      .            .       .
   0.5610    285(27)      .            .       .
   0.5620    311(28)      .            .       .
   0.5630    311(28)      .            .       .
   0.5640    335(29)      .            .       .
   0.5650    288(27)      .            .       .
   0.5660    282(27)      .            .       .
   0.5670    303(28)      .            .       .
   0.5680    297(28)      .            .       .
   0.5690    265(26)      .            .       .
   0.5700    306(28)      .            .       .
   0.5710    291(27)      .            .       .
   0.5720    277(27)      .            .       .
   0.5730    334(30)      .            .       .
   0.5740    302(28)      .            .       .
   0.5750    320(29)      .            .       .
   0.5760    305(28)      .            .       .
   0.5770    325(29)      .            .       .
   0.5780    332(29)      .            .       .
   0.5790    285(27)      .            .       .
   0.5800    286(27)      .            .       .
   0.5810    319(29)      .            .       .
   0.5820    337(30)      .            .       .
   0.5830    324(29)      .            .       .
   0.5840    263(26)      .            .       .
   0.5850    277(27)      .            .       .
   0.5860    278(27)      .            .       .
   0.5870    324(29)      .            .       .
   0.5880    298(28)      .            .       .
   0.5890    268(26)      .            .       .
   0.5900    289(27)      .            .       .
   0.5910    297(28)      .            .       .
   0.5920    289(27)      .            .       .
   0.5930    290(27)      .            .       .
   0.5940    291(27)      .            .       .
   0.5950    319(29)      .            .       .
   0.5960    282(27)      .            .       .
   0.5970    291(28)      .            .       .
   0.5980    277(27)      .            .       .
   0.5990    323(29)      .            .       .
   0.6000    297(28)      .            .       .
   0.6010    295(28)      .            .       .
   0.6020    315(29)      .            .       .
   0.6030    291(27)      .            .       .
   0.6040    304(28)      .            .       .
   0.6050    316(29)      .            .       .
   0.6060    325(29)      .            .       .
   0.6070    276(27)      .            .       .
   0.6080    259(26)      .            .       .
   0.6090    246(25)      .            .       .
   0.6100    270(26)      .            .       .
   0.6110    289(27)      .            .       .
   0.6120    320(29)      .            .       .
   0.6130    297(28)      .            .       .
   0.6140    280(27)      .            .       .
   0.6150    276(27)      .            .       .
   0.6160    275(27)      .            .       .
   0.6170    313(28)      .            .       .
   0.6180    311(28)      .            .       .
   0.6190    281(27)      .            .       .
   0.6200    337(29)      .            .       .
   0.6210    274(27)      .            .       .
   0.6220    281(27)      .            .       .
   0.6230    305(28)      .            .       .
   0.6240    286(27)      .            .       .
   0.6250    322(29)      .            .       .
   0.6260    284(27)      .            .       .
   0.6270    259(26)      .            .       .
   0.6280    334(29)      .            .       .
   0.6290    298(28)      .            .       .
   0.6300    279(27)      .            .       .
   0.6310    298(28)      .            .       .
   0.6320    300(28)      .            .       .
   0.6330    313(28)      .            .       .
   0.6340    293(27)      .            .       .
   0.6350    266(26)      .            .       .
   0.6360    282(27)      .            .       .
   0.6370    336(30)      .            .       .
   0.6380    294(28)      .            .       .
   0.6390    255(26)      .            .       .
   0.6400    215(24)      .            .       .
   0.6410    296(28)      .            .       .
   0.6420    337(30)      .            .       .
   0.6430    336(30)      .            .       .
   0.6440    278(27)      .            .       .
   0.6450    286(27)      .            .       .
   0.6460    247(25)      .            .       .
   0.6470    301(28)      .            .       .
   0.6480    253(26)      .            .       .
   0.6490    272(27)      .            .       .
   0.6500    281(27)      .            .       .
   0.6510    270(27)      .            .       .
   0.6520    287(27)      .            .       .
   0.6530    342(30)      .            .       .
   0.6540    291(27)      .            .       .
   0.6550    274(27)      .            .       .
   0.6560    264(26)      .            .       .
   0.6570    292(27)      .            .       .
   0.6580    290(27)      .            .       .
   0.6590    264(26)      .            .       .
   0.6600    289(27)      .            .       .
   0.6610    294(28)      .            .       .
   0.6620    317(29)      .            .       .
   0.6630    305(28)      .            .       .
   0.6640    296(28)      .            .       .
   0.6650    295(28)      .            .       .
   0.6660    274(27)      .            .       .
   0.6670    312(28)      .            .       .
   0.6680    277(27)      .            .       .
   0.6690    290(27)      .            .       .
   0.6700    304(28)      .            .       .
   0.6710    342(30)      .            .       .
   0.6720    311(28)      .            .       .
   0.6730    258(26)      .            .       .
   0.6740    299(28)      .            .       .
   0.6750    325(29)      .            .       .
   0.6760    265(26)      .            .       .
   0.6770    311(28)      .            .       .
   0.6780    317(29)      .            .       .
   0.6790    289(27)      .            .       .
   0.6800    294(28)      .            .       .
   0.6810    353(30)      .            .       .
   0.6820    306(28)      .            .       .
   0.6830    299(28)      .            .       .
   0.6840    286(27)      .            .       .
   0.6850    287(27)      .            .       .
   0.6860    317(29)      .            .       .
   0.6870    304(28)      .            .       .
   0.6880    300(28)      .            .       .
   0.6890    289(27)      .            .       .
   0.6900    281(27)      .            .       .
   0.6910    270(26)      .            .       .
   0.6920    309(28)      .            .       .
   0.6930    265(26)      .            .       .
   0.6940    241(25)      .            .       .
   0.6950    257(26)      .            .       .
   0.6960    284(27)      .            .       .
   0.6970    289(27)      .            .       .
   0.6980    279(27)      .            .       .
   0.6990    300(28)      .            .       .
   0.7000    290(27)      .            .       .
   0.7010    320(29)      .            .       .
   0.7020    271(27)      .            .       .
   0.7030    291(28)      .            .       .
   0.7040    303(28)      .            .       .
   0.7050    325(29)      .            .       .
   0.7060    263(26)      .            .       .
   0.7070    266(26)      .            .       .
   0.7080    282(27)      .            .       .
   0.7090    329(29)      .            .       .
   0.7100    314(29)      .            .       .
   0.7110    270(26)      .            .       .
   0.7120    325(29)      .            .       .
   0.7130    303(28)      .            .       .
   0.7140    308(28)      .            .       .
   0.7150    282(27)      .            .       .
   0.7160    273(27)      .            .       .
   0.7170    284(27)      .            .       .
   0.7180    318(29)      .            .       .
   0.7190    342(30)      .            .       .
   0.7200    305(28)      .            .       .
   0.7210    289(27)      .            .       .
   0.7220    241(25)      .            .       .
   0.7230    265(26)      .            .       .
   0.7240    313(28)      .            .       .
   0.7250    305(28)      .            .       .
   0.7260    323(29)      .            .       .
   0.7270    320(29)      .            .       .
   0.7280    299(28)      .            .       .
   0.7290    278(27)      .            .       .
   0.7300    279(27)      .            .       .
   0.7310    315(29)      .            .       .
   0.7320    319(29)      .            .       .
   0.7330    347(30)      .            .       .
   0.7340    330(29)      .            .       .
   0.7350    327(29)      .            .       .
   0.7360    311(28)      .            .       .
   0.7370    344(30)      .            .       .
   0.7380    322(29)      .            .       .
   0.7390    289(27)      .            .       .
   0.7400    287(27)      .            .       .
   0.7410    293(28)      .            .       .
   0.7420    277(27)      .            .       .
   0.7430    279(27)      .            .       .
   0.7440    246(25)      .            .       .
   0.7450    252(26)      .            .       .
   0.7460    266(26)      .            .       .
   0.7470    279(27)      .            .       .
   0.7480    272(27)      .            .       .
   0.7490    277(27)      .            .       .
   0.7500    290(27)      .            .       .
   0.7510    309(28)      .            .       .
   0.7520    329(29)      .            .       .
   0.7530    300(28)      .            .       .
   0.7540    285(27)      .            .       .
   0.7550    275(27)      .            .       .
   0.7560    264(26)      .            .       .
   0.7570    320(29)      .            .       .
   0.7580    294(28)      .            .       .
   0.7590    298(28)      .            .       .
   0.7600    305(28)      .            .       .
   0.7610    299(28)      .            .       .
   0.7620    301(28)      .            .       .
   0.7630    297(28)      .            .       .
   0.7640    291(28)      .            .       .
   0.7650    277(27)      .            .       .
   0.7660    337(29)      .            .       .
   0.7670    295(28)      .            .       .
   0.7680    276(27)      .            .       .
   0.7690    299(28)      .            .       .
   0.7700    313(28)      .            .       .
   0.7710    279(27)      .            .       .
   0.7720    295(28)      .            .       .
   0.7730    253(26)      .            .       .
   0.7740    287(27)      .            .       .
   0.7750    376(31)      .            .       .
   0.7760    327(29)      .            .       .
   0.7770    284(27)      .            .       .
   0.7780    268(26)      .            .       .
   0.7790    280(27)      .            .       .
   0.7800    315(29)      .            .       .
   0.7810    307(28)      .            .       .
   0.7820    276(27)      .            .       .
   0.7830    303(28)      .            .       .
   0.7840    274(27)      .            .       .
   0.7850    296(28)      .            .       .
   0.7860    261(26)      .            .       .
   0.7870    334(29)      .            .       .
   0.7880    311(28)      .            .       .
   0.7890    299(28)      .            .       .
   0.7900    290(27)      .            .       .
   0.7910    325(29)      .            .       .
   0.7920    326(29)      .            .       .
   0.7930    321(29)      .            .       .
   0.7940    357(30)      .            .       .
   0.7950    310(28)      .            .       .
   0.7960    284(27)      .            .       .
   0.7970    300(28)      .            .       .
   0.7980    304(28)      .            .       .
   0.7990    304(28)      .            .       .
   0.8000    257(26)      .            .       .
   0.8010    273(27)      .            .       .
   0.8020    297(28)      .            .       .
   0.8030    271(26)      .            .       .
   0.8040    281(27)      .            .       .
   0.8050    295(28)      .            .       .
   0.8060    300(28)      .            .       .
   0.8070    332(29)      .            .       .
   0.8080    294(28)      .            .       .
   0.8090    300(28)      .            .       .
   0.8100    292(28)      .            .       .
   0.8110    286(27)      .            .       .
   0.8120    323(29)      .            .       .
   0.8130    292(28)      .            .       .
   0.8140    280(27)      .            .       .
   0.8150    281(27)      .            .       .
   0.8160    275(27)      .            .       .
   0.8170    285(27)      .            .       .
   0.8180    293(28)      .            .       .
   0.8190    266(26)      .            .       .
   0.8200    273(27)      .            .       .
   0.8210    292(28)      .            .       .
   0.8220    307(28)      .            .       .
   0.8230    302(28)      .            .       .
   0.8240    268(26)      .            .       .
   0.8250    317(29)      .            .       .
   0.8260    267(26)      .            .       .
   0.8270    303(28)      .            .       .
   0.8280    287(27)      .            .       .
   0.8290    285(27)      .            .       .
   0.8300    289(27)      .            .       .
   0.8310    347(30)      .            .       .
   0.8320    304(28)      .            .       .
   0.8330    287(27)      .            .       .
   0.8340    277(27)      .            .       .
   0.8350    261(26)      .            .       .
   0.8360    319(29)      .            .       .
   0.8370    298(28)      .            .       .
   0.8380    295(28)      .            .       .
   0.8390    313(28)      .            .       .
   0.8400    308(28)      .            .       .
   0.8410    310(28)      .            .       .
   0.8420    273(27)      .            .       .
   0.8430    267(26)      .            .       .
   0.8440    299(28)      .            .       .
   0.8450    292(28)      .            .       .
   0.8460    306(28)      .            .       .
   0.8470    300(28)      .            .       .
   0.8480    293(28)      .            .       .
   0.8490    266(26)      .            .       .
   0.8500    327(29)      .            .       .
   0.8510    298(28)      .            .       .
   0.8520    267(26)      .            .       .
   0.8530    303(28)      .            .       .
   0.8540    329(29)      .            .       .
   0.8550    290(27)      .            .       .
   0.8560    271(27)      .            .       .
   0.8570    266(26)      .            .       .
   0.8580    295(28)      .            .       .
   0.8590    316(29)      .            .       .
   0.8600    308(28)      .            .       .
   0.8610    334(29)      .            .       .
   0.8620    323(29)      .            .       .
   0.8630    342(30)      .            .       .
   0.8640    316(29)      .            .       .
   0.8650    319(29)      .            .       .
   0.8660    282(27)      .            .       .
   0.8670    289(27)      .            .       .
   0.8680    310(28)      .            .       .
   0.8690    293(28)      .            .       .
   0.8700    312(28)      .            .       .
   0.8710    308(28)      .            .       .
   0.8720    269(27)      .            .       .
   0.8730    296(28)      .            .       .
   0.8740    314(29)      .            .       .
   0.8750    296(28)      .            .       .
   0.8760    289(27)      .            .       .
   0.8770    299(28)      .            .       .
   0.8780    292(27)      .            .       .
   0.8790    337(29)      .            .       .
   0.8800    293(28)      .            .       .
   0.8810    291(28)      .            .       .
   0.8820    311(28)      .            .       .
   0.8830    333(29)      .            .       .
   0.8840    343(30)      .            .       .
   0.8850    282(27)      .            .       .
   0.8860    297(28)      .            .       .
   0.8870    302(28)      .            .       .
   0.8880    272(27)      .            .       .
   0.8890    245(25)      .            .       .
   0.8900    264(26)      .            .       .
   0.8910    314(29)      .            .       .
   0.8920    286(27)      .            .       .
   0.8930    352(30)      .            .       .
   0.8940    349(30)      .            .       .
   0.8950    307(28)      .            .       .
   0.8960    309(28)      .            .       .
   0.8970    290(27)      .            .       .
   0.8980    322(29)      .            .       .
   0.8990    322(29)      .            .       .
   0.9000    329(29)      .            .       .
   0.9010    283(27)      .            .       .
   0.9020    329(29)      .            .       .
   0.9030    287(27)      .            .       .
   0.9040    310(28)      .            .       .
   0.9050    301(28)      .            .       .
   0.9060    288(27)      .            .       .
   0.9070    330(29)      .            .       .
   0.9080    325(29)      .            .       .
   0.9090    310(28)      .            .       .
   0.9100    367(31)      .            .       .
   0.9110    320(29)      .            .       .
   0.9120    300(28)      .            .       .
   0.9130    316(29)      .            .       .
   0.9140    324(29)      .            .       .
   0.9150    300(28)      .            .       .
   0.9160    298(28)      .            .       .
   0.9170    286(27)      .            .       .
   0.9180    277(27)      .            .       .
   0.9190    319(29)      .            .       .
   0.9200    319(29)      .            .       .
   0.9209    259(26)      .            .       .
   0.9219    307(28)      .            .       .
   0.9229    324(29)      .            .       .
   0.9239    303(28)      .            .       .
   0.9249    336(29)      .            .       .
   0.9259    324(29)      .            .       .
   0.9269    291(27)      .            .       .
   0.9279    311(28)      .            .       .
   0.9289    301(28)      .            .       .
   0.9299    272(27)      .            .       .
   0.9309    279(27)      .            .       .
   0.9319    306(28)      .            .       .
   0.9329    304(28)      .            .       .
   0.9339    315(29)      .            .       .
   0.9349    340(30)      .            .       .
   0.9359    317(29)      .            .       .
   0.9369    301(28)      .            .       .
   0.9379    306(28)      .            .       .
   0.9389    331(29)      .            .       .
   0.9399    324(29)      .            .       .
   0.9409    281(27)      .            .       .
   0.9419    286(27)      .            .       .
   0.9429    283(27)      .            .       .
   0.9439    286(27)      .            .       .
   0.9449    279(27)      .            .       .
   0.9459    280(27)      .            .       .
   0.9469    309(28)      .            .       .
   0.9479    286(27)      .            .       .
   0.9489    307(28)      .            .       .
   0.9499    277(27)      .            .       .
   0.9509    279(27)      .            .       .
   0.9519    317(29)      .            .       .
   0.9529    327(29)      .            .       .
   0.9539    338(30)      .            .       .
   0.9549    334(29)      .            .       .
   0.9559    305(28)      .            .       .
   0.9569    328(29)      .            .       .
   0.9579    318(29)      .            .       .
   0.9589    315(29)      .            .       .
   0.9599    339(30)      .            .       .
   0.9609    287(27)      .            .       .
   0.9619    276(27)      .            .       .
   0.9629    253(26)      .            .       .
   0.9639    293(28)      .            .       .
   0.9649    302(28)      .            .       .
   0.9659    314(29)      .            .       .
   0.9669    295(28)      .            .       .
   0.9679    316(29)      .            .       .
   0.9689    278(27)      .            .       .
   0.9699    272(26)      .            .       .
   0.9709    332(29)      .            .       .
   0.9719    285(27)      .            .       .
   0.9729    300(28)      .            .       .
   0.9739    316(29)      .            .       .
   0.9749    316(29)      .            .       .
   0.9759    267(26)      .            .       .
   0.9769    316(29)      .            .       .
   0.9779    288(27)      .            .       .
   0.9789    297(28)      .            .       .
   0.9799    283(27)      .            .       .
   0.9809    317(29)      .            .       .
   0.9819    309(28)      .            .       .
   0.9829    295(28)      .            .       .
   0.9839    335(29)      .            .       .
   0.9849    312(29)      .            .       .
   0.9859    272(27)      .            .       .
   0.9869    288(27)      .            .       .
   0.9879    279(27)      .            .       .
   0.9889    296(28)      .            .       .
   0.9899    314(29)      .            .       .
   0.9909    297(28)      .            .       .
   0.9919    280(27)      .            .       .
   0.9929    268(26)      .            .       .
   0.9939    318(29)      .            .       .
   0.9949    313(28)      .            .       .
   0.9959    281(27)      .            .       .
   0.9969    303(28)      .            .       .
   0.9979    253(26)      .            .       .
   0.9989    310(28)      .            .       .
   0.9999    334(29)      .            .       .
   1.0009    326(29)      .            .       .
   1.0019    323(29)      .            .       .
   1.0029    265(26)      .            .       .
   1.0039    258(26)      .            .       .
   1.0049    287(27)      .            .       .
   1.0059    305(28)      .            .       .
   1.0069    289(28)      .            .       .
   1.0079    313(29)      .            .       .
   1.0089    279(27)      .            .       .
   1.0099    267(26)      .            .       .
   1.0109    287(27)      .            .       .
   1.0119    289(27)      .            .       .
   1.0129    306(28)      .            .       .
   1.0139    276(27)      .            .       .
   1.0149    253(26)      .            .       .
   1.0159    287(27)      .            .       .
   1.0169    251(26)      .            .       .
   1.0179    282(27)      .            .       .
   1.0189    272(27)      .            .       .
   1.0199    259(26)      .            .       .
   1.0209    275(27)      .            .       .
   1.0219    263(26)      .            .       .
   1.0229    271(27)      .            .       .
   1.0239    291(27)      .            .       .
   1.0249    316(29)      .            .       .
   1.0259    294(27)      .            .       .
   1.0269    261(26)      .            .       .
   1.0279    281(27)      .            .       .
   1.0289    280(27)      .            .       .
   1.0299    287(27)      .            .       .
   1.0309    282(27)      .            .       .
   1.0319    275(27)      .            .       .
   1.0329    285(27)      .            .       .
   1.0339    252(26)      .            .       .
   1.0349    286(27)      .            .       .
   1.0359    343(30)      .            .       .
   1.0369    259(26)      .            .       .
   1.0379    286(27)      .            .       .
   1.0389    291(27)      .            .       .
   1.0399    308(28)      .            .       .
   1.0409    280(27)      .            .       .
   1.0419    292(28)      .            .       .
   1.0429    264(26)      .            .       .
   1.0439    242(25)      .            .       .
   1.0449    286(27)      .            .       .
   1.0459    330(29)      .            .       .
   1.0469    283(27)      .            .       .
   1.0479    290(27)      .            .       .
   1.0489    299(28)      .            .       .
   1.0499    280(27)      .            .       .
   1.0509    289(27)      .            .       .
   1.0519    295(28)      .            .       .
   1.0529    269(26)      .            .       .
   1.0539    311(28)      .            .       .
   1.0549    270(26)      .            .       .
   1.0559    288(27)      .            .       .
   1.0569    261(26)      .            .       .
   1.0579    237(25)      .            .       .
   1.0589    287(27)      .            .       .
   1.0599    291(27)      .            .       .
   1.0609    292(28)      .            .       .
   1.0619    306(28)      .            .       .
   1.0629    281(27)      .            .       .
   1.0639    250(26)      .            .       .
   1.0649    258(26)      .            .       .
   1.0659    290(28)      .            .       .
   1.0669    293(28)      .            .       .
   1.0679    265(26)      .            .       .
   1.0689    301(28)      .            .       .
   1.0699    284(27)      .            .       .
   1.0709    312(28)      .            .       .
   1.0719    299(28)      .            .       .
   1.0729    312(29)      .            .       .
   1.0739    263(26)      .            .       .
   1.0749    273(27)      .            .       .
   1.0759    215(24)      .            .       .
   1.0769    272(27)      .            .       .
   1.0779    309(28)      .            .       .
   1.0789    300(28)      .            .       .
   1.0799    259(26)      .            .       .
   1.0809    277(27)      .            .       .
   1.0819    281(27)      .            .       .
   1.0829    276(27)      .            .       .
   1.0839    312(29)      .            .       .
   1.0849    284(27)      .            .       .
   1.0859    284(27)      .            .       .
   1.0869    310(28)      .            .       .
   1.0879    251(25)      .            .       .
   1.0889    284(27)      .            .       .
   1.0899    253(26)      .            .       .
   1.0909    248(25)      .            .       .
   1.0919    283(27)      .            .       .
   1.0929    258(26)      .            .       .
   1.0939    254(26)      .            .       .
   1.0949    280(27)      .            .       .
   1.0959    284(27)      .            .       .
   1.0969    253(26)      .            .       .
   1.0979    309(28)      .            .       .
   1.0989    279(27)      .            .       .
   1.0999    288(27)      .            .       .
   1.1009    301(28)      .            .       .
   1.1019    251(25)      .            .       .
   1.1029    236(25)      .            .       .
   1.1039    285(27)      .            .       .
   1.1049    296(28)      .            .       .
   1.1059    274(27)      .            .       .
   1.1069    248(25)      .            .       .
   1.1079    288(27)      .            .       .
   1.1089    273(27)      .            .       .
   1.1099    270(27)      .            .       .
   1.1109    289(27)      .            .       .
   1.1119    277(27)      .            .       .
   1.1129    295(28)      .            .       .
   1.1139    273(27)      .            .       .
   1.1149    285(27)      .            .       .
   1.1159    286(27)      .            .       .
   1.1169    251(25)      .            .       .
   1.1179    264(26)      .            .       .
   1.1189    294(28)      .            .       .
   1.1199    284(27)      .            .       .
   1.1209    219(24)      .            .       .
   1.1219    219(24)      .            .       .
   1.1229    266(26)      .            .       .
   1.1239    246(25)      .            .       .
   1.1249    269(26)      .            .       .
   1.1259    256(26)      .            .       .
   1.1269    273(27)      .            .       .
   1.1279    281(27)      .            .       .
   1.1289    292(28)      .            .       .
   1.1299    262(26)      .            .       .
   1.1309    276(27)      .            .       .
   1.1319    274(27)      .            .       .
   1.1329    212(23)      .            .       .
   1.1339    213(24)      .            .       .
   1.1349    296(28)      .            .       .
   1.1359    267(26)      .            .       .
   1.1369    264(26)      .            .       .
   1.1379    291(28)      .            .       .
   1.1389    245(25)      .            .       .
   1.1399    270(26)      .            .       .
   1.1409    287(27)      .            .       .
   1.1419    238(25)      .            .       .
   1.1429    250(26)      .            .       .
   1.1439    240(25)      .            .       .
   1.1449    253(26)      .            .       .
   1.1459    239(25)      .            .       .
   1.1469    281(27)      .            .       .
   1.1479    248(25)      .            .       .
   1.1489    249(25)      .            .       .
   1.1499    285(27)      .            .       .
   1.1509    238(25)      .            .       .
   1.1519    240(25)      .            .       .
   1.1529    220(24)      .            .       .
   1.1539    233(25)      .            .       .
   1.1549    265(26)      .            .       .
   1.1559    256(26)      .            .       .
   1.1569    247(25)      .            .       .
   1.1579    282(27)      .            .       .
   1.1589    285(27)      .            .       .
   1.1599    250(25)      .            .       .
   1.1609    245(25)      .            .       .
   1.1619    282(27)      .            .       .
   1.1629    275(27)      .            .       .
   1.1639    274(27)      .            .       .
   1.1649    212(23)      .            .       .
   1.1659    250(25)      .            .       .
   1.1669    250(26)      .            .       .
   1.1679    233(25)      .            .       .
   1.1689    243(25)      .            .       .
   1.1699    254(26)      .            .       .
   1.1709    295(28)      .            .       .
   1.1719    301(28)      .            .       .
   1.1729    238(25)      .            .       .
   1.1739    243(25)      .            .       .
   1.1749    266(26)      .            .       .
   1.1759    253(26)      .            .       .
   1.1769    264(26)      .            .       .
   1.1779    208(23)      .            .       .
   1.1789    252(25)      .            .       .
   1.1799    248(25)      .            .       .
   1.1809    220(24)      .            .       .
   1.1819    284(27)      .            .       .
   1.1829    254(26)      .            .       .
   1.1839    309(28)      .            .       .
   1.1849    258(26)      .            .       .
   1.1859    258(26)      .            .       .
   1.1869    238(25)      .            .       .
   1.1879    278(27)      .            .       .
   1.1889    247(25)      .            .       .
   1.1899    233(25)      .            .       .
   1.1909    229(24)      .            .       .
   1.1919    279(27)      .            .       .
   1.1929    270(26)      .            .       .
   1.1939    265(26)      .            .       .
   1.1949    278(27)      .            .       .
   1.1959    244(25)      .            .       .
   1.1969    244(25)      .            .       .
   1.1979    276(27)      .            .       .
   1.1989    243(25)      .            .       .
   1.1999    246(25)      .            .       .
   1.2009    233(25)      .            .       .
   1.2019    230(25)      .            .       .
   1.2029    238(25)      .            .       .
   1.2039    283(27)      .            .       .
   1.2049    273(26)      .            .       .
   1.2059    194(22)      .            .       .
   1.2069    218(24)      .            .       .
   1.2079    230(24)      .            .       .
   1.2089    250(25)      .            .       .
   1.2099    239(25)      .            .       .
   1.2109    260(26)      .            .       .
   1.2119    231(25)      .            .       .
   1.2129    245(25)      .            .       .
   1.2139    252(26)      .            .       .
   1.2149    255(26)      .            .       .
   1.2159    265(26)      .            .       .
   1.2169    225(24)      .            .       .
   1.2179    240(25)      .            .       .
   1.2189    287(27)      .            .       .
   1.2199    242(25)      .            .       .
   1.2209    208(23)      .            .       .
   1.2219    221(24)      .            .       .
   1.2229    246(25)      .            .       .
   1.2239    220(24)      .            .       .
   1.2249    239(25)      .            .       .
   1.2259    234(25)      .            .       .
   1.2269    219(24)      .            .       .
   1.2279    227(24)      .            .       .
   1.2289    228(24)      .            .       .
   1.2299    224(24)      .            .       .
   1.2309    253(26)      .            .       .
   1.2319    247(25)      .            .       .
   1.2329    241(25)      .            .       .
   1.2339    238(25)      .            .       .
   1.2349    259(26)      .            .       .
   1.2359    224(24)      .            .       .
   1.2369    226(24)      .            .       .
   1.2379    239(25)      .            .       .
   1.2389    270(26)      .            .       .
   1.2399    240(25)      .            .       .
   1.2409    264(26)      .            .       .
   1.2419    223(24)      .            .       .
   1.2429    252(26)      .            .       .
   1.2439    270(26)      .            .       .
   1.2449    216(24)      .            .       .
   1.2459    229(24)      .            .       .
   1.2469    273(27)      .            .       .
   1.2479    250(26)      .            .       .
   1.2489    260(26)      .            .       .
   1.2499    261(26)      .            .       .
   1.2509    230(24)      .            .       .
   1.2519    247(25)      .            .       .
   1.2529    225(24)      .            .       .
   1.2539    240(25)      .            .       .
   1.2549    243(25)      .            .       .
   1.2559    235(25)      .            .       .
   1.2569    279(27)      .            .       .
   1.2579    253(26)      .            .       .
   1.2589    268(26)      .            .       .
   1.2599    227(24)      .            .       .
   1.2609    257(26)      .            .       .
   1.2619    278(27)      .            .       .
   1.2629    244(25)      .            .       .
   1.2639    220(24)      .            .       .
   1.2649    204(23)      .            .       .
   1.2659    244(25)      .            .       .
   1.2669    256(26)      .            .       .
   1.2679    262(26)      .            .       .
   1.2689    269(26)      .            .       .
   1.2699    235(25)      .            .       .
   1.2709    231(24)      .            .       .
   1.2719    260(26)      .            .       .
   1.2729    257(26)      .            .       .
   1.2739    271(27)      .            .       .
   1.2749    249(25)      .            .       .
   1.2759    208(23)      .            .       .
   1.2769    239(25)      .            .       .
   1.2779    273(27)      .            .       .
   1.2789    206(23)      .            .       .
   1.2799    211(23)      .            .       .
   1.2809    232(24)      .            .       .
   1.2819    242(25)      .            .       .
   1.2829    258(26)      .            .       .
   1.2839    247(25)      .            .       .
   1.2849    248(25)      .            .       .
   1.2859    264(26)      .            .       .
   1.2869    269(26)      .            .       .
   1.2879    237(25)      .            .       .
   1.2889    236(25)      .            .       .
   1.2899    239(25)      .            .       .
   1.2909    205(23)      .            .       .
   1.2919    223(24)      .            .       .
   1.2929    245(25)      .            .       .
   1.2939    241(25)      .            .       .
   1.2949    231(25)      .            .       .
   1.2959    265(26)      .            .       .
   1.2969    266(26)      .            .       .
   1.2979    228(24)      .            .       .
   1.2989    265(26)      .            .       .
   1.2999    243(25)      .            .       .
   1.3009    284(27)      .            .       .
   1.3019    215(24)      .            .       .
   1.3029    241(25)      .            .       .
   1.3039    221(24)      .            .       .
   1.3049    225(24)      .            .       .
   1.3059    236(25)      .            .       .
   1.3069    269(26)      .            .       .
   1.3079    246(25)      .            .       .
   1.3089    262(26)      .            .       .
   1.3099    223(24)      .            .       .
   1.3109    272(27)      .            .       .
   1.3119    257(26)      .            .       .
   1.3129    264(26)      .            .       .
   1.3139    246(25)      .            .       .
   1.3149    218(24)      .            .       .
   1.3159    236(25)      .            .       .
   1.3169    230(24)      .            .       .
   1.3179    262(26)      .            .       .
   1.3189    215(24)      .            .       .
   1.3199    236(25)      .            .       .
   1.3209    279(27)      .            .       .
   1.3219    270(27)      .            .       .
   1.3229    255(26)      .            .       .
   1.3239    255(26)      .            .       .
   1.3249    261(26)      .            .       .
   1.3259    266(26)      .            .       .
   1.3269    232(25)      .            .       .
   1.3279    273(27)      .            .       .
   1.3289    256(26)      .            .       .
   1.3299    236(25)      .            .       .
   1.3309    218(24)      .            .       .
   1.3319    229(25)      .            .       .
   1.3329    270(26)      .            .       .
   1.3339    231(24)      .            .       .
   1.3349    224(24)      .            .       .
   1.3359    250(25)      .            .       .
   1.3369    241(25)      .            .       .
   1.3379    241(25)      .            .       .
   1.3389    250(25)      .            .       .
   1.3399    298(28)      .            .       .
   1.3409    225(24)      .            .       .
   1.3419    237(25)      .            .       .
   1.3429    246(25)      .            .       .
   1.3439    198(23)      .            .       .
   1.3449    232(25)      .            .       .
   1.3459    237(25)      .            .       .
   1.3469    241(25)      .            .       .
   1.3479    220(24)      .            .       .
   1.3489    230(24)      .            .       .
   1.3499    254(26)      .            .       .
   1.3509    248(25)      .            .       .
   1.3519    266(26)      .            .       .
   1.3529    225(24)      .            .       .
   1.3539    229(24)      .            .       .
   1.3549    254(26)      .            .       .
   1.3559    261(26)      .            .       .
   1.3569    221(24)      .            .       .
   1.3579    229(24)      .            .       .
   1.3589    249(25)      .            .       .
   1.3599    243(25)      .            .       .
   1.3609    253(26)      .            .       .
   1.3619    265(26)      .            .       .
   1.3629    290(27)      .            .       .
   1.3639    235(25)      .            .       .
   1.3649    247(25)      .            .       .
   1.3659    229(24)      .            .       .
   1.3669    241(25)      .            .       .
   1.3679    277(27)      .            .       .
   1.3689    265(26)      .            .       .
   1.3699    250(25)      .            .       .
   1.3709    257(26)      .            .       .
   1.3719    226(24)      .            .       .
   1.3729    224(24)      .            .       .
   1.3739    266(26)      .            .       .
   1.3749    223(24)      .            .       .
   1.3759    232(25)      .            .       .
   1.3769    243(25)      .            .       .
   1.3779    245(25)      .            .       .
   1.3789    248(25)      .            .       .
   1.3799    235(25)      .            .       .
   1.3809    203(23)      .            .       .
   1.3819    237(25)      .            .       .
   1.3829    245(25)      .            .       .
   1.3839    256(26)      .            .       .
   1.3849    272(27)      .            .       .
   1.3859    257(26)      .            .       .
   1.3869    255(26)      .            .       .
   1.3879    245(25)      .            .       .
   1.3889    242(25)      .            .       .
   1.3899    251(25)      .            .       .
   1.3909    296(28)      .            .       .
   1.3919    279(27)      .            .       .
   1.3929    278(27)      .            .       .
   1.3939    282(27)      .            .       .
   1.3949    258(26)      .            .       .
   1.3959    252(25)      .            .       .
   1.3969    266(26)      .            .       .
   1.3979    251(25)      .            .       .
   1.3989    227(24)      .            .       .
   1.3999    276(27)      .            .       .
   1.4009    221(24)      .            .       .
   1.4019    248(25)      .            .       .
   1.4029    270(27)      .            .       .
   1.4039    280(27)      .            .       .
   1.4049    266(26)      .            .       .
   1.4059    264(26)      .            .       .
   1.4069    270(26)      .            .       .
   1.4079    250(25)      .            .       .
   1.4089    268(26)      .            .       .
   1.4099    270(26)      .            .       .
   1.4109    227(24)      .            .       .
   1.4119    268(26)      .            .       .
   1.4129    284(27)      .            .       .
   1.4139    300(28)      .            .       .
   1.4149    286(27)      .            .       .
   1.4159    258(26)      .            .       .
   1.4169    280(27)      .            .       .
   1.4179    285(27)      .            .       .
   1.4189    269(26)      .            .       .
   1.4199    264(26)      .            .       .
   1.4209    242(25)      .            .       .
   1.4219    265(26)      .            .       .
   1.4229    284(27)      .            .       .
   1.4239    297(28)      .            .       .
   1.4249    254(26)      .            .       .
   1.4259    256(26)      .            .       .
   1.4269    233(25)      .            .       .
   1.4279    264(26)      .            .       .
   1.4289    303(28)      .            .       .
   1.4299    267(26)      .            .       .
   1.4309    272(27)      .            .       .
   1.4319    260(26)      .            .       .
   1.4329    252(26)      .            .       .
   1.4339    273(27)      .            .       .
   1.4349    261(26)      .            .       .
   1.4359    268(26)      .            .       .
   1.4369    273(27)      .            .       .
   1.4379    265(26)      .            .       .
   1.4389    253(26)      .            .       .
   1.4399    262(26)      .            .       .
   1.4409    284(27)      .            .       .
   1.4419    276(27)      .            .       .
   1.4429    239(25)      .            .       .
   1.4439    286(27)      .            .       .
   1.4449    256(26)      .            .       .
   1.4459    249(25)      .            .       .
   1.4469    215(24)      .            .       .
   1.4479    237(25)      .            .       .
   1.4489    292(28)      .            .       .
   1.4499    283(27)      .            .       .
   1.4509    289(27)      .            .       .
   1.4519    289(27)      .            .       .
   1.4529    255(26)      .            .       .
   1.4539    292(27)      .            .       .
   1.4549    296(28)      .            .       .
   1.4559    283(27)      .            .       .
   1.4569    273(27)      .            .       .
   1.4579    272(27)      .            .       .
   1.4589    273(27)      .            .       .
   1.4599    285(27)      .            .       .
   1.4609    274(27)      .            .       .
   1.4619    297(28)      .            .       .
   1.4629    273(27)      .            .       .
   1.4639    273(27)      .            .       .
   1.4649    253(26)      .            .       .
   1.4659    254(26)      .            .       .
   1.4669    281(27)      .            .       .
   1.4679    273(27)      .            .       .
   1.4689    291(28)      .            .       .
   1.4699    283(27)      .            .       .
   1.4709    322(29)      .            .       .
   1.4719    304(28)      .            .       .
   1.4729    276(27)      .            .       .
   1.4739    294(28)      .            .       .
   1.4749    254(26)      .            .       .
   1.4759    266(26)      .            .       .
   1.4769    258(26)      .            .       .
   1.4779    274(27)      .            .       .
   1.4789    286(27)      .            .       .
   1.4799    303(28)      .            .       .
   1.4809    284(27)      .            .       .
   1.4819    292(27)      .            .       .
   1.4829    288(27)      .            .       .
   1.4839    281(27)      .            .       .
   1.4849    287(27)      .            .       .
   1.4859    294(28)      .            .       .
   1.4869    312(28)      .            .       .
   1.4879    316(29)      .            .       .
   1.4889    292(27)      .            .       .
   1.4899    261(26)      .            .       .
   1.4909    270(26)      .            .       .
   1.4919    287(27)      .            .       .
   1.4929    263(26)      .            .       .
   1.4939    252(26)      .            .       .
   1.4949    303(28)      .            .       .
   1.4959    307(28)      .            .       .
   1.4969    299(28)      .            .       .
   1.4979    313(29)      .            .       .
   1.4989    290(27)      .            .       .
   1.4999    261(26)      .            .       .
   1.5009    250(25)      .            .       .
   1.5019    282(27)      .            .       .
   1.5029    322(29)      .            .       .
   1.5039    286(27)      .            .       .
   1.5049    278(27)      .            .       .
   1.5059    295(28)      .            .       .
   1.5069    278(27)      .            .       .
   1.5079    278(27)      .            .       .
   1.5089    290(27)      .            .       .
   1.5099    308(28)      .            .       .
   1.5109    313(29)      .            .       .
   1.5119    300(28)      .            .       .
   1.5129    284(27)      .            .       .
   1.5139    270(26)      .            .       .
   1.5149    290(27)      .            .       .
   1.5159    291(28)      .            .       .
   1.5169    284(27)      .            .       .
   1.5179    287(27)      .            .       .
   1.5189    262(26)      .            .       .
   1.5199    307(28)      .            .       .
   1.5209    286(27)      .            .       .
   1.5219    280(27)      .            .       .
   1.5229    305(28)      .            .       .
   1.5239    301(28)      .            .       .
   1.5249    298(28)      .            .       .
   1.5259    307(28)      .            .       .
   1.5269    255(26)      .            .       .
   1.5279    251(26)      .            .       .
   1.5289    251(26)      .            .       .
   1.5299    286(27)      .            .       .
   1.5309    283(27)      .            .       .
   1.5319    288(27)      .            .       .
   1.5329    291(28)      .            .       .
   1.5339    237(25)      .            .       .
   1.5349    279(27)      .            .       .
   1.5359    343(30)      .            .       .
   1.5369    326(29)      .            .       .
   1.5379    291(27)      .            .       .
   1.5389    307(28)      .            .       .
   1.5399    297(28)      .            .       .
   1.5409    290(27)      .            .       .
   1.5419    271(27)      .            .       .
   1.5429    303(28)      .            .       .
   1.5439    306(28)      .            .       .
   1.5449    271(27)      .            .       .
   1.5459    265(26)      .            .       .
   1.5469    265(26)      .            .       .
   1.5479    284(27)      .            .       .
   1.5489    291(27)      .            .       .
   1.5499    314(29)      .            .       .
   1.5509    299(28)      .            .       .
   1.5519    254(26)      .            .       .
   1.5529    241(25)      .            .       .
   1.5539    280(27)      .            .       .
   1.5549    281(27)      .            .       .
   1.5559    313(29)      .            .       .
   1.5569    287(27)      .            .       .
   1.5579    278(27)      .            .       .
   1.5589    285(27)      .            .       .
   1.5599    237(25)      .            .       .
   1.5609    251(25)      .            .       .
   1.5619    267(26)      .            .       .
   1.5629    270(26)      .            .       .
   1.5639    263(26)      .            .       .
   1.5649    284(27)      .            .       .
   1.5659    313(29)      .            .       .
   1.5669    295(28)      .            .       .
   1.5679    267(26)      .            .       .
   1.5689    233(25)      .            .       .
   1.5699    241(25)      .            .       .
   1.5709    242(25)      .            .       .
   1.5719    251(25)      .            .       .
   1.5729    253(26)      .            .       .
   1.5739    261(26)      .            .       .
   1.5749    260(26)      .            .       .
   1.5759    262(26)      .            .       .
   1.5769    247(25)      .            .       .
   1.5779    262(26)      .            .       .
   1.5789    296(28)      .            .       .
   1.5799    279(27)      .            .       .
   1.5809    289(27)      .            .       .
   1.5819    290(27)      .            .       .
   1.5829    294(28)      .            .       .
   1.5839    307(28)      .            .       .
   1.5849    300(28)      .            .       .
   1.5859    259(26)      .            .       .
   1.5869    294(28)      .            .       .
   1.5879    262(26)      .            .       .
   1.5889    222(24)      .            .       .
   1.5899    236(25)      .            .       .
   1.5909    287(27)      .            .       .
   1.5919    242(25)      .            .       .
   1.5929    232(25)      .            .       .
   1.5939    251(26)      .            .       .
   1.5949    254(26)      .            .       .
   1.5959    263(26)      .            .       .
   1.5969    233(25)      .            .       .
   1.5979    211(23)      .            .       .
   1.5989    232(25)      .            .       .
   1.5999    258(26)      .            .       .
   1.6009    271(26)      .            .       .
   1.6019    238(25)      .            .       .
   1.6029    232(25)      .            .       .
   1.6039    237(25)      .            .       .
   1.6049    230(24)      .            .       .
   1.6059    269(26)      .            .       .
   1.6069    262(26)      .            .       .
   1.6079    248(25)      .            .       .
   1.6089    241(25)      .            .       .
   1.6099    274(27)      .            .       .
   1.6109    282(27)      .            .       .
   1.6119    256(26)      .            .       .
   1.6129    267(26)      .            .       .
   1.6139    253(26)      .            .       .
   1.6149    242(25)      .            .       .
   1.6159    260(26)      .            .       .
   1.6169    258(26)      .            .       .
   1.6179    258(26)      .            .       .
   1.6189    250(25)      .            .       .
   1.6199    235(25)      .            .       .
   1.6209    259(26)      .            .       .
   1.6219    263(26)      .            .       .
   1.6229    242(25)      .            .       .
   1.6239    253(26)      .            .       .
   1.6249    255(26)      .            .       .
   1.6259    246(25)      .            .       .
   1.6269    256(26)      .            .       .
   1.6279    271(27)      .            .       .
   1.6289    256(26)      .            .       .
   1.6299    248(25)      .            .       .
   1.6309    252(26)      .            .       .
   1.6319    237(25)      .            .       .
   1.6329    263(26)      .            .       .
   1.6339    272(27)      .            .       .
   1.6349    256(26)      .            .       .
   1.6359    238(25)      .            .       .
   1.6369    212(24)      .            .       .
   1.6379    224(24)      .            .       .
   1.6389    241(25)      .            .       .
   1.6399    267(26)      .            .       .
   1.6409    274(27)      .            .       .
   1.6419    244(25)      .            .       .
   1.6429    223(24)      .            .       .
   1.6439    227(24)      .            .       .
   1.6449    240(25)      .            .       .
   1.6459    266(26)      .            .       .
   1.6469    253(26)      .            .       .
   1.6479    243(25)      .            .       .
   1.6489    239(25)      .            .       .
   1.6499    248(25)      .            .       .
   1.6509    252(25)      .            .       .
   1.6519    243(25)      .            .       .
   1.6529    244(25)      .            .       .
   1.6539    228(24)      .            .       .
   1.6549    235(25)      .            .       .
   1.6559    240(25)      .            .       .
   1.6569    242(25)      .            .       .
   1.6579    257(26)      .            .       .
   1.6589    204(23)      .            .       .
   1.6599    213(23)      .            .       .
   1.6609    209(23)      .            .       .
   1.6619    231(25)      .            .       .
   1.6629    221(24)      .            .       .
   1.6639    233(25)      .            .       .
   1.6649    227(24)      .            .       .
   1.6659    208(23)      .            .       .
   1.6669    211(23)      .            .       .
   1.6679    224(24)      .            .       .
   1.6689    228(24)      .            .       .
   1.6699    231(25)      .            .       .
   1.6709    234(25)      .            .       .
   1.6719    214(24)      .            .       .
   1.6729    199(23)      .            .       .
   1.6739    207(23)      .            .       .
   1.6749    264(26)      .            .       .
   1.6759    251(25)      .            .       .
   1.6769    218(24)      .            .       .
   1.6779    234(25)      .            .       .
   1.6789    239(25)      .            .       .
   1.6799    216(24)      .            .       .
   1.6809    212(23)      .            .       .
   1.6819    215(24)      .            .       .
   1.6829    217(24)      .            .       .
   1.6839    238(25)      .            .       .
   1.6849    227(24)      .            .       .
   1.6859    204(23)      .            .       .
   1.6869    188(22)      .            .       .
   1.6879    213(24)      .            .       .
   1.6889    195(22)      .            .       .
   1.6899    181(22)      .            .       .
   1.6909    191(22)      .            .       .
   1.6919    228(24)      .            .       .
   1.6929    227(24)      .            .       .
   1.6939    220(24)      .            .       .
   1.6949    226(24)      .            .       .
   1.6959    237(25)      .            .       .
   1.6969    213(23)      .            .       .
   1.6979    202(23)      .            .       .
   1.6989    213(24)      .            .       .
   1.6999    204(23)      .            .       .
   1.7009    219(24)      .            .       .
   1.7019    226(24)      .            .       .
   1.7029    232(25)      .            .       .
   1.7039    231(25)      .            .       .
   1.7049    194(22)      .            .       .
   1.7059    212(23)      .            .       .
   1.7069    190(22)      .            .       .
   1.7079    201(23)      .            .       .
   1.7089    214(24)      .            .       .
   1.7099    207(23)      .            .       .
   1.7109    203(23)      .            .       .
   1.7119    229(24)      .            .       .
   1.7129    213(24)      .            .       .
   1.7139    218(24)      .            .       .
   1.7149    228(24)      .            .       .
   1.7159    218(24)      .            .       .
   1.7169    230(24)      .            .       .
   1.7179    209(23)      .            .       .
   1.7189    213(24)      .            .       .
   1.7199    210(23)      .            .       .
   1.7209    216(24)      .            .       .
   1.7219    178(21)      .            .       .
   1.7229    205(23)      .            .       .
   1.7239    227(24)      .            .       .
   1.7249    192(22)      .            .       .
   1.7259    196(23)      .            .       .
   1.7269    216(24)      .            .       .
   1.7279    208(23)      .            .       .
   1.7289    194(22)      .            .       .
   1.7299    175(21)      .            .       .
   1.7309    207(23)      .            .       .
   1.7319    205(23)      .            .       .
   1.7329    196(23)      .            .       .
   1.7339    190(22)      .            .       .
   1.7349    184(22)      .            .       .
   1.7359    209(23)      .            .       .
   1.7369    214(24)      .            .       .
   1.7379    202(23)      .            .       .
   1.7389    212(24)      .            .       .
   1.7399    188(22)      .            .       .
   1.7409    198(23)      .            .       .
   1.7419    193(22)      .            .       .
   1.7429    193(22)      .            .       .
   1.7439    230(24)      .            .       .
   1.7449    189(22)      .            .       .
   1.7459    203(23)      .            .       .
   1.7469    208(23)      .            .       .
   1.7479    217(24)      .            .       .
   1.7489    211(23)      .            .       .
   1.7499    219(24)      .            .       .
   1.7509    203(23)      .            .       .
   1.7519    202(23)      .            .       .
   1.7529    223(24)      .            .       .
   1.7539    195(22)      .            .       .
   1.7549    209(23)      .            .       .
   1.7559    201(23)      .            .       .
   1.7569    185(22)      .            .       .
   1.7579    181(22)      .            .       .
   1.7589    241(25)      .            .       .
   1.7599    182(22)      .            .       .
   1.7608    209(23)      .            .       .
   1.7618    195(22)      .            .       .
   1.7628    192(22)      .            .       .
   1.7638    208(23)      .            .       .
   1.7648    191(22)      .            .       .
   1.7658    185(22)      .            .       .
   1.7668    193(22)      .            .       .
   1.7678    220(24)      .            .       .
   1.7688    180(22)      .            .       .
   1.7698    184(22)      .            .       .
   1.7708    201(23)      .            .       .
   1.7718    210(23)      .            .       .
   1.7728    195(22)      .            .       .
   1.7738    221(24)      .            .       .
   1.7748    194(22)      .            .       .
   1.7758    213(23)      .            .       .
   1.7768    164(21)      .            .       .
   1.7778    177(21)      .            .       .
   1.7788    185(22)      .            .       .
   1.7798    164(21)      .            .       .
   1.7808    192(22)      .            .       .
   1.7818    223(24)      .            .       .
   1.7828    185(22)      .            .       .
   1.7838    211(23)      .            .       .
   1.7848    177(21)      .            .       .
   1.7858    200(23)      .            .       .
   1.7868    191(22)      .            .       .
   1.7878    227(24)      .            .       .
   1.7888    215(24)      .            .       .
   1.7898    197(23)      .            .       .
   1.7908    192(22)      .            .       .
   1.7918    179(22)      .            .       .
   1.7928    198(23)      .            .       .
   1.7938    206(23)      .            .       .
   1.7948    174(21)      .            .       .
   1.7958    176(21)      .            .       .
   1.7968    199(23)      .            .       .
   1.7978    184(22)      .            .       .
   1.7988    221(24)      .            .       .
   1.7998    194(22)      .            .       .
   1.8008    210(23)      .            .       .
   1.8018    213(23)       0.001814    103.2   148.1
   1.8028    183(22)       0.002108    103.2   148.2
   1.8038    186(22)       0.002075    103.2   148.2
   1.8048    203(23)       0.001906    103.2   148.3
   1.8058    234(25)       0.001640    103.2   148.4
   1.8068    201(23)       0.001915    103.3   148.5
   1.8078    222(24)       0.001737    103.3   148.6
   1.8088    164(20)       0.002426    103.3   148.7
   1.8098    183(22)       0.002148    103.3   148.7
   1.8108    174(21)       0.002225    103.3   148.8
   1.8118    185(22)       0.002078    103.3   148.9
   1.8128    211(23)       0.001819    103.3   149.0
   1.8138    180(22)       0.002144    103.3   149.1
   1.8148    156(20)       0.002486    103.3   149.1
   1.8158    194(22)       0.002014    103.3   149.2
   1.8168    204(23)       0.001883    103.3   149.3
   1.8178    180(22)       0.002131    103.3   149.4
   1.8188    165(21)       0.002343    103.3   149.5
   1.8198    171(21)       0.002268    103.3   149.5
   1.8208    219(24)       0.001758    103.3   149.6
   1.8218    203(23)       0.001895    103.3   149.7
   1.8228    202(23)       0.001907    103.3   149.8
   1.8238    167(21)       0.002289    103.3   149.8
   1.8248    180(22)       0.002143    103.4   149.9
   1.8258    193(22)       0.001996    103.4   150.0
   1.8268    196(22)       0.002004    103.4   150.1
   1.8278    183(22)       0.002137    103.4   150.2
   1.8288    202(23)       0.001907    103.4   150.2
   1.8298    167(21)       0.002306    103.4   150.3
   1.8308    186(22)       0.002072    103.4   150.4
   1.8318    212(23)       0.001819    103.4   150.5
   1.8328    172(21)       0.002247    103.4   150.5
   1.8338    169(21)       0.002285    103.4   150.6
   1.8348    190(22)       0.002051    103.4   150.7
   1.8358    194(22)       0.002002    103.4   150.8
   1.8368    185(22)       0.002078    103.4   150.8
   1.8378    163(21)       0.002348    103.4   150.9
   1.8388    185(22)       0.002077    103.4   151.0
   1.8398    157(20)       0.002445    103.4   151.0
   1.8408    219(24)       0.001764    103.4   151.1
   1.8418    198(23)       0.001940    103.5   151.2
   1.8428    210(23)       0.001823    103.5   151.3
   1.8438    191(22)       0.002008    103.5   151.3
   1.8448    203(23)       0.001912    103.5   151.4
   1.8458    165(21)       0.002330    103.5   151.5
   1.8468    213(24)       0.001810    103.5   151.6
   1.8478    206(23)       0.001875    103.5   151.6
   1.8488    197(23)       0.001950    103.5   151.7
   1.8498    207(23)       0.001859    103.5   151.8
   1.8508    192(22)       0.001994    103.5   151.8
   1.8518    204(23)       0.001885    103.5   151.9
   1.8528    187(22)       0.002057    103.5   152.0
   1.8538    188(22)       0.002056    103.5   152.0
   1.8548    174(21)       0.002219    103.5   152.1
   1.8558    195(22)       0.001982    103.5   152.2
   1.8568    199(23)       0.001937    103.5   152.3
   1.8578    169(21)       0.002337    103.5   152.3
   1.8588    156(20)       0.002499    103.6   152.4
   1.8598    160(20)       0.002417    103.6   152.5
   1.8608    193(22)       0.002002    103.6   152.5
   1.8618    175(21)       0.002173    103.6   152.6
   1.8628    176(21)       0.002186    103.6   152.7
   1.8638    176(21)       0.002189    103.6   152.7
   1.8648    151(20)       0.002540    103.6   152.8
   1.8658    197(23)       0.001948    103.6   152.9
   1.8668    176(21)       0.002227    103.6   152.9
   1.8678    220(24)       0.001775    103.6   153.0
   1.8688    173(21)       0.002233    103.6   153.1
   1.8698    203(23)       0.001909    103.6   153.1
   1.8708    194(22)       0.001991    103.6   153.2
   1.8718    194(22)       0.001992    103.6   153.3
   1.8728    175(21)       0.002192    103.6   153.3
   1.8738    184(22)       0.002087    103.6   153.4
   1.8748    206(23)       0.001869    103.6   153.5
   1.8758    181(22)       0.002116    103.7   153.5
   1.8768    169(21)       0.002292    103.7   153.6
   1.8778    185(22)       0.002087    103.7   153.6
   1.8788    174(21)       0.002216    103.7   153.7
   1.8798    174(21)       0.002229    103.7   153.8
   1.8808    196(23)       0.001972    103.7   153.8
   1.8818    176(21)       0.002187    103.7   153.9
   1.8828    154(20)       0.002488    103.7   154.0
   1.8838    168(21)       0.002292    103.7   154.0
   1.8848    225(24)       0.001707    103.7   154.1
   1.8858    167(21)       0.002339    103.7   154.1
   1.8868    154(20)       0.002518    103.7   154.2
   1.8878    163(21)       0.002375    103.7   154.3
   1.8888    184(22)       0.002090    103.7   154.3
   1.8898    226(24)       0.001709    103.7   154.4
   1.8908    193(22)       0.001996    103.7   154.4
   1.8918    188(22)       0.002047    103.7   154.5
   1.8928    185(22)       0.002078    103.7   154.6
   1.8938    160(20)       0.002392    103.8   154.6
   1.8948    169(21)       0.002273    103.8   154.7
   1.8958    173(21)       0.002215    103.8   154.7
   1.8968    163(21)       0.002351    103.8   154.8
   1.8978    179(22)       0.002162    103.8   154.9
   1.8988    215(24)       0.001793    103.8   154.9
   1.8998    180(22)       0.002137    103.8   155.0
   1.9008    201(23)       0.001907    103.8   155.0
   1.9018    196(23)       0.001964    103.8   155.1
   1.9028    140(19)       0.002759    103.8   155.2
   1.9038    167(21)       0.002321    103.8   155.2
   1.9048    186(22)       0.002080    103.8   155.3
   1.9058    177(21)       0.002188    103.8   155.3
   1.9068    171(21)       0.002259    103.8   155.4
   1.9078    201(23)       0.001925    103.8   155.4
   1.9088    198(23)       0.001950    103.8   155.5
   1.9098    239(25)       0.001632    103.8   155.5
   1.9108    142(19)       0.002719    103.9   155.6
   1.9118    175(21)       0.002191    103.9   155.7
   1.9128    178(21)       0.002173    103.9   155.7
   1.9138    209(23)       0.001859    103.9   155.8
   1.9148    151(20)       0.002555    103.9   155.8
   1.9158    173(21)       0.002235    103.9   155.9
   1.9168    190(22)       0.002028    103.9   155.9
   1.9178    169(21)       0.002273    103.9   156.0
   1.9188    193(22)       0.001992    103.9   156.0
   1.9198    194(22)       0.001987    103.9   156.1
   1.9208    177(21)       0.002191    103.9   156.1
   1.9218    171(21)       0.002259    103.9   156.2
   1.9228    164(21)       0.002362    103.9   156.2
   1.9238    200(23)       0.001929    103.9   156.3
   1.9248    196(23)       0.001974    103.9   156.3
   1.9258    180(22)       0.002148    103.9   156.4
   1.9268    198(23)       0.001951    103.9   156.5
   1.9278    213(24)       0.001809    103.9   156.5
   1.9288    137(19)       0.002846    104.0   156.6
   1.9298    156(20)       0.002473    104.0   156.6
   1.9308    176(21)       0.002190    104.0   156.7
   1.9318    169(21)       0.002312    104.0   156.7
   1.9328    168(21)       0.002310    104.0   156.8
   1.9338    181(22)       0.002150    104.0   156.8
   1.9348    180(22)       0.002148    104.0   156.9
   1.9358    225(24)       0.001722    104.0   156.9
   1.9368    207(23)       0.001879    104.0   157.0
   1.9378    194(22)       0.001983    104.0   157.0
   1.9388    180(22)       0.002136    104.0   157.0
   1.9398    191(22)       0.002007    104.0   157.1
   1.9408    163(21)       0.002358    104.0   157.1
   1.9418    162(20)       0.002393    104.0   157.2
   1.9428    185(22)       0.002080    104.0   157.2
   1.9438    186(22)       0.002069    104.0   157.3
   1.9448    176(21)       0.002183    104.0   157.3
   1.9458    182(22)       0.002113    104.1   157.4
   1.9468    186(22)       0.002077    104.1   157.4
   1.9478    196(22)       0.001980    104.1   159.9
   1.9488    146(19)       0.002661    104.1   160.0
   1.9498    190(22)       0.002031    104.1   160.1
   1.9508    187(22)       0.002069    104.1   160.2
   1.9518    157(20)       0.002448    104.1   160.3
   1.9528    172(21)       0.002239    104.1   160.5
   1.9538    193(22)       0.002000    104.1   160.6
   1.9548    150(20)       0.002621    104.1   160.7
   1.9558    192(22)       0.002025    104.1   160.8
   1.9568    192(22)       0.002020    104.1   161.0
   1.9578    208(23)       0.001860    104.1   161.1
   1.9588    176(21)       0.002197    104.1   161.3
   1.9598    161(20)       0.002406    104.1   161.4
   1.9608    197(23)       0.001968    104.1   161.5
   1.9618    200(23)       0.001941    104.1   161.7
   1.9628    169(21)       0.002293    104.1   161.9
   1.9638    155(20)       0.002482    104.2   162.0
   1.9648    174(21)       0.002257    104.2   162.2
   1.9658    163(20)       0.002397    104.2   162.4
   1.9668    178(21)       0.002177    104.2   162.6
   1.9678    163(21)       0.002347    104.2   162.8
   1.9688    143(19)       0.002696    104.2   163.0
   1.9698    204(23)       0.001892    104.2   163.2
   1.9708    180(21)       0.002169    104.2   163.4
   1.9718    171(21)       0.002254    104.2   163.6
   1.9728    178(22)       0.002155    104.2   163.9
   1.9738    157(20)       0.002420    104.2   164.1
   1.9748    158(20)       0.002429    104.2   164.4
   1.9758    169(21)       0.002262    104.2   164.7
   1.9768    182(22)       0.002117    104.2   164.9
   1.9778    189(22)       0.002035    104.2   165.3
   1.9788    174(21)       0.002222    104.2   165.6
   1.9798    176(21)       0.002213    104.2   165.9
   1.9808    193(22)       0.002004    104.3   166.3
   1.9818    186(22)       0.002086    104.3   166.7
   1.9828    170(21)       0.002276    104.3   167.1
   1.9838    183(22)       0.002108    104.3   167.5
   1.9848    177(21)       0.002190    104.3   168.0
   1.9858    192(22)       0.002009    104.3   168.5
   1.9868    162(21)       0.002374    104.3   169.1
   1.9878    153(20)       0.002527    104.3   169.7
   1.9888    158(20)       0.002476    104.3   170.3
   1.9898    182(22)       0.002122    104.3   171.0
   1.9908    190(22)       0.002047    104.3   171.7
   1.9918    175(21)       0.002239    104.3   172.5
   1.9928    184(22)       0.002091    104.3   173.4
   1.9938    153(20)       0.002531    104.3   174.4
   1.9948    168(21)       0.002292    104.3   175.5
   1.9958    203(23)       0.001889    104.3   176.6
   1.9968    215(24)       0.001783    104.3   177.9
   1.9978    184(22)       0.002096    104.4   179.4
   1.9988    203(23)       0.001895    104.4   181.0
   1.9998    206(20)       0.002465    104.4   182.8
   2.0008    195(20)       0.002614    104.4   184.8
   2.0018    216(21)       0.002349    104.4   187.1
   2.0028    189(19)       0.002700    104.4   189.7
   2.0038    200(20)       0.002531    104.4   192.6
   2.0048    219(21)       0.002309    104.4   196.1
   2.0058    213(21)       0.002366    104.4   200.0
   2.0068    207(20)       0.002450    104.4   204.7
   2.0078    212(20)       0.002394    104.4   210.1
   2.0088    228(21)       0.002214    104.4   216.6
   2.0098    243(22)       0.002081    104.4   224.5
   2.0108    269(23)       0.001877    104.4   234.1
   2.0118    277(23)       0.001827    104.4   246.4
   2.0128    304(25)       0.001662    104.4   263.1
   2.0138    364(27)       0.001388    104.4   288.1
   2.0148    385(28)       0.001322    104.4   330.2
   2.0158    495(31)       0.001023    104.5   406.6
   2.0168    732(38)       0.000694    104.    548.
   2.0178    1052(46)      0.000480    104.    799.
   2.0188    1426(53)      0.000356    104.    1215.
   2.0198    2016(63)      0.0002510   104.    1837.
   2.0208    2630(72)      0.0001919   104.    2657.
   2.0218    3437(82)      0.0001471   104.    3585.
   2.0228    4360(93)      0.0001157   104.    4437.
   2.0238    4904(99)      0.0001027   104.    4971.
   2.0248    5120(100)     0.0000986   105.    4983.
   2.0258    4742(97)      0.0001065   105.    4451.
   2.0268    3666(85)      0.0001386   105.    3576.
   2.0278    2337(67)      0.0002203   105.    2623.
   2.0288    1348(51)      0.000382    105.    1790.
   2.0298    864(41)       0.000589    105.    1168.
   2.0308    583(34)       0.000875    104.5   759.8
   2.0318    462(30)       0.001095    104.5   519.8
   2.0328    386(28)       0.001310    104.5   389.5
   2.0338    335(26)       0.001514    104.6   321.0
   2.0348    261(23)       0.001963    104.6   283.7
   2.0358    243(22)       0.002079    104.6   261.0
   2.0368    254(22)       0.001987    104.6   245.5
   2.0378    227(21)       0.002241    104.6   233.8
   2.0388    217(21)       0.002344    104.6   224.5
   2.0398    196(20)       0.002580    104.6   216.9
   2.0408    178(19)       0.002849    104.6   210.5
   2.0418    201(20)       0.002520    104.6   205.2
   2.0428    196(20)       0.002577    104.6   200.7
   2.0438    189(19)       0.002685    104.6   196.9
   2.0448    174(18)       0.002928    104.6   193.5
   2.0458    190(19)       0.002660    104.6   190.7
   2.0468    192(19)       0.002645    104.6   188.2
   2.0478    191(19)       0.002663    104.6   185.9
   2.0488    189(19)       0.002691    104.6   184.0
   2.0498    192(20)       0.002625    104.6   182.3
   2.0508    201(20)       0.002505    104.7   180.8
   2.0518    189(19)       0.002682    104.7   179.4
   2.0528    188(19)       0.002694    104.7   178.2
   2.0538    180(19)       0.002805    104.7   177.1
   2.0548    174(18)       0.002926    104.7   176.1
   2.0558    153(17)       0.003318    104.7   175.2
   2.0568    143(17)       0.00356     104.7   174.3
   2.0578    177(19)       0.002856    104.7   173.6
   2.0588    189(19)       0.002674    104.7   172.9
   2.0598    183(19)       0.002788    104.7   172.3
   2.0608    181(19)       0.002818    104.7   171.7
   2.0618    175(19)       0.002891    104.7   171.2
   2.0628    193(19)       0.002630    104.7   170.7
   2.0638    169(18)       0.003026    104.7   170.2
   2.0648    184(19)       0.002771    104.7   169.8
   2.0658    179(19)       0.002835    104.7   169.4
   2.0668    168(18)       0.003020    104.7   169.1
   2.0678    180(19)       0.002805    104.7   168.8
   2.0688    182(19)       0.002766    104.8   168.5
   2.0698    168(18)       0.002986    104.8   168.2
   2.0708    163(18)       0.003101    104.8   167.9
   2.0718    146(17)       0.003477    104.8   167.6
   2.0728    163(18)       0.003113    104.8   167.4
   2.0738    188(19)       0.002674    104.8   167.2
   2.0748    193(20)       0.002617    104.8   167.0
   2.0758    191(19)       0.002651    104.8   166.8
   2.0768    171(18)       0.002953    104.8   166.6
   2.0778    179(19)       0.002812    104.8   166.4
   2.0788    179(19)       0.002822    104.8   166.3
   2.0798    170(18)       0.002968    104.8   166.1
   2.0808    186(19)       0.002713    104.8   166.0
   2.0818    166(18)       0.003057    104.8   165.9
   2.0828    174(19)       0.002909    104.8   165.7
   2.0838    160(18)       0.003164    104.8   165.6
   2.0848    182(19)       0.002785    104.8   165.5
   2.0858    178(19)       0.002861    104.9   165.4
   2.0868    176(19)       0.002904    104.9   165.3
   2.0878    193(19)       0.002642    104.9   165.2
   2.0888    157(18)       0.003253    104.9   165.1
   2.0898    166(18)       0.003048    104.9   165.0
   2.0908    171(18)       0.002933    104.9   164.9
   2.0918    142(17)       0.00357     104.9   164.8
   2.0928    149(17)       0.003415    104.9   164.8
   2.0938    176(19)       0.002839    104.9   164.7
   2.0948    154(17)       0.003297    104.9   164.6
   2.0958    163(18)       0.003093    104.9   164.6
   2.0968    151(17)       0.003356    104.9   164.5
   2.0978    148(17)       0.003410    104.9   164.4
   2.0988    144(17)       0.003505    104.9   164.4
   2.0998    166(18)       0.003046    104.9   164.3
   2.1008    174(19)       0.002899    104.9   164.3
   2.1018    165(18)       0.003062    104.9   164.2
   2.1028    199(20)       0.002521    104.9   161.9
   2.1038    166(18)       0.003055    105.0   161.9
   2.1048    167(18)       0.003034    105.0   161.9
   2.1058    150(17)       0.003402    105.0   161.9
   2.1068    159(18)       0.003206    105.0   161.9
   2.1078    189(19)       0.002670    105.0   162.0
   2.1088    174(19)       0.002911    105.0   162.0
   2.1098    184(19)       0.002748    105.0   162.0
   2.1108    152(17)       0.003345    105.0   162.0
   2.1118    170(18)       0.002980    105.0   162.0
   2.1128    166(18)       0.003054    105.0   162.0
   2.1138    175(19)       0.002891    105.0   162.0
   2.1148    160(18)       0.003178    105.0   162.0
   2.1158    155(17)       0.003268    105.0   162.0
   2.1168    161(18)       0.003126    105.0   162.0
   2.1178    142(17)       0.00355     105.0   162.1
   2.1188    175(19)       0.002881    105.0   162.1
   2.1198    172(18)       0.002940    105.0   162.1
   2.1208    167(18)       0.003017    105.0   162.1
   2.1218    135(16)       0.00377     105.1   162.1
   2.1228    154(17)       0.003298    105.1   162.1
   2.1238    162(18)       0.003138    105.1   162.1
   2.1248    150(17)       0.003377    105.1   162.1
   2.1258    124(16)       0.00407     105.1   162.1
   2.1268    150(17)       0.003367    105.1   162.1
   2.1278    168(18)       0.002998    105.1   162.1
   2.1288    167(18)       0.003032    105.1   162.1
   2.1298    161(18)       0.003157    105.1   162.2
   2.1308    158(18)       0.003195    105.1   162.2
   2.1318    172(19)       0.002921    105.1   162.2
   2.1328    163(18)       0.003105    105.1   162.2
   2.1338    167(18)       0.003033    105.1   162.2
   2.1348    163(18)       0.003109    105.1   162.2
   2.1358    139(17)       0.00364     105.1   162.2
   2.1368    162(18)       0.003130    105.1   162.2
   2.1378    135(16)       0.00377     105.1   162.2
   2.1388    150(17)       0.003432    105.2   162.2
   2.1398    169(18)       0.003013    105.2   162.2
   2.1408    144(17)       0.003506    105.2   162.2
   2.1418    152(17)       0.003328    105.2   162.2
   2.1428    186(19)       0.002718    105.2   162.2
   2.1438    171(18)       0.002986    105.2   162.2
   2.1448    154(17)       0.003291    105.2   162.2
   2.1458    158(18)       0.003254    105.2   162.2
   2.1468    154(17)       0.003313    105.2   162.2
   2.1478    151(17)       0.003352    105.2   162.2
   2.1488    153(17)       0.003292    105.2   162.2
   2.1498    180(19)       0.002787    105.2   162.2
   2.1508    158(18)       0.003183    105.2   162.3
   2.1518    160(18)       0.003151    105.2   162.3
   2.1528    143(17)       0.00353     105.2   162.3
   2.1538    162(18)       0.003129    105.2   162.3
   2.1548    173(18)       0.002941    105.2   162.3
   2.1558    140(17)       0.00362     105.2   162.3
   2.1568    147(17)       0.003423    105.3   162.3
   2.1578    154(17)       0.003275    105.3   162.3
   2.1588    148(17)       0.003378    105.3   162.3
   2.1598    162(18)       0.003123    105.3   162.3
   2.1608    169(18)       0.002991    105.3   162.3
   2.1618    156(18)       0.003232    105.3   162.3
   2.1628    142(17)       0.00356     105.3   162.3
   2.1638    155(18)       0.003262    105.3   162.3
   2.1648    158(18)       0.003224    105.3   162.3
   2.1658    169(18)       0.003038    105.3   162.3
   2.1668    156(17)       0.003268    105.3   162.3
   2.1678    166(18)       0.003041    105.3   162.3
   2.1688    187(19)       0.002710    105.3   162.3
   2.1698    163(18)       0.003126    105.3   162.3
   2.1708    146(17)       0.003496    105.3   162.3
   2.1718    164(18)       0.003083    105.3   162.3
   2.1728    180(19)       0.002792    105.3   162.3
   2.1738    139(17)       0.00365     105.3   162.3
   2.1748    152(17)       0.003319    105.4   162.3
   2.1758    158(18)       0.003205    105.4   162.3
   2.1768    162(18)       0.003112    105.4   162.3
   2.1778    157(18)       0.003220    105.4   162.3
   2.1788    169(18)       0.002988    105.4   162.3
   2.1798    156(18)       0.003245    105.4   162.3
   2.1808    145(17)       0.00352     105.4   162.3
   2.1818    151(17)       0.003376    105.4   162.3
   2.1828    160(18)       0.003156    105.4   162.3
   2.1838    165(18)       0.003061    105.4   162.2
   2.1848    162(18)       0.003121    105.4   162.2
   2.1858    162(18)       0.003164    105.4   162.2
   2.1868    150(17)       0.003413    105.4   162.2
   2.1878    156(18)       0.003237    105.4   162.2
   2.1888    168(18)       0.002982    105.4   162.2
   2.1898    155(18)       0.003244    105.4   162.2
   2.1908    146(17)       0.003472    105.4   162.2
   2.1918    150(17)       0.003365    105.4   162.2
   2.1928    166(18)       0.003044    105.5   162.2
   2.1938    144(17)       0.00355     105.5   162.2
   2.1948    140(17)       0.00366     105.5   162.2
   2.1958    142(17)       0.00354     105.5   162.2
   2.1968    139(16)       0.00369     105.5   162.2
   2.1978    147(17)       0.003476    105.5   162.2
   2.1988    164(18)       0.003084    105.5   162.2
   2.1998    153(17)       0.003314    105.5   162.2
   2.2008    161(18)       0.003152    105.5   162.2
   2.2018    163(18)       0.003098    105.5   162.2
   2.2028    176(19)       0.002866    105.5   162.2
   2.2038    156(18)       0.003265    105.5   162.2
   2.2048    165(18)       0.003084    105.5   162.1
   2.2058    164(18)       0.003079    105.5   162.1
   2.2068    169(18)       0.003004    105.5   162.1
   2.2078    162(18)       0.003149    105.5   162.1
   2.2088    174(19)       0.002904    105.5   162.1
   2.2098    141(17)       0.00360     105.5   162.1
   2.2108    165(18)       0.003084    105.6   162.1
   2.2118    161(18)       0.003154    105.6   162.1
   2.2128    143(17)       0.00357     105.6   162.1
   2.2138    167(18)       0.003011    105.6   162.1
   2.2148    178(19)       0.002833    105.6   162.1
   2.2158    146(17)       0.003470    105.6   162.1
   2.2168    149(17)       0.003446    105.6   162.1
   2.2178    173(18)       0.002946    105.6   162.0
   2.2188    161(18)       0.003195    105.6   162.0
   2.2198    157(17)       0.003275    105.6   162.0
   2.2208    157(18)       0.003247    105.6   162.0
   2.2218    149(17)       0.003435    105.6   162.0
   2.2228    142(17)       0.00360     105.6   162.0
   2.2238    123(16)       0.00411     105.6   162.0
   2.2248    149(17)       0.003441    105.6   162.0
   2.2258    152(17)       0.003362    105.6   162.0
   2.2268    153(17)       0.003314    105.6   162.0
   2.2278    145(17)       0.00353     105.7   162.0
   2.2288    148(17)       0.003443    105.7   161.9
   2.2298    149(17)       0.003423    105.7   161.9
   2.2308    150(17)       0.003415    105.7   161.9
   2.2318    143(17)       0.00351     105.7   161.9
   2.2328    155(17)       0.003319    105.7   161.9
   2.2338    183(19)       0.002788    105.7   161.9
   2.2348    163(18)       0.003129    105.7   161.9
   2.2358    140(17)       0.00365     105.7   161.9
   2.2368    141(17)       0.00359     105.7   161.9
   2.2378    146(17)       0.003488    105.7   161.8
   2.2388    144(17)       0.003499    105.7   161.8
   2.2398    136(16)       0.00372     105.7   161.8
   2.2408    137(16)       0.00373     105.7   161.8
   2.2418    134(16)       0.00379     105.7   161.8
   2.2428    121(15)       0.00419     105.7   161.8
   2.2438    138(17)       0.00366     105.7   161.8
   2.2448    162(18)       0.003130    105.7   161.8
   2.2458    165(18)       0.003068    105.8   161.7
   2.2468    125(16)       0.00407     105.8   161.7
   2.2478    138(16)       0.00368     105.8   161.7
   2.2488    145(17)       0.003479    105.8   161.7
   2.2498    149(17)       0.003385    105.8   161.7
   2.2508    129(16)       0.00395     105.8   161.7
   2.2518    144(17)       0.00351     105.8   161.7
   2.2528    150(17)       0.003361    105.8   161.6
   2.2538    149(17)       0.003397    105.8   161.6
   2.2548    158(18)       0.003171    105.8   161.6
   2.2558    166(18)       0.003057    105.8   161.6
   2.2568    171(18)       0.002963    105.8   161.6
   2.2578    151(17)       0.003375    105.8   161.6
   2.2588    138(16)       0.00368     105.8   161.6
   2.2598    124(16)       0.00414     105.8   161.5
   2.2608    136(16)       0.00380     105.8   161.5
   2.2618    169(18)       0.003024    105.8   161.5
   2.2628    151(17)       0.003371    105.8   161.5
   2.2638    146(17)       0.003504    105.9   161.5
   2.2648    139(17)       0.00362     105.9   161.5
   2.2658    170(18)       0.002957    105.9   161.5
   2.2668    160(18)       0.003190    105.9   161.4
   2.2678    170(18)       0.002974    105.9   161.4
   2.2688    160(18)       0.003168    105.9   161.4
   2.2698    167(18)       0.003022    105.9   161.4
   2.2708    160(18)       0.003170    105.9   161.4
   2.2718    166(18)       0.003061    105.9   161.4
   2.2728    168(18)       0.003023    105.9   161.3
   2.2738    172(18)       0.002959    105.9   161.3
   2.2748    175(19)       0.002873    105.9   161.3
   2.2758    162(18)       0.003140    105.9   161.3
   2.2768    140(17)       0.00366     105.9   161.3
   2.2778    158(18)       0.003230    105.9   161.3
   2.2788    147(17)       0.003456    105.9   161.2
   2.2798    150(17)       0.003376    105.9   161.2
   2.2808    162(18)       0.003100    105.9   161.2
   2.2818    134(16)       0.00377     106.0   161.2
   2.2828    136(16)       0.00370     106.0   161.2
   2.2838    150(17)       0.003398    106.0   161.1
   2.2848    168(18)       0.003026    106.0   161.1
   2.2858    142(17)       0.00364     106.0   161.1
   2.2868    122(15)       0.00421     106.0   161.1
   2.2878    153(17)       0.003321    106.0   161.1
   2.2888    165(18)       0.003063    106.0   161.1
   2.2898    159(18)       0.003176    106.0   161.0
   2.2908    154(17)       0.003288    106.0   161.0
   2.2918    164(18)       0.003101    106.0   161.0
   2.2928    167(18)       0.003040    106.0   161.0
   2.2938    154(17)       0.003281    106.0   161.0
   2.2948    145(17)       0.00351     106.0   160.9
   2.2958    154(17)       0.003329    106.0   160.9
   2.2968    160(18)       0.003173    106.0   160.9
   2.2978    138(17)       0.00367     106.0   160.9
   2.2988    146(17)       0.003475    106.0   160.9
   2.2998    146(17)       0.003482    106.1   160.8
   2.3008    148(17)       0.003416    106.1   160.8
   2.3018    148(17)       0.003427    106.1   160.8
   2.3028    140(17)       0.00361     106.1   160.8
   2.3038    132(16)       0.00386     106.1   160.8
   2.3048    133(16)       0.00384     106.1   160.7
   2.3058    150(17)       0.003404    106.1   160.7
   2.3068    163(18)       0.003145    106.1   160.7
   2.3078    150(17)       0.003423    106.1   160.7
   2.3088    138(16)       0.00371     106.1   160.6
   2.3098    146(17)       0.003504    106.1   160.6
   2.3108    150(17)       0.003374    106.1   160.6
   2.3118    163(18)       0.003105    106.1   160.6
   2.3128    154(17)       0.003314    106.1   160.6
   2.3138    157(18)       0.003213    106.1   160.5
   2.3148    158(18)       0.003209    106.1   160.5
   2.3158    143(17)       0.00359     106.1   160.5
   2.3168    134(16)       0.00380     106.1   160.5
   2.3178    137(16)       0.00369     106.2   160.4
   2.3188    152(17)       0.003320    106.2   160.4
   2.3198    170(18)       0.002974    106.2   160.4
   2.3208    147(17)       0.003447    106.2   160.4
   2.3218    155(17)       0.003301    106.2   160.4
   2.3228    167(18)       0.003049    106.2   160.3
   2.3238    140(17)       0.00361     106.2   160.3
   2.3248    140(17)       0.00362     106.2   160.3
   2.3258    151(17)       0.003379    106.2   160.3
   2.3268    158(18)       0.003205    106.2   160.2
   2.3278    152(17)       0.003342    106.2   160.2
   2.3288    167(18)       0.003019    106.2   160.2
   2.3298    169(18)       0.003005    106.2   160.2
   2.3308    148(17)       0.003411    106.2   160.1
   2.3318    153(17)       0.003304    106.2   160.1
   2.3328    154(17)       0.003291    106.2   160.1
   2.3338    145(17)       0.003494    106.2   160.1
   2.3348    162(18)       0.003152    106.2   160.0
   2.3358    179(19)       0.002856    106.3   160.0
   2.3368    186(19)       0.002728    106.3   160.0
   2.3378    165(18)       0.003082    106.3   160.0
   2.3388    160(18)       0.003139    106.3   159.9
   2.3398    149(17)       0.003411    106.3   159.9
   2.3408    150(17)       0.003388    106.3   159.9
   2.3418    147(17)       0.003444    106.3   159.9
   2.3428    159(18)       0.003191    106.3   159.8
   2.3438    164(18)       0.003102    106.3   159.8
   2.3448    147(17)       0.003468    106.3   159.8
   2.3458    139(17)       0.00361     106.3   159.8
   2.3468    157(18)       0.003213    106.3   159.7
   2.3478    156(18)       0.003240    106.3   159.7
   2.3488    152(17)       0.003335    106.3   159.7
   2.3498    160(18)       0.003157    106.3   159.7
   2.3508    162(18)       0.003133    106.3   159.6
   2.3518    150(17)       0.003412    106.3   159.6
   2.3528    120(15)       0.00420     106.3   159.6
   2.3538    133(16)       0.00380     106.4   159.6
   2.3548    142(17)       0.00361     106.4   159.5
   2.3558    140(17)       0.00363     106.4   159.5
   2.3568    165(18)       0.003059    106.4   159.5
   2.3578    161(18)       0.003145    106.4   159.4
   2.3588    149(17)       0.003383    106.4   159.4
   2.3598    170(18)       0.002968    106.4   159.4
   2.3608    172(18)       0.002947    106.4   159.4
   2.3618    138(17)       0.00365     106.4   159.3
   2.3628    148(17)       0.003445    106.4   159.3
   2.3638    156(17)       0.003289    106.4   159.3
   2.3648    155(18)       0.003259    106.4   159.3
   2.3658    165(18)       0.003074    106.4   159.2
   2.3668    159(18)       0.003191    106.4   159.2
   2.3678    167(18)       0.003037    106.4   159.2
   2.3688    148(17)       0.003397    106.4   159.1
   2.3698    144(17)       0.00351     106.4   159.1
   2.3708    130(16)       0.00389     106.4   159.1
   2.3718    130(16)       0.00388     106.5   159.1
   2.3728    158(18)       0.003210    106.5   159.0
   2.3738    143(17)       0.00351     106.5   159.0
   2.3748    144(17)       0.00351     106.5   159.0
   2.3758    169(18)       0.003019    106.5   158.9
   2.3768    179(19)       0.002821    106.5   158.9
   2.3778    181(19)       0.002809    106.5   158.9
   2.3788    176(19)       0.002887    106.5   158.9
   2.3798    166(18)       0.003025    106.5   158.8
   2.3808    171(18)       0.002956    106.5   158.8
   2.3818    158(18)       0.003220    106.5   158.8
   2.3828    131(16)       0.00389     106.5   158.7
   2.3838    120(15)       0.00425     106.5   158.7
   2.3848    141(17)       0.00361     106.5   158.7
   2.3858    147(17)       0.003477    106.5   158.6
   2.3868    153(17)       0.003323    106.5   158.6
   2.3878    148(17)       0.003420    106.5   158.6
   2.3888    137(16)       0.00369     106.5   158.6
   2.3898    144(17)       0.00352     106.6   158.5
   2.3908    153(17)       0.003339    106.6   158.5
   2.3918    154(17)       0.003330    106.6   158.5
   2.3928    136(16)       0.00379     106.6   158.4
   2.3938    149(17)       0.003377    106.6   158.4
   2.3948    143(17)       0.00357     106.6   158.4
   2.3958    131(16)       0.00387     106.6   158.3
   2.3968    133(16)       0.00381     106.6   158.3
   2.3978    165(18)       0.003078    106.6   158.3
   2.3988    157(18)       0.003262    106.6   158.2
   2.3998    128(16)       0.00398     106.6   158.2
   2.4008    144(17)       0.00356     106.6   158.2
   2.4018    141(17)       0.00361     106.6   158.2
   2.4028    144(17)       0.003505    106.6   158.1
   2.4038    152(17)       0.003326    106.6   158.1
   2.4048    153(17)       0.003320    106.6   158.1
   2.4058    157(17)       0.003266    106.6   158.0
   2.4068    117(15)       0.00434     106.6   158.0
   2.4078    136(16)       0.00374     106.7   158.0
   2.4088    152(17)       0.003321    106.7   157.9
   2.4098    150(17)       0.003361    106.7   157.9
   2.4108    168(18)       0.003026    106.7   157.9
   2.4118    180(19)       0.002798    106.7   157.8
   2.4128    144(17)       0.00354     106.7   157.8
   2.4138    152(17)       0.003401    106.7   157.8
   2.4148    154(17)       0.003297    106.7   157.7
   2.4158    148(17)       0.003405    106.7   157.7
   2.4168    155(18)       0.003262    106.7   157.7
   2.4178    129(16)       0.00392     106.7   157.6
   2.4188    155(17)       0.003303    106.7   157.6
   2.4198    160(18)       0.003186    106.7   157.6
   2.4208    155(17)       0.003275    106.7   157.5
   2.4218    175(19)       0.002872    106.7   157.5
   2.4228    165(18)       0.003061    106.7   157.5
   2.4238    141(17)       0.00359     106.7   157.4
   2.4248    137(16)       0.00368     106.7   157.4
   2.4258    135(16)       0.00377     106.7   157.4
   2.4268    137(16)       0.00369     106.8   157.3
   2.4278    130(16)       0.00392     106.8   157.3
   2.4288    138(17)       0.00366     106.8   157.3
   2.4298    165(18)       0.003056    106.8   157.2
   2.4308    174(19)       0.002914    106.8   157.2
   2.4318    144(17)       0.00352     106.8   157.2
   2.4328    123(16)       0.00412     106.8   157.1
   2.4338    166(18)       0.003052    106.8   157.1
   2.4348    155(17)       0.003293    106.8   157.1
   2.4358    126(16)       0.00403     106.8   157.0
   2.4368    143(17)       0.00355     106.8   157.0
   2.4378    141(17)       0.00362     106.8   157.0
   2.4388    142(17)       0.00354     106.8   156.9
   2.4398    142(17)       0.00355     106.8   156.9
   2.4408    127(16)       0.00400     106.8   156.9
   2.4418    138(17)       0.00366     106.8   156.8
   2.4428    169(18)       0.002956    106.8   156.8
   2.4438    164(18)       0.003077    106.8   156.8
   2.4448    146(17)       0.003468    106.9   156.7
   2.4458    144(17)       0.00353     106.9   156.7
   2.4468    145(17)       0.00352     106.9   156.7
   2.4478    160(18)       0.003158    106.9   156.6
   2.4488    155(18)       0.003236    106.9   156.6
   2.4498    145(17)       0.003477    106.9   156.6
   2.4508    167(18)       0.003031    106.9   156.5
   2.4518    162(18)       0.003117    106.9   156.5
   2.4528    175(19)       0.002889    106.9   156.5
   2.4538    155(18)       0.003261    106.9   156.4
   2.4548    131(16)       0.00386     106.9   156.4
   2.4558    147(17)       0.003470    106.9   156.3
   2.4568    140(17)       0.00364     106.9   156.3
   2.4578    138(17)       0.00366     106.9   156.3
   2.4588    167(18)       0.003033    106.9   156.2
   2.4598    132(16)       0.00384     106.9   156.2
   2.4608    120(15)       0.00424     106.9   156.2
   2.4618    147(17)       0.003455    106.9   156.1
   2.4628    184(19)       0.002741    107.0   156.1
   2.4638    193(20)       0.002612    107.0   156.1
   2.4648    159(18)       0.003197    107.0   156.0
   2.4658    133(16)       0.00380     107.0   156.0
   2.4668    127(16)       0.00395     107.0   155.9
   2.4678    127(16)       0.00395     107.0   155.9
   2.4688    143(17)       0.00354     107.0   155.9
   2.4698    148(17)       0.003426    107.0   155.8
   2.4708    153(17)       0.003320    107.0   155.8
   2.4718    173(19)       0.002902    107.0   155.8
   2.4728    152(17)       0.003313    107.0   155.7
   2.4738    160(18)       0.003172    107.0   155.7
   2.4748    124(16)       0.00409     107.0   155.7
   2.4758    155(17)       0.003269    107.0   155.6
   2.4768    149(17)       0.003379    107.0   155.6
   2.4778    128(16)       0.00392     107.0   155.5
   2.4788    151(17)       0.003354    107.0   155.5
   2.4798    122(15)       0.00421     107.0   155.5
   2.4808    169(18)       0.003001    107.1   155.4
   2.4818    135(16)       0.00369     107.1   155.4
   2.4828    141(17)       0.00358     107.1   155.4
   2.4838    136(16)       0.00372     107.1   155.3
   2.4848    149(17)       0.003382    107.1   155.3
   2.4858    156(18)       0.003264    107.1   155.3
   2.4868    165(18)       0.003085    107.1   155.2
   2.4878    156(18)       0.003212    107.1   155.2
   2.4888    131(16)       0.00390     107.1   155.1
   2.4898    123(16)       0.00411     107.1   155.1
   2.4908    150(17)       0.003357    107.1   155.1
   2.4918    149(17)       0.003389    107.1   155.0
   2.4928    142(17)       0.00360     107.1   155.0
   2.4938    137(16)       0.00369     107.1   155.0
   2.4948    135(16)       0.00373     107.1   154.9
   2.4958    158(18)       0.003235    107.1   154.9
   2.4968    141(16)       0.00368     107.1   154.8
   2.4978    134(16)       0.00376     107.1   154.8
   2.4988    152(17)       0.003332    107.2   154.8
   2.4998    137(17)       0.00366     107.2   154.7
   2.5008    164(18)       0.003049    107.2   154.7
   2.5018    129(16)       0.00391     107.2   154.7
   2.5028    136(16)       0.00373     107.2   154.6
   2.5038    145(17)       0.003474    107.2   154.6
   2.5048    166(18)       0.003038    107.2   154.5
   2.5058    142(17)       0.00358     107.2   154.5
   2.5068    166(18)       0.003038    107.2   154.5
   2.5078    151(17)       0.003348    107.2   154.4
   2.5088    138(17)       0.00366     107.2   154.4
   2.5098    156(18)       0.003246    107.2   154.3
   2.5108    166(18)       0.003048    107.2   154.3
   2.5118    171(18)       0.002963    107.2   154.3
   2.5128    140(17)       0.00358     107.2   154.2
   2.5138    139(17)       0.00361     107.2   154.2
   2.5148    139(17)       0.00363     107.2   154.2
   2.5158    133(16)       0.00383     107.2   154.1
   2.5168    138(17)       0.00367     107.2   154.1
   2.5178    150(17)       0.003341    107.3   154.0
   2.5188    155(17)       0.003282    107.3   154.0
   2.5198    149(17)       0.003396    107.3   154.0
   2.5208    162(18)       0.003153    107.3   153.9
   2.5218    121(15)       0.00417     107.3   153.9
   2.5228    149(17)       0.003389    107.3   153.8
   2.5238    136(16)       0.00371     107.3   153.8
   2.5248    135(16)       0.00372     107.3   153.8
   2.5258    126(16)       0.00404     107.3   153.7
   2.5268    153(17)       0.003345    107.3   153.7
   2.5278    162(18)       0.003096    107.3   153.6
   2.5288    146(17)       0.003444    107.3   153.6
   2.5298    149(17)       0.003404    107.3   153.6
   2.5308    147(17)       0.003470    107.3   153.5
   2.5318    134(16)       0.00378     107.3   153.5
   2.5328    156(18)       0.003211    107.3   153.5
   2.5338    166(18)       0.003029    107.3   153.4
   2.5348    135(16)       0.00373     107.3   153.4
   2.5358    146(17)       0.00352     107.4   153.3
   2.5368    155(17)       0.003272    107.4   153.3
   2.5378    162(18)       0.003115    107.4   153.3
   2.5388    183(19)       0.002757    107.4   153.2
   2.5398    141(17)       0.00358     107.4   153.2
   2.5408    140(17)       0.00359     107.4   153.1
   2.5418    143(17)       0.00352     107.4   153.1
   2.5428    137(17)       0.00367     107.4   153.1
   2.5438    117(15)       0.00435     107.4   153.0
   2.5448    135(16)       0.00379     107.4   153.0
   2.5458    124(16)       0.00411     107.4   152.9
   2.5468    132(16)       0.00382     107.4   152.9
   2.5478    133(16)       0.00379     107.4   152.9
   2.5488    169(18)       0.003030    107.4   152.8
   2.5498    119(15)       0.00427     107.4   152.8
   2.5508    143(17)       0.00354     107.4   152.7
   2.5518    161(18)       0.003156    107.4   152.7
   2.5528    163(18)       0.003093    107.4   152.7
   2.5538    136(16)       0.00372     107.5   152.6
   2.5548    142(17)       0.00353     107.5   152.6
   2.5558    142(17)       0.00358     107.5   152.5
   2.5568    136(16)       0.00373     107.5   152.5
   2.5578    114(15)       0.00443     107.5   152.5
   2.5588    108(15)       0.00466     107.5   152.4
   2.5598    154(17)       0.003276    107.5   152.4
   2.5608    160(18)       0.003154    107.5   152.3
   2.5618    134(16)       0.00379     107.5   152.3
   2.5628    160(18)       0.003172    107.5   152.3
   2.5638    135(16)       0.00372     107.5   152.2
   2.5648    124(16)       0.00405     107.5   152.2
   2.5658    125(16)       0.00405     107.5   152.1
   2.5668    138(17)       0.00365     107.5   152.1
   2.5678    164(18)       0.003086    107.5   152.1
   2.5688    146(17)       0.003483    107.5   152.0
   2.5698    154(17)       0.003285    107.5   152.0
   2.5708    158(18)       0.003201    107.5   151.9
   2.5718    148(17)       0.003403    107.5   151.9
   2.5728    149(17)       0.003398    107.6   151.9
   2.5738    162(18)       0.003114    107.6   151.8
   2.5748    135(16)       0.00373     107.6   151.8
   2.5758    123(16)       0.00408     107.6   151.7
   2.5768    137(16)       0.00371     107.6   151.7
   2.5778    157(18)       0.003233    107.6   151.7
   2.5788    134(16)       0.00378     107.6   151.6
   2.5798    131(16)       0.00387     107.6   151.6
   2.5808    134(16)       0.00382     107.6   151.5
   2.5818    143(17)       0.00355     107.6   151.5
   2.5828    151(17)       0.003322    107.6   151.5
   2.5838    140(17)       0.00364     107.6   151.4
   2.5848    135(16)       0.00382     107.6   151.4
   2.5858    160(18)       0.003191    107.6   151.3
   2.5868    151(17)       0.003325    107.6   151.3
   2.5878    137(16)       0.00368     107.6   151.3
   2.5888    126(16)       0.00402     107.6   151.2
   2.5898    153(17)       0.003335    107.6   151.2
   2.5908    151(17)       0.003374    107.7   151.1
   2.5918    134(16)       0.00378     107.7   151.1
   2.5928    121(15)       0.00419     107.7   151.1
   2.5938    109(15)       0.00466     107.7   151.0
   2.5948    146(17)       0.003425    107.7   151.0
   2.5958    148(17)       0.003387    107.7   150.9
   2.5968    129(16)       0.00390     107.7   150.9
   2.5978    146(17)       0.003462    107.7   150.9
   2.5988    161(18)       0.003139    107.7   150.8
   2.5998    164(18)       0.003105    107.7   150.8
   2.6007    156(18)       0.003247    107.7   150.7
   2.6017    129(16)       0.00389     107.7   150.7
   2.6027    136(16)       0.00369     107.7   150.7
   2.6037    155(18)       0.003240    107.7   150.6
   2.6047    148(17)       0.003413    107.7   150.6
   2.6057    120(15)       0.00425     107.7   150.5
   2.6067    125(16)       0.00401     107.7   150.5
   2.6077    126(16)       0.00400     107.7   150.4
   2.6087    132(16)       0.00382     107.7   150.4
   2.6097    126(16)       0.00403     107.8   150.4
   2.6107    155(17)       0.003295    107.8   150.3
   2.6117    160(18)       0.003138    107.8   150.3
   2.6127    148(17)       0.003454    107.8   150.2
   2.6137    124(16)       0.00410     107.8   150.2
   2.6147    132(16)       0.00387     107.8   150.2
   2.6157    149(17)       0.003398    107.8   150.1
   2.6167    120(15)       0.00427     107.8   150.1
   2.6177    121(15)       0.00419     107.8   150.0
   2.6187    126(16)       0.00398     107.8   150.0
   2.6197    133(16)       0.00378     107.8   150.0
   2.6207    133(16)       0.00389     107.8   149.9
   2.6217    132(16)       0.00387     107.8   149.9
   2.6227    135(16)       0.00375     107.8   149.8
   2.6237    130(16)       0.00392     107.8   149.8
   2.6247    140(17)       0.00364     107.8   149.8
   2.6257    143(17)       0.00357     107.8   149.7
   2.6267    127(16)       0.00397     107.8   149.7
   2.6277    153(17)       0.003281    107.9   149.6
   2.6287    153(17)       0.003289    107.9   149.6
   2.6297    140(17)       0.00360     107.9   149.6
   2.6307    174(19)       0.002900    107.9   149.5
   2.6317    157(18)       0.003233    107.9   149.5
   2.6327    163(18)       0.003086    107.9   149.4
   2.6337    152(17)       0.003338    107.9   149.4
   2.6347    151(17)       0.003337    107.9   149.4
   2.6357    150(17)       0.003338    107.9   149.3
   2.6367    151(17)       0.003350    107.9   149.3
   2.6377    128(16)       0.00399     107.9   149.2
   2.6387    133(16)       0.00385     107.9   149.2
   2.6397    144(17)       0.00354     107.9   149.2
   2.6407    155(18)       0.003264    107.9   149.1
   2.6417    112(15)       0.00454     107.9   149.1
   2.6427    149(17)       0.003411    107.9   149.0
   2.6437    150(17)       0.003376    107.9   149.0
   2.6447    141(17)       0.00363     107.9   148.9
   2.6457    115(15)       0.00442     107.9   148.9
   2.6467    144(17)       0.00354     108.0   148.9
   2.6477    133(16)       0.00381     108.0   148.8
   2.6487    111(15)       0.00459     108.0   148.8
   2.6497    145(17)       0.003484    108.0   148.7
   2.6507    145(17)       0.003495    108.0   148.7
   2.6517    136(16)       0.00373     108.0   148.7
   2.6527    141(17)       0.00359     108.0   148.6
   2.6537    139(17)       0.00364     108.0   148.6
   2.6547    150(17)       0.003386    108.0   148.5
   2.6557    146(17)       0.003458    108.0   148.5
   2.6567    186(19)       0.002731    108.0   148.5
   2.6577    159(18)       0.003201    108.0   148.4
   2.6587    173(18)       0.002972    108.0   148.4
   2.6597    151(17)       0.003344    108.0   148.3
   2.6607    161(18)       0.003160    108.0   148.3
   2.6617    127(16)       0.00397     108.0   148.3
   2.6627    146(17)       0.003458    108.0   148.2
   2.6637    134(16)       0.00375     108.0   148.2
   2.6647    139(17)       0.00364     108.1   148.1
   2.6657    158(18)       0.003183    108.1   148.1
   2.6667    155(17)       0.003302    108.1   148.1
   2.6677    130(16)       0.00388     108.1   148.0
   2.6687    126(16)       0.00405     108.1   148.0
   2.6697    154(17)       0.003273    108.1   147.9
   2.6707    154(17)       0.003267    108.1   147.9
   2.6717    127(16)       0.00397     108.1   147.9
   2.6727    160(18)       0.003178    108.1   147.8
   2.6737    156(18)       0.003241    108.1   147.8
   2.6747    124(16)       0.00414     108.1   147.7
   2.6757    138(17)       0.00366     108.1   147.7
   2.6767    140(17)       0.00362     108.1   147.7
   2.6777    152(17)       0.003334    108.1   147.6
   2.6787    160(18)       0.003178    108.1   147.6
   2.6797    138(16)       0.00368     108.1   147.5
   2.6807    133(16)       0.00386     108.1   147.5
   2.6817    127(16)       0.00399     108.1   147.5
   2.6827    132(16)       0.00386     108.1   147.4
   2.6837    163(18)       0.003096    108.2   147.4
   2.6847    148(17)       0.003425    108.2   147.3
   2.6857    116(15)       0.00441     108.2   147.3
   2.6867    137(16)       0.00373     108.2   147.3
   2.6877    129(16)       0.00390     108.2   147.2
   2.6887    158(18)       0.003198    108.2   147.2
   2.6897    144(17)       0.003496    108.2   147.2
   2.6907    133(16)       0.00384     108.2   147.1
   2.6917    114(15)       0.00442     108.2   147.1
   2.6927    137(17)       0.00366     108.2   147.0
   2.6937    153(17)       0.003301    108.2   147.0
   2.6947    159(18)       0.003175    108.2   147.0
   2.6957    162(18)       0.003136    108.2   146.9
   2.6967    171(18)       0.002956    108.2   146.9
   2.6977    129(16)       0.00394     108.2   146.8
   2.6987    137(16)       0.00369     108.2   146.8
   2.6997    150(17)       0.003365    108.2   146.8
   2.7007    152(17)       0.003309    108.2   146.7
   2.7017    151(17)       0.003340    108.3   146.7
   2.7027    155(18)       0.003249    108.3   146.6
   2.7037    172(18)       0.002955    108.3   146.6
   2.7047    133(16)       0.00383     108.3   146.6
   2.7057    124(16)       0.00410     108.3   146.5
   2.7067    141(17)       0.00361     108.3   146.5
   2.7077    124(16)       0.00409     108.3   146.4
   2.7087    139(17)       0.00366     108.3   146.4
   2.7097    152(17)       0.003346    108.3   146.4
   2.7107    154(17)       0.003307    108.3   146.3
   2.7117    144(17)       0.00353     108.3   146.3
   2.7127    148(17)       0.003416    108.3   146.3
   2.7137    129(16)       0.00389     108.3   146.2
   2.7147    122(16)       0.00414     108.3   146.2
   2.7157    123(16)       0.00416     108.3   146.1
   2.7167    135(16)       0.00380     108.3   146.1
   2.7177    137(16)       0.00368     108.3   146.1
   2.7187    145(17)       0.003480    108.3   146.0
   2.7197    150(17)       0.003342    108.3   146.0
   2.7207    166(18)       0.003040    108.4   145.9
   2.7217    143(17)       0.00355     108.4   145.9
   2.7227    126(16)       0.00405     108.4   145.9
   2.7237    139(17)       0.00362     108.4   145.8
   2.7247    138(17)       0.00366     108.4   145.8
   2.7257    116(15)       0.00438     108.4   145.7
   2.7267    122(16)       0.00414     108.4   145.7
   2.7277    120(15)       0.00425     108.4   145.7
   2.7287    168(18)       0.002998    108.4   145.6
   2.7297    130(16)       0.00392     108.4   145.6
   2.7307    133(16)       0.00386     108.4   145.6
   2.7317    144(17)       0.00355     108.4   145.5
   2.7327    165(18)       0.003040    108.4   145.5
   2.7337    194(20)       0.002589    108.4   145.4
   2.7347    166(18)       0.003028    108.4   145.4
   2.7357    139(17)       0.00363     108.4   145.4
   2.7367    156(18)       0.003249    108.4   145.3
   2.7377    152(17)       0.003375    108.4   145.3
   2.7387    153(17)       0.003318    108.5   145.3
   2.7397    160(18)       0.003179    108.5   145.2
   2.7407    181(19)       0.002790    108.5   145.2
   2.7417    157(18)       0.003232    108.5   145.1
   2.7427    128(16)       0.00399     108.5   145.1
   2.7437    166(18)       0.003047    108.5   145.1
   2.7447    134(16)       0.00380     108.5   145.0
   2.7457    156(18)       0.003250    108.5   145.0
   2.7467    152(17)       0.003347    108.5   145.0
   2.7477    148(17)       0.003439    108.5   144.9
   2.7487    121(15)       0.00422     108.5   144.9
   2.7497    120(15)       0.00423     108.5   144.8
   2.7507    152(17)       0.003315    108.5   144.8
   2.7517    147(17)       0.003452    108.5   146.9
   2.7527    123(16)       0.00414     108.5   147.0
   2.7537    138(16)       0.00369     108.5   147.0
   2.7547    148(17)       0.003455    108.5   147.0
   2.7557    140(17)       0.00364     108.5   147.0
   2.7567    111(15)       0.00453     108.5   147.1
   2.7577    129(16)       0.00391     108.6   147.1
   2.7587    127(16)       0.00399     108.6   147.1
   2.7597    141(17)       0.00362     108.6   147.2
   2.7607    136(16)       0.00377     108.6   147.2
   2.7617    134(16)       0.00379     108.6   147.3
   2.7627    140(17)       0.00362     108.6   147.3
   2.7637    114(15)       0.00444     108.6   147.4
   2.7647    133(16)       0.00384     108.6   147.4
   2.7657    122(15)       0.00418     108.6   147.5
   2.7667    150(17)       0.003369    108.6   147.6
   2.7677    142(17)       0.00357     108.6   147.6
   2.7687    136(16)       0.00371     108.6   147.7
   2.7697    159(18)       0.003166    108.6   147.8
   2.7707    149(17)       0.003394    108.6   147.9
   2.7717    159(18)       0.003199    108.6   148.0
   2.7727    122(16)       0.00415     108.6   148.1
   2.7737    149(17)       0.003377    108.6   148.2
   2.7747    161(18)       0.003158    108.6   148.4
   2.7757    152(17)       0.003330    108.6   148.5
   2.7767    153(17)       0.003330    108.7   148.7
   2.7777    110(15)       0.00460     108.7   148.8
   2.7787    131(16)       0.00386     108.7   149.0
   2.7797    160(18)       0.003163    108.7   149.2
   2.7807    165(18)       0.003071    108.7   149.4
   2.7817    141(17)       0.00359     108.7   149.6
   2.7827    145(17)       0.00351     108.7   149.8
   2.7837    138(16)       0.00369     108.7   150.0
   2.7847    140(17)       0.00361     108.7   150.3
   2.7857    143(17)       0.00355     108.7   150.6
   2.7867    180(19)       0.002803    108.7   150.9
   2.7877    161(18)       0.003137    108.7   151.2
   2.7887    161(18)       0.003164    108.7   151.6
   2.7897    134(16)       0.00381     108.7   152.0
   2.7907    173(18)       0.002932    108.7   152.4
   2.7917    183(19)       0.002770    108.7   152.9
   2.7927    180(19)       0.002809    108.7   153.4
   2.7937    174(18)       0.002930    108.7   154.0
   2.7947    150(17)       0.003459    108.7   154.6
   2.7957    146(17)       0.003445    108.8   155.3
   2.7967    146(17)       0.003465    108.8   156.0
   2.7977    157(18)       0.003226    108.8   156.9
   2.7987    143(17)       0.00353     108.8   157.8
   2.7997    149(17)       0.003412    108.8   158.8
   2.8007    181(19)       0.002806    108.8   159.9
   2.8017    178(19)       0.002826    108.8   161.2
   2.8027    165(18)       0.003068    108.8   162.6
   2.8037    161(18)       0.003147    108.8   164.2
   2.8047    168(18)       0.003036    108.8   166.1
   2.8057    175(19)       0.002911    108.8   168.1
   2.8067    162(18)       0.003131    108.8   170.5
   2.8077    157(18)       0.003241    108.8   173.2
   2.8087    158(18)       0.003254    108.8   176.4
   2.8097    188(19)       0.002709    108.8   180.1
   2.8107    209(20)       0.002435    108.8   184.4
   2.8117    181(19)       0.002798    108.8   189.5
   2.8127    199(20)       0.002566    108.8   195.6
   2.8137    218(21)       0.002337    108.9   203.1
   2.8147    190(19)       0.002680    108.9   212.3
   2.8157    228(21)       0.002216    108.9   224.3
   2.8167    219(21)       0.002315    108.9   240.9
   2.8177    265(23)       0.001918    108.9   266.7
   2.8187    299(24)       0.001684    108.9   310.7
   2.8197    349(26)       0.001446    108.9   390.4
   2.8207    500(31)       0.001021    108.9   534.1
   2.8217    782(39)       0.000649    109.    779.
   2.8227    1115(47)      0.000456    109.    1163.
   2.8237    1624(57)      0.0003125   109.    1702.
   2.8247    2252(67)      0.0002249   109.    2363.
   2.8257    3013(77)      0.0001682   109.    3048.
   2.8267    3756(86)      0.0001344   109.    3591.
   2.8277    4147(91)      0.0001214   109.    3810.
   2.8287    3728(86)      0.0001354   109.    3608.
   2.8297    2985(77)      0.0001698   109.    3064.
   2.8307    2057(63)      0.0002489   109.    2372.
   2.8317    1253(49)      0.000408    109.    1704.
   2.8327    790(39)       0.000646    109.    1160.
   2.8337    466(30)       0.001106    109.0   773.8
   2.8347    365(27)       0.001390    109.0   528.3
   2.8357    333(26)       0.001522    109.0   385.9
   2.8367    289(24)       0.001749    109.0   307.6
   2.8377    257(23)       0.001969    109.0   264.7
   2.8387    236(22)       0.002144    109.0   239.6
   2.8397    221(21)       0.002315    109.0   223.2
   2.8407    176(19)       0.002916    109.0   211.3
   2.8417    206(20)       0.002436    109.0   202.1
   2.8427    209(20)       0.002431    109.0   194.6
   2.8437    174(18)       0.002954    109.0   188.4
   2.8447    145(17)       0.00358     109.0   183.2
   2.8457    174(18)       0.002931    109.0   178.9
   2.8467    173(19)       0.002916    109.0   175.1
   2.8477    179(19)       0.002823    109.0   171.9
   2.8487    161(18)       0.003159    109.0   169.1
   2.8497    151(17)       0.003373    109.0   166.7
   2.8507    142(17)       0.00357     109.0   164.6
   2.8517    167(18)       0.003059    109.1   162.7
   2.8527    181(19)       0.002808    109.1   161.0
   2.8537    178(19)       0.002823    109.1   159.5
   2.8547    173(19)       0.002916    109.1   158.2
   2.8557    157(18)       0.003221    109.1   157.0
   2.8567    143(17)       0.00354     109.1   155.9
   2.8577    144(17)       0.00353     109.1   154.9
   2.8587    146(17)       0.003460    109.1   154.0
   2.8597    136(16)       0.00372     109.1   153.2
   2.8607    149(17)       0.003430    109.1   152.5
   2.8617    151(17)       0.003373    109.1   151.8
   2.8627    153(17)       0.003309    109.1   151.2
   2.8637    149(17)       0.003412    109.1   150.6
   2.8647    168(18)       0.003033    109.1   150.0
   2.8657    167(18)       0.003054    109.1   149.5
   2.8667    157(18)       0.003228    109.1   149.1
   2.8677    151(17)       0.003360    109.1   148.7
   2.8687    132(16)       0.00384     109.1   148.3
   2.8697    163(18)       0.003112    109.1   147.9
   2.8707    160(18)       0.003162    109.2   147.5
   2.8717    173(19)       0.002901    109.2   147.2
   2.8727    154(17)       0.003305    109.2   146.9
   2.8737    140(17)       0.00364     109.2   146.6
   2.8747    160(18)       0.003167    109.2   146.3
   2.8757    160(18)       0.003153    109.2   146.1
   2.8767    138(17)       0.00367     109.2   145.8
   2.8777    139(17)       0.00364     109.2   145.6
   2.8787    141(17)       0.00362     109.2   145.4
   2.8797    155(17)       0.003288    109.2   145.2
   2.8807    152(17)       0.003336    109.2   145.0
   2.8817    142(17)       0.00355     109.2   144.8
   2.8827    145(17)       0.003502    109.2   144.6
   2.8837    153(17)       0.003297    109.2   144.4
   2.8847    175(19)       0.002903    109.2   144.2
   2.8857    159(18)       0.003186    109.2   144.1
   2.8867    145(17)       0.00351     109.2   143.9
   2.8877    146(17)       0.003493    109.2   143.8
   2.8887    167(18)       0.003057    109.2   143.7
   2.8897    168(18)       0.003048    109.3   143.5
   2.8907    168(18)       0.003021    109.3   143.4
   2.8917    147(17)       0.003423    109.3   143.3
   2.8927    145(17)       0.003482    109.3   143.1
   2.8937    150(17)       0.003378    109.3   143.0
   2.8947    146(17)       0.003456    109.3   142.9
   2.8957    153(17)       0.003296    109.3   142.8
   2.8967    134(16)       0.00378     109.3   142.7
   2.8977    161(18)       0.003154    109.3   142.6
   2.8987    157(18)       0.003217    109.3   142.5
   2.8997    163(18)       0.003083    109.3   142.4
   2.9007    155(18)       0.003250    109.3   142.3
   2.9017    137(17)       0.00367     109.3   142.2
   2.9027    148(17)       0.003443    109.3   142.1
   2.9037    172(18)       0.002951    109.3   142.1
   2.9047    155(17)       0.003283    109.3   142.0
   2.9057    164(18)       0.003087    109.3   141.9
   2.9067    155(18)       0.003258    109.3   139.8
   2.9077    143(17)       0.00353     109.3   139.8
   2.9087    158(18)       0.003235    109.4   139.8
   2.9097    153(17)       0.003325    109.4   139.8
   2.9107    143(17)       0.00353     109.4   139.7
   2.9117    150(17)       0.003370    109.4   139.7
   2.9127    166(18)       0.003046    109.4   139.7
   2.9137    160(18)       0.003172    109.4   139.7
   2.9147    143(17)       0.00354     109.4   139.6
   2.9157    151(17)       0.003356    109.4   139.6
   2.9167    153(17)       0.003280    109.4   139.6
   2.9177    138(17)       0.00366     109.4   139.6
   2.9187    138(16)       0.00369     109.4   139.5
   2.9197    145(17)       0.003493    109.4   139.5
   2.9207    143(17)       0.00354     109.4   139.5
   2.9217    130(16)       0.00387     109.4   139.5
   2.9227    118(15)       0.00429     109.4   139.4
   2.9237    135(16)       0.00375     109.4   139.4
   2.9247    143(17)       0.00354     109.4   139.4
   2.9257    123(16)       0.00414     109.4   139.4
   2.9267    156(18)       0.003253    109.4   139.3
   2.9277    155(18)       0.003252    109.5   139.3
   2.9287    165(18)       0.003074    109.5   139.3
   2.9297    163(18)       0.003132    109.5   139.3
   2.9307    136(16)       0.00376     109.5   139.2
   2.9317    157(18)       0.003208    109.5   139.2
   2.9327    121(15)       0.00419     109.5   139.2
   2.9337    120(15)       0.00420     109.5   139.2
   2.9347    137(16)       0.00370     109.5   139.1
   2.9357    138(16)       0.00368     109.5   139.1
   2.9367    143(17)       0.00355     109.5   139.1
   2.9377    114(15)       0.00450     109.5   139.1
   2.9387    139(16)       0.00372     109.5   139.1
   2.9397    135(16)       0.00378     109.5   139.0
   2.9407    155(17)       0.003306    109.5   139.0
   2.9417    149(17)       0.003368    109.5   139.0
   2.9427    148(17)       0.003415    109.5   139.0
   2.9437    137(16)       0.00370     109.5   138.9
   2.9447    127(16)       0.00402     109.5   138.9
   2.9457    138(17)       0.00366     109.5   138.9
   2.9467    133(16)       0.00377     109.6   138.9
   2.9477    141(17)       0.00355     109.6   138.9
   2.9487    149(17)       0.003380    109.6   138.8
   2.9497    138(16)       0.00367     109.6   138.8
   2.9507    120(15)       0.00422     109.6   138.8
   2.9517    124(16)       0.00410     109.6   138.8
   2.9527    132(16)       0.00384     109.6   138.8
   2.9537    133(16)       0.00382     109.6   138.7
   2.9547    141(17)       0.00356     109.6   138.7
   2.9557    150(17)       0.003365    109.6   138.7
   2.9567    164(18)       0.003096    109.6   138.7
   2.9577    158(18)       0.003217    109.6   138.7
   2.9587    133(16)       0.00383     109.6   138.6
   2.9597    145(17)       0.00354     109.6   138.6
   2.9607    162(18)       0.003135    109.6   138.6
   2.9617    164(18)       0.003093    109.6   138.6
   2.9627    150(17)       0.003358    109.6   138.6
   2.9637    131(16)       0.00388     109.6   138.5
   2.9647    127(16)       0.00401     109.6   138.5
   2.9657    135(16)       0.00379     109.7   138.5
   2.9667    149(17)       0.003409    109.7   138.5
   2.9677    158(18)       0.003216    109.7   138.5
   2.9687    157(18)       0.003219    109.7   138.4
   2.9697    152(17)       0.003316    109.7   138.4
   2.9707    159(18)       0.003162    109.7   138.4
   2.9717    174(19)       0.002895    109.7   138.4
   2.9727    149(17)       0.003495    109.7   138.4
   2.9737    119(15)       0.00429     109.7   138.3
   2.9747    153(17)       0.003319    109.7   138.3
   2.9757    156(18)       0.003247    109.7   138.3
   2.9767    133(16)       0.00382     109.7   138.3
   2.9777    166(18)       0.003054    109.7   138.3
   2.9787    163(18)       0.003137    109.7   138.3
   2.9797    155(17)       0.003278    109.7   138.2
   2.9807    164(18)       0.003092    109.7   138.2
   2.9817    137(16)       0.00373     109.7   138.2
   2.9827    153(17)       0.003305    109.7   138.2
   2.9837    136(16)       0.00371     109.7   138.2
   2.9847    144(17)       0.00352     109.8   138.1
   2.9857    169(18)       0.003018    109.8   138.1
   2.9867    154(17)       0.003282    109.8   138.1
   2.9877    156(18)       0.003253    109.8   138.1
   2.9887    192(19)       0.002657    109.8   138.1
   2.9897    146(17)       0.00353     109.8   138.1
   2.9907    132(16)       0.00381     109.8   138.0
   2.9917    138(17)       0.00367     109.8   138.0
   2.9927    133(16)       0.00379     109.8   138.0
   2.9937    135(16)       0.00374     109.8   138.0
   2.9947    129(16)       0.00396     109.8   138.0
   2.9957    143(17)       0.00355     109.8   138.0
   2.9967    152(17)       0.003304    109.8   137.9
   2.9977    117(15)       0.00433     109.8   137.9
   2.9987    144(17)       0.00353     109.8   137.9
   2.9997    157(18)       0.003229    109.8   137.9
   3.0007    135(16)       0.00378     109.8   137.9
   3.0017    144(17)       0.003485    109.8   137.9
   3.0027    143(17)       0.00355     109.8   137.9
   3.0037    142(17)       0.00356     109.9   137.8
   3.0047    129(16)       0.00393     109.9   137.8
   3.0057    146(17)       0.003446    109.9   137.8
   3.0067    145(17)       0.003491    109.9   137.8
   3.0077    125(16)       0.00400     109.9   137.8
   3.0087    167(18)       0.003035    109.9   137.8
   3.0097    139(17)       0.00366     109.9   137.7
   3.0107    131(16)       0.00390     109.9   137.7
   3.0117    151(17)       0.003354    109.9   137.7
   3.0127    140(17)       0.00360     109.9   137.7
   3.0137    148(17)       0.003436    109.9   137.7
   3.0147    165(18)       0.003078    109.9   137.7
   3.0157    139(17)       0.00364     109.9   137.7
   3.0167    134(16)       0.00375     109.9   137.7
   3.0177    131(16)       0.00386     109.9   137.6
   3.0187    145(17)       0.003462    109.9   137.6
   3.0197    169(18)       0.002973    109.9   137.6
   3.0207    151(17)       0.003322    109.9   137.6
   3.0217    129(16)       0.00394     109.9   137.6
   3.0227    141(17)       0.00358     110.0   137.6
   3.0237    145(17)       0.003453    110.0   137.6
   3.0247    138(17)       0.00364     110.0   137.5
   3.0257    131(16)       0.00382     110.0   137.5
   3.0267    139(17)       0.00362     110.0   137.5
   3.0277    139(17)       0.00363     110.0   137.5
   3.0287    130(16)       0.00391     110.0   137.5
   3.0297    133(16)       0.00381     110.0   137.5
   3.0307    144(17)       0.00355     110.0   137.5
   3.0317    162(18)       0.003149    110.0   137.5
   3.0327    144(17)       0.00351     110.0   137.4
   3.0337    139(17)       0.00365     110.0   137.4
   3.0347    143(17)       0.00351     110.0   137.4
   3.0357    147(17)       0.003453    110.0   137.4
   3.0367    137(17)       0.00366     110.0   137.4
   3.0377    121(16)       0.00414     110.0   137.4
   3.0387    136(16)       0.00367     110.0   137.4
   3.0397    149(17)       0.003359    110.0   137.4
   3.0407    159(18)       0.003147    110.0   137.4
   3.0417    147(17)       0.003430    110.1   137.4
   3.0427    143(17)       0.00353     110.1   137.3
   3.0437    167(18)       0.003021    110.1   137.3
   3.0447    133(16)       0.00378     110.1   137.3
   3.0457    139(17)       0.00365     110.1   137.3
   3.0467    166(18)       0.003028    110.1   137.3
   3.0477    138(17)       0.00367     110.1   137.3
   3.0487    131(16)       0.00385     110.1   137.3
   3.0497    133(16)       0.00381     110.1   137.3
   3.0507    148(17)       0.003410    110.1   137.3
   3.0517    132(16)       0.00380     110.1   137.3
   3.0527    133(16)       0.00382     110.1   137.2
   3.0537    146(17)       0.003481    110.1   137.2
   3.0547    150(17)       0.003359    110.1   137.2
   3.0557    153(17)       0.003292    110.1   137.2
   3.0567    155(18)       0.003247    110.1   137.2
   3.0577    146(17)       0.003467    110.1   137.2
   3.0587    156(18)       0.003243    110.1   137.2
   3.0597    128(16)       0.00397     110.1   137.2
   3.0607    160(18)       0.003176    110.2   137.2
   3.0617    163(18)       0.003092    110.2   137.2
   3.0627    127(16)       0.00403     110.2   137.2
   3.0637    135(16)       0.00380     110.2   137.1
   3.0647    167(18)       0.003027    110.2   137.1
   3.0657    150(17)       0.003338    110.2   137.1
   3.0667    148(17)       0.003442    110.2   137.1
   3.0677    151(17)       0.003349    110.2   137.1
   3.0687    145(17)       0.003507    110.2   137.1
   3.0697    151(17)       0.003353    110.2   137.1
   3.0707    165(18)       0.003060    110.2   137.1
   3.0717    143(17)       0.00354     110.2   137.1
   3.0727    156(18)       0.003252    110.2   137.1
   3.0737    164(18)       0.003098    110.2   137.1
   3.0747    146(17)       0.003493    110.2   137.1
   3.0757    132(16)       0.00384     110.2   137.1
   3.0767    142(17)       0.00363     110.2   137.1
   3.0777    129(16)       0.00395     110.2   137.1
   3.0787    111(15)       0.00458     110.2   137.0
   3.0797    144(17)       0.00357     110.2   137.0
   3.0807    149(17)       0.003419    110.3   137.0
   3.0817    155(18)       0.003262    110.3   137.0
   3.0827    129(16)       0.00394     110.3   137.0
   3.0837    139(17)       0.00363     110.3   137.0
   3.0847    143(17)       0.00353     110.3   137.0
   3.0857    140(17)       0.00364     110.3   137.0
   3.0867    147(17)       0.003434    110.3   137.0
   3.0877    147(17)       0.003434    110.3   137.0
   3.0887    140(17)       0.00362     110.3   137.0
   3.0897    144(17)       0.00353     110.3   137.0
   3.0907    162(18)       0.003116    110.3   137.0
   3.0917    130(16)       0.00390     110.3   137.0
   3.0927    168(18)       0.002989    110.3   137.0
   3.0937    152(17)       0.003340    110.3   137.0
   3.0947    146(17)       0.003465    110.3   137.0
   3.0957    139(16)       0.00371     110.3   137.0
   3.0967    152(17)       0.003316    110.3   137.0
   3.0977    145(17)       0.003472    110.3   137.0
   3.0987    158(18)       0.003202    110.3   137.0
   3.0997    175(19)       0.002881    110.4   137.0
   3.1007    161(18)       0.003119    110.4   137.0
   3.1017    148(17)       0.003388    110.4   137.0
   3.1027    175(19)       0.002887    110.4   136.9
   3.1037    162(18)       0.003102    110.4   136.9
   3.1047    150(17)       0.003360    110.4   136.9
   3.1057    141(17)       0.00357     110.4   136.9
   3.1067    169(18)       0.003040    110.4   136.9
   3.1077    194(20)       0.002599    110.4   136.9
   3.1087    138(16)       0.00371     110.4   136.9
   3.1097    153(17)       0.003311    110.4   136.9
   3.1107    137(17)       0.00367     110.4   136.9
   3.1117    127(16)       0.00396     110.4   136.9
   3.1127    142(17)       0.00355     110.4   136.9
   3.1137    186(19)       0.002727    110.4   136.9
   3.1147    166(18)       0.003069    110.4   136.9
   3.1157    147(17)       0.003428    110.4   136.9
   3.1167    164(18)       0.003071    110.4   136.9
   3.1177    149(17)       0.003407    110.4   136.9
   3.1187    140(17)       0.00360     110.5   136.9
   3.1197    145(17)       0.003496    110.5   136.9
   3.1207    144(17)       0.00352     110.5   136.9
   3.1217    165(18)       0.003109    110.5   136.9
   3.1227    151(17)       0.003354    110.5   136.9
   3.1237    189(19)       0.002675    110.5   136.9
   3.1247    180(19)       0.002803    110.5   136.9
   3.1257    157(18)       0.003208    110.5   136.9
   3.1267    173(19)       0.002911    110.5   136.9
   3.1277    189(19)       0.002660    110.5   136.9
   3.1287    151(17)       0.003333    110.5   136.9
   3.1297    143(17)       0.00357     110.5   136.9
   3.1307    141(17)       0.00361     110.5   136.9
   3.1317    128(16)       0.00397     110.5   136.9
   3.1327    163(18)       0.003111    110.5   136.9
   3.1337    163(18)       0.003108    110.5   136.9
   3.1347    158(18)       0.003201    110.5   136.9
   3.1357    162(18)       0.003129    110.5   136.9
   3.1367    143(17)       0.00357     110.5   136.9
   3.1377    152(17)       0.003360    110.6   136.9
   3.1387    162(18)       0.003148    110.6   136.9
   3.1397    160(18)       0.003180    110.6   136.9
   3.1407    142(17)       0.00356     110.6   136.9
   3.1417    158(18)       0.003198    110.6   136.9
   3.1427    165(18)       0.003061    110.6   137.0
   3.1437    171(18)       0.002967    110.6   137.0
   3.1447    137(16)       0.00374     110.6   137.0
   3.1457    116(15)       0.00437     110.6   137.0
   3.1467    147(17)       0.003454    110.6   137.0
   3.1477    152(17)       0.003314    110.6   137.0
   3.1487    162(18)       0.003111    110.6   137.0
   3.1497    157(18)       0.003204    110.6   137.0
   3.1507    161(18)       0.003141    110.6   137.0
   3.1517    166(18)       0.003035    110.6   137.0
   3.1527    162(18)       0.003123    110.6   137.0
   3.1537    165(18)       0.003088    110.6   137.0
   3.1547    161(18)       0.003164    110.6   137.0
   3.1557    138(16)       0.00370     110.6   137.0
   3.1567    171(18)       0.002956    110.6   137.0
   3.1577    167(18)       0.003023    110.7   137.0
   3.1587    125(16)       0.00402     110.7   137.0
   3.1597    123(16)       0.00413     110.7   137.0
   3.1607    155(17)       0.003299    110.7   137.0
   3.1617    158(18)       0.003195    110.7   137.0
   3.1627    167(18)       0.003038    110.7   137.0
   3.1637    149(17)       0.003392    110.7   137.0
   3.1647    156(18)       0.003260    110.7   137.0
   3.1657    175(19)       0.002906    110.7   137.1
   3.1667    152(17)       0.003340    110.7   137.1
   3.1677    143(17)       0.00353     110.7   137.1
   3.1687    161(18)       0.003144    110.7   137.1
   3.1697    166(18)       0.003050    110.7   137.1
   3.1707    131(16)       0.00388     110.7   137.1
   3.1717    127(16)       0.00404     110.7   137.1
   3.1727    146(17)       0.003465    110.7   137.1
   3.1737    143(17)       0.00352     110.7   137.1
   3.1747    148(17)       0.003437    110.7   137.1
   3.1757    133(16)       0.00381     110.7   137.1
   3.1767    131(16)       0.00390     110.8   137.1
   3.1777    158(18)       0.003221    110.8   137.1
   3.1787    175(19)       0.002896    110.8   137.1
   3.1797    135(16)       0.00377     110.8   137.2
   3.1807    157(18)       0.003223    110.8   137.2
   3.1817    114(15)       0.00445     110.8   137.2
   3.1827    160(18)       0.003145    110.8   137.2
   3.1837    177(19)       0.002842    110.8   137.2
   3.1847    159(18)       0.003194    110.8   137.2
   3.1857    149(17)       0.003402    110.8   137.2
   3.1867    156(18)       0.003213    110.8   137.2
   3.1877    156(18)       0.003211    110.8   137.2
   3.1887    147(17)       0.003456    110.8   137.2
   3.1897    178(19)       0.002849    110.8   137.2
   3.1907    160(18)       0.003193    110.8   137.2
   3.1917    157(18)       0.003222    110.8   137.3
   3.1927    157(18)       0.003221    110.8   137.3
   3.1937    138(16)       0.00368     110.8   137.3
   3.1947    125(16)       0.00406     110.8   137.3
   3.1957    131(16)       0.00385     110.8   137.3
   3.1967    133(16)       0.00381     110.9   137.3
   3.1977    143(17)       0.00354     110.9   137.3
   3.1987    168(18)       0.003007    110.9   137.3
   3.1997    146(17)       0.003489    110.9   137.3
   3.2007    164(18)       0.003095    110.9   137.4
   3.2017    167(18)       0.003065    110.9   137.4
   3.2027    140(17)       0.00363     110.9   137.4
   3.2037    131(16)       0.00388     110.9   137.4
   3.2047    168(18)       0.003008    110.9   137.4
   3.2057    148(17)       0.003422    110.9   137.4
   3.2067    149(17)       0.003415    110.9   137.4
   3.2077    142(17)       0.00355     110.9   137.4
   3.2087    149(17)       0.003393    110.9   137.4
   3.2097    157(18)       0.003235    110.9   137.5
   3.2107    168(18)       0.003030    110.9   137.5
   3.2117    136(16)       0.00373     110.9   137.5
   3.2127    152(17)       0.003332    110.9   137.5
   3.2137    162(18)       0.003124    110.9   137.5
   3.2147    133(16)       0.00385     110.9   137.5
   3.2157    133(16)       0.00382     111.0   137.5
   3.2167    125(16)       0.00405     111.0   137.5
   3.2177    137(16)       0.00375     111.0   137.6
   3.2187    167(18)       0.003037    111.0   137.6
   3.2197    149(17)       0.003417    111.0   137.6
   3.2207    119(15)       0.00432     111.0   137.6
   3.2217    138(16)       0.00371     111.0   137.6
   3.2227    140(17)       0.00365     111.0   137.6
   3.2237    147(17)       0.003442    111.0   137.6
   3.2247    144(17)       0.00353     111.0   137.7
   3.2257    154(17)       0.003287    111.0   137.7
   3.2267    157(18)       0.003233    111.0   137.7
   3.2277    151(17)       0.003364    111.0   137.7
   3.2287    157(18)       0.003224    111.0   137.7
   3.2297    145(17)       0.003490    111.0   137.7
   3.2307    165(18)       0.003102    111.0   137.7
   3.2317    141(17)       0.00361     111.0   137.8
   3.2327    136(16)       0.00374     111.0   137.8
   3.2337    174(19)       0.002891    111.0   137.8
   3.2347    156(18)       0.003243    111.0   137.8
   3.2357    150(17)       0.003358    111.1   137.8
   3.2367    167(18)       0.003038    111.1   137.8
   3.2377    172(18)       0.002954    111.1   137.9
   3.2387    162(18)       0.003137    111.1   137.9
   3.2397    155(17)       0.003283    111.1   137.9
   3.2407    147(17)       0.003459    111.1   137.9
   3.2417    144(17)       0.00352     111.1   137.9
   3.2427    165(18)       0.003018    111.1   137.9
   3.2437    134(16)       0.00378     111.1   138.0
   3.2447    143(17)       0.00354     111.1   138.0
   3.2457    136(16)       0.00373     111.1   138.0
   3.2467    157(18)       0.003247    111.1   138.0
   3.2477    164(18)       0.003092    111.1   138.0
   3.2487    153(17)       0.003327    111.1   138.0
   3.2497    142(17)       0.00359     111.1   138.1
   3.2507    139(17)       0.00366     111.1   138.1
   3.2517    145(17)       0.003486    111.1   138.1
   3.2527    152(17)       0.003333    111.1   142.2
   3.2537    155(17)       0.003287    111.1   142.3
   3.2547    146(17)       0.003486    111.2   142.4
   3.2557    150(17)       0.003402    111.2   142.6
   3.2567    141(17)       0.00358     111.2   142.7
   3.2577    144(17)       0.003503    111.2   142.8
   3.2587    149(17)       0.003376    111.2   143.0
   3.2597    162(18)       0.003156    111.2   143.2
   3.2607    165(18)       0.003072    111.2   143.3
   3.2617    147(17)       0.003470    111.2   143.5
   3.2627    143(17)       0.00354     111.2   143.7
   3.2637    148(17)       0.003441    111.2   143.9
   3.2647    153(17)       0.003311    111.2   144.1
   3.2657    154(17)       0.003306    111.2   144.3
   3.2667    140(17)       0.00365     111.2   144.5
   3.2677    130(16)       0.00390     111.2   144.7
   3.2687    165(18)       0.003100    111.2   144.9
   3.2697    164(18)       0.003076    111.2   145.2
   3.2707    159(18)       0.003172    111.2   145.5
   3.2717    170(18)       0.002950    111.2   145.7
   3.2727    176(19)       0.002887    111.2   146.0
   3.2737    150(17)       0.003398    111.2   146.3
   3.2747    173(18)       0.002941    111.3   146.6
   3.2757    151(17)       0.003363    111.3   147.0
   3.2767    175(19)       0.002916    111.3   147.3
   3.2777    171(18)       0.002949    111.3   147.7
   3.2787    159(18)       0.003216    111.3   148.1
   3.2797    162(18)       0.003139    111.3   148.5
   3.2807    165(18)       0.003059    111.3   148.9
   3.2817    155(18)       0.003254    111.3   149.4
   3.2827    176(19)       0.002895    111.3   149.9
   3.2837    163(18)       0.003121    111.3   150.5
   3.2847    163(18)       0.003092    111.3   151.0
   3.2857    168(18)       0.003003    111.3   151.6
   3.2867    197(20)       0.002561    111.3   152.3
   3.2877    180(19)       0.002842    111.3   153.0
   3.2887    164(18)       0.003112    111.3   153.7
   3.2897    167(18)       0.003037    111.3   154.6
   3.2907    155(18)       0.003253    111.3   155.4
   3.2917    170(18)       0.002959    111.3   156.4
   3.2927    150(17)       0.003409    111.3   157.4
   3.2937    149(17)       0.003409    111.4   158.5
   3.2947    169(18)       0.003008    111.4   159.7
   3.2957    184(19)       0.002766    111.4   161.1
   3.2967    177(19)       0.002870    111.4   162.5
   3.2977    163(18)       0.003102    111.4   164.1
   3.2987    147(17)       0.003424    111.4   165.9
   3.2997    168(18)       0.003014    111.4   167.8
   3.3007    199(20)       0.002549    111.4   170.0
   3.3017    177(19)       0.002870    111.4   172.4
   3.3027    161(18)       0.003140    111.4   175.1
   3.3037    192(19)       0.002630    111.4   178.1
   3.3047    201(20)       0.002504    111.4   181.5
   3.3057    187(19)       0.002682    111.4   185.4
   3.3067    211(20)       0.002386    111.4   189.8
   3.3077    201(20)       0.002531    111.4   194.9
   3.3087    203(20)       0.002502    111.4   200.7
   3.3097    237(22)       0.002137    111.4   207.6
   3.3107    221(21)       0.002296    111.4   215.5
   3.3117    244(22)       0.002058    111.4   225.0
   3.3127    256(22)       0.001979    111.4   236.3
   3.3137    282(24)       0.001797    111.5   250.0
   3.3147    274(23)       0.001851    111.5   266.9
   3.3157    296(24)       0.001719    111.5   288.8
   3.3167    336(26)       0.001506    111.5   319.2
   3.3177    368(27)       0.001372    111.5   366.1
   3.3187    441(29)       0.001156    111.5   446.1
   3.3197    564(33)       0.000907    111.5   591.8
   3.3207    758(39)       0.000672    111.    856.
   3.3217    1148(47)      0.000446    111.    1308.
   3.3227    1774(59)      0.0002870   111.    2017.
   3.3237    2629(72)      0.0001935   112.    3014.
   3.3247    4069(89)      0.0001252   112.    4235.
   3.3257    5850(110)     0.0000868   112.    5494.
   3.3267    7270(120)     0.0000694   112.    6476.
   3.3277    7950(130)     0.0000634   112.    6838.
   3.3287    7570(120)     0.0000667   112.    6417.
   3.3297    6030(110)     0.0000844   112.    5387.
   3.3307    3890(87)      0.0001325   112.    4111.
   3.3317    2226(66)      0.0002310   112.    2899.
   3.3327    1394(52)      0.000367    112.    1927.
   3.3337    993(44)       0.000512    112.    1244.
   3.3347    687(37)       0.000744    112.    815.
   3.3357    525(32)       0.000962    111.6   568.3
   3.3367    446(30)       0.001136    111.6   433.4
   3.3377    364(27)       0.001391    111.6   359.2
   3.3387    345(26)       0.001469    111.6   315.4
   3.3397    302(24)       0.001680    111.6   286.6
   3.3407    265(23)       0.001912    111.6   265.6
   3.3417    246(22)       0.002056    111.6   249.1
   3.3427    222(21)       0.002285    111.6   235.8
   3.3437    210(20)       0.002427    111.6   224.8
   3.3447    217(21)       0.002337    111.6   215.6
   3.3457    218(21)       0.002314    111.6   207.8
   3.3467    203(20)       0.002507    111.6   201.2
   3.3477    208(20)       0.002437    111.6   195.5
   3.3487    205(20)       0.002461    111.6   190.5
   3.3497    213(20)       0.002384    111.6   186.2
   3.3507    205(20)       0.002475    111.6   182.5
   3.3517    185(19)       0.002737    111.6   179.2
   3.3527    185(19)       0.002743    111.7   176.2
   3.3537    182(19)       0.002781    111.7   173.6
   3.3547    182(19)       0.002799    111.7   171.3
   3.3557    180(19)       0.002811    111.7   169.2
   3.3567    179(19)       0.002829    111.7   167.4
   3.3577    168(18)       0.003050    111.7   165.7
   3.3587    197(20)       0.002551    111.7   164.2
   3.3597    158(18)       0.003247    111.7   162.8
   3.3607    167(18)       0.003041    111.7   161.5
   3.3617    168(18)       0.003019    111.7   160.4
   3.3627    170(18)       0.002982    111.7   159.3
   3.3637    184(19)       0.002739    111.7   158.4
   3.3647    178(19)       0.002863    111.7   157.5
   3.3657    152(17)       0.003369    111.7   156.7
   3.3667    176(19)       0.002875    111.7   155.9
   3.3677    162(18)       0.003140    111.7   155.3
   3.3687    148(17)       0.003450    111.7   154.6
   3.3697    158(18)       0.003229    111.7   154.0
   3.3707    172(18)       0.002960    111.7   153.5
   3.3717    146(17)       0.00353     111.7   153.0
   3.3727    150(17)       0.003357    111.8   152.5
   3.3737    163(18)       0.003139    111.8   152.1
   3.3747    166(18)       0.003083    111.8   151.7
   3.3757    134(16)       0.00378     111.8   151.3
   3.3767    160(18)       0.003203    111.8   150.9
   3.3777    185(19)       0.002739    111.8   150.6
   3.3787    167(18)       0.003042    111.8   150.3
   3.3797    142(17)       0.00356     111.8   150.0
   3.3807    158(18)       0.003204    111.8   149.7
   3.3817    171(18)       0.002961    111.8   149.4
   3.3827    179(19)       0.002805    111.8   149.2
   3.3837    170(18)       0.002975    111.8   149.0
   3.3847    161(18)       0.003205    111.8   148.8
   3.3857    153(17)       0.003319    111.8   148.6
   3.3867    161(18)       0.003135    111.8   148.4
   3.3877    164(18)       0.003076    111.8   148.2
   3.3887    167(18)       0.003052    111.8   148.0
   3.3897    179(19)       0.002856    111.8   147.9
   3.3907    162(18)       0.003147    111.8   147.7
   3.3917    153(17)       0.003330    111.8   147.6
   3.3927    147(17)       0.003452    111.9   147.5
   3.3937    157(18)       0.003248    111.9   147.3
   3.3947    171(18)       0.002961    111.9   147.2
   3.3957    157(18)       0.003231    111.9   147.1
   3.3967    169(18)       0.003009    111.9   147.0
   3.3977    154(17)       0.003304    111.9   146.9
   3.3987    145(17)       0.00352     111.9   146.8
   3.3997    139(16)       0.00368     111.9   146.8
   3.4007    147(17)       0.003467    111.9   146.7
   3.4017    160(18)       0.003163    111.9   146.6
   3.4027    163(18)       0.003091    111.9   146.5
   3.4037    164(18)       0.003065    111.9   146.5
   3.4047    144(17)       0.00355     111.9   146.4
   3.4057    159(18)       0.003192    111.9   146.3
   3.4067    168(18)       0.003016    111.9   146.3
   3.4077    168(18)       0.003016    111.9   142.7
   3.4087    151(17)       0.003394    111.9   142.7
   3.4097    158(18)       0.003209    111.9   142.8
   3.4107    155(18)       0.003265    111.9   142.8
   3.4117    157(18)       0.003205    111.9   142.9
   3.4127    157(18)       0.003214    112.0   142.9
   3.4137    159(18)       0.003161    112.0   143.0
   3.4147    158(18)       0.003204    112.0   143.0
   3.4157    168(18)       0.003040    112.0   143.0
   3.4167    138(16)       0.00372     112.0   143.1
   3.4177    123(16)       0.00413     112.0   143.1
   3.4187    160(18)       0.003178    112.0   143.2
   3.4197    166(18)       0.003060    112.0   143.2
   3.4207    142(17)       0.00358     112.0   143.2
   3.4217    163(18)       0.003121    112.0   143.3
   3.4227    159(18)       0.003213    112.0   143.3
   3.4237    166(18)       0.003051    112.0   143.4
   3.4247    162(18)       0.003145    112.0   143.4
   3.4257    125(16)       0.00403     112.0   143.5
   3.4267    147(17)       0.003434    112.0   143.5
   3.4277    160(18)       0.003172    112.0   143.5
   3.4287    155(17)       0.003275    112.0   143.6
   3.4297    145(17)       0.00351     112.0   143.6
   3.4307    159(18)       0.003218    112.0   143.7
   3.4317    170(18)       0.002990    112.1   143.7
   3.4327    156(18)       0.003233    112.1   143.8
   3.4337    147(17)       0.003439    112.1   143.8
   3.4347    156(18)       0.003254    112.1   143.9
   3.4357    140(17)       0.00362     112.1   143.9
   3.4367    135(16)       0.00376     112.1   143.9
   3.4377    169(18)       0.002977    112.1   144.0
   3.4386    169(18)       0.002987    112.1   144.0
   3.4397    167(18)       0.003031    112.1   144.1
   3.4406    162(18)       0.003122    112.1   144.1
   3.4416    157(18)       0.003203    112.1   144.2
   3.4426    166(18)       0.003045    112.1   144.2
   3.4436    180(19)       0.002798    112.1   144.3
   3.4446    165(18)       0.003053    112.1   144.3
   3.4456    171(18)       0.002959    112.1   144.4
   3.4466    149(17)       0.003413    112.1   144.4
   3.4476    166(18)       0.003036    112.1   144.4
   3.4486    139(17)       0.00365     112.1   144.5
   3.4496    146(17)       0.003486    112.1   144.5
   3.4506    145(17)       0.003487    112.1   144.6
   3.4516    168(18)       0.003003    112.2   144.6
   3.4526    175(19)       0.002885    112.2   144.7
   3.4536    151(17)       0.003362    112.2   144.7
   3.4546    121(15)       0.00422     112.2   144.8
   3.4556    150(17)       0.003396    112.2   144.8
   3.4566    161(18)       0.003139    112.2   144.9
   3.4576    136(16)       0.00377     112.2   144.9
   3.4586    118(15)       0.00431     112.2   145.0
   3.4596    155(18)       0.003240    112.2   145.0
   3.4606    152(17)       0.003329    112.2   145.1
   3.4616    151(17)       0.003359    112.2   145.1
   3.4626    166(18)       0.003039    112.2   145.2
   3.4636    141(17)       0.00361     112.2   145.2
   3.4646    152(17)       0.003327    112.2   145.2
   3.4656    172(18)       0.002957    112.2   145.3
   3.4666    167(18)       0.003038    112.2   145.3
   3.4676    150(17)       0.003382    112.2   145.4
   3.4686    177(19)       0.002847    112.2   145.4
   3.4696    170(18)       0.002981    112.2   145.5
   3.4706    170(18)       0.002977    112.2   145.5
   3.4716    146(17)       0.003493    112.3   145.6
   3.4726    173(18)       0.002943    112.3   145.6
   3.4736    163(18)       0.003130    112.3   145.7
   3.4746    160(18)       0.003188    112.3   145.7
   3.4756    148(17)       0.003432    112.3   145.8
   3.4766    135(16)       0.00384     112.3   145.8
   3.4776    155(18)       0.003230    112.3   145.9
   3.4786    157(18)       0.003234    112.3   145.9
   3.4796    161(18)       0.003162    112.3   146.0
   3.4806    162(18)       0.003151    112.3   146.0
   3.4816    157(18)       0.003235    112.3   146.1
   3.4826    146(17)       0.003457    112.3   146.1
   3.4836    134(16)       0.00379     112.3   146.2
   3.4846    150(17)       0.003374    112.3   146.2
   3.4856    154(17)       0.003312    112.3   146.3
   3.4866    155(17)       0.003268    112.3   146.3
   3.4876    162(18)       0.003146    112.3   146.4
   3.4886    168(18)       0.003059    112.3   146.4
   3.4896    164(18)       0.003092    112.3   146.5
   3.4906    144(17)       0.003507    112.3   146.6
   3.4916    143(17)       0.00353     112.4   146.6
   3.4926    161(18)       0.003147    112.4   146.7
   3.4936    161(18)       0.003127    112.4   146.7
   3.4946    136(16)       0.00375     112.4   146.8
   3.4956    172(18)       0.002948    112.4   146.8
   3.4966    175(19)       0.002890    112.4   146.9
   3.4976    144(17)       0.00354     112.4   146.9
   3.4986    145(17)       0.00356     112.4   147.0
   3.4996    175(19)       0.002880    112.4   147.0
   3.5006    164(18)       0.003083    112.4   147.1
   3.5016    131(16)       0.00385     112.4   147.1
   3.5026    133(16)       0.00380     112.4   147.2
   3.5036    145(17)       0.00352     112.4   147.2
   3.5046    118(15)       0.00429     112.4   147.3
   3.5056    134(16)       0.00380     112.4   147.3
   3.5066    155(17)       0.003312    112.4   147.4
   3.5076    153(17)       0.003269    112.4   147.5
   3.5086    153(17)       0.003293    112.4   147.5
   3.5096    142(17)       0.00357     112.4   147.6
   3.5106    139(17)       0.00364     112.4   147.6
   3.5116    148(17)       0.003450    112.5   147.7
   3.5126    154(17)       0.003296    112.5   147.7
   3.5136    138(16)       0.00368     112.5   147.8
   3.5146    174(19)       0.002912    112.5   147.8
   3.5156    174(19)       0.002891    112.5   147.9
   3.5166    190(19)       0.002650    112.5   147.9
   3.5176    151(17)       0.003375    112.5   148.0
   3.5186    137(16)       0.00370     112.5   148.1
   3.5196    147(17)       0.003439    112.5   148.1
   3.5206    137(16)       0.00369     112.5   148.2
   3.5216    144(17)       0.003506    112.5   148.2
   3.5226    160(18)       0.003170    112.5   148.3
   3.5236    147(17)       0.003507    112.5   148.3
   3.5246    134(16)       0.00379     112.5   148.4
   3.5256    159(18)       0.003188    112.5   148.4
   3.5266    159(18)       0.003202    112.5   148.5
   3.5276    153(17)       0.003295    112.5   148.6
   3.5286    139(17)       0.00363     112.5   148.6
   3.5296    124(16)       0.00411     112.5   148.7
   3.5306    141(17)       0.00360     112.5   148.7
   3.5316    159(18)       0.003227    112.6   148.8
   3.5326    141(17)       0.00364     112.6   148.8
   3.5336    159(18)       0.003195    112.6   148.9
   3.5346    162(18)       0.003129    112.6   149.0
   3.5356    160(18)       0.003175    112.6   149.0
   3.5366    147(17)       0.003467    112.6   149.1
   3.5376    139(17)       0.00366     112.6   149.1
   3.5386    158(18)       0.003187    112.6   149.2
   3.5396    148(17)       0.003403    112.6   149.2
   3.5406    157(18)       0.003223    112.6   149.3
   3.5416    152(17)       0.003367    112.6   149.4
   3.5426    177(19)       0.002861    112.6   149.4
   3.5436    153(17)       0.003277    112.6   149.5
   3.5446    166(18)       0.003044    112.6   149.5
   3.5456    169(18)       0.003020    112.6   149.6
   3.5466    143(17)       0.00355     112.6   149.7
   3.5476    166(18)       0.003043    112.6   149.7
   3.5486    155(18)       0.003252    112.6   149.8
   3.5496    147(17)       0.003438    112.6   149.8
   3.5506    162(18)       0.003114    112.6   149.9
   3.5516    182(19)       0.002760    112.7   150.0
   3.5526    178(19)       0.002836    112.7   150.0
   3.5536    160(18)       0.003166    112.7   150.1
   3.5546    156(18)       0.003256    112.7   150.1
   3.5556    169(18)       0.003011    112.7   150.2
   3.5566    168(18)       0.002998    112.7   150.2
   3.5576    175(19)       0.002860    112.7   150.3
   3.5586    160(18)       0.003162    112.7   150.4
   3.5596    140(17)       0.00361     112.7   150.4
   3.5606    143(17)       0.00358     112.7   150.5
   3.5616    161(18)       0.003170    112.7   150.6
   3.5626    127(16)       0.00397     112.7   150.6
   3.5636    136(16)       0.00375     112.7   150.7
   3.5646    174(18)       0.002933    112.7   150.7
   3.5656    171(18)       0.002950    112.7   150.8
   3.5666    166(18)       0.003077    112.7   150.9
   3.5676    182(19)       0.002814    112.7   151.7
   3.5686    147(17)       0.003435    112.7   151.8
   3.5696    165(18)       0.003066    112.7   151.9
   3.5706    161(18)       0.003144    112.7   152.0
   3.5716    177(19)       0.002865    112.7   152.1
   3.5726    148(17)       0.003407    112.8   152.2
   3.5736    161(18)       0.003123    112.8   152.3
   3.5746    166(18)       0.003043    112.8   152.3
   3.5756    155(17)       0.003330    112.8   152.4
   3.5766    180(19)       0.002826    112.8   152.5
   3.5776    148(17)       0.003415    112.8   152.6
   3.5786    149(17)       0.003400    112.8   152.7
   3.5796    143(17)       0.00357     112.8   152.8
   3.5806    156(17)       0.003291    112.8   152.9
   3.5816    144(17)       0.00354     112.8   153.0
   3.5826    160(18)       0.003147    112.8   153.1
   3.5836    147(17)       0.003445    112.8   153.2
   3.5846    171(18)       0.002925    112.8   153.4
   3.5856    151(17)       0.003364    112.8   153.5
   3.5866    160(18)       0.003152    112.8   153.6
   3.5876    145(17)       0.003478    112.8   153.7
   3.5886    175(19)       0.002884    112.8   153.8
   3.5896    171(18)       0.002984    112.8   153.9
   3.5906    197(20)       0.002560    112.8   154.1
   3.5916    194(20)       0.002622    112.8   154.2
   3.5926    144(17)       0.00354     112.9   154.3
   3.5936    145(17)       0.00351     112.9   154.5
   3.5946    151(17)       0.003394    112.9   154.6
   3.5956    162(18)       0.003128    112.9   154.8
   3.5966    141(17)       0.00359     112.9   154.9
   3.5976    150(17)       0.003384    112.9   155.1
   3.5986    143(17)       0.00353     112.9   155.3
   3.5996    149(17)       0.003459    112.9   155.4
   3.6006    143(17)       0.00365     112.9   155.6
   3.6016    132(16)       0.00383     112.9   155.8
   3.6026    150(17)       0.003402    112.9   156.0
   3.6036    164(18)       0.003104    112.9   156.2
   3.6046    132(16)       0.00387     112.9   156.5
   3.6056    152(17)       0.003352    112.9   156.7
   3.6066    163(18)       0.003145    112.9   157.0
   3.6076    178(19)       0.002852    112.9   157.3
   3.6086    166(18)       0.003058    112.9   157.5
   3.6096    165(18)       0.003045    112.9   157.9
   3.6106    152(17)       0.003342    112.9   158.2
   3.6116    160(18)       0.003199    112.9   158.6
   3.6126    168(18)       0.002989    113.0   159.0
   3.6136    170(18)       0.002970    113.0   159.4
   3.6146    163(18)       0.003131    113.0   159.9
   3.6156    150(17)       0.003386    113.0   160.4
   3.6166    148(17)       0.003433    113.0   160.9
   3.6176    182(19)       0.002798    113.0   161.6
   3.6186    186(19)       0.002726    113.0   162.3
   3.6196    175(19)       0.002905    113.0   163.0
   3.6206    181(19)       0.002784    113.0   163.9
   3.6216    155(17)       0.003273    113.0   164.9
   3.6226    178(19)       0.002843    113.0   166.1
   3.6236    186(19)       0.002714    113.0   167.4
   3.6246    153(17)       0.003346    113.0   168.9
   3.6256    173(18)       0.002940    113.0   170.7
   3.6266    203(20)       0.002497    113.0   172.7
   3.6276    202(20)       0.002488    113.0   175.2
   3.6286    171(18)       0.002965    113.0   178.3
   3.6296    176(19)       0.002890    113.0   182.1
   3.6306    185(19)       0.002769    113.0   187.1
   3.6316    208(20)       0.002459    113.0   194.3
   3.6326    206(20)       0.002457    113.1   205.9
   3.6336    208(20)       0.002434    113.1   226.1
   3.6346    260(23)       0.001942    113.1   262.5
   3.6356    299(24)       0.001692    113.1   326.4
   3.6366    335(26)       0.001512    113.1   430.9
   3.6376    418(29)       0.001212    113.1   585.4
   3.6386    651(36)       0.000780    113.    789.
   3.6396    875(42)       0.000580    113.    1020.
   3.6406    1151(48)      0.000440    113.    1235.
   3.6416    1287(51)      0.000392    113.    1370.
   3.6426    1430(53)      0.000353    113.    1368.
   3.6436    1273(50)      0.000398    113.    1231.
   3.6446    1025(45)      0.000496    113.    1016.
   3.6456    733(38)       0.000693    113.    784.
   3.6466    514(32)       0.000996    113.1   582.3
   3.6476    373(27)       0.001356    113.1   428.9
   3.6486    294(24)       0.001731    113.1   325.7
   3.6496    241(22)       0.002101    113.1   262.6
   3.6506    242(22)       0.002082    113.1   226.7
   3.6516    239(22)       0.002109    113.1   206.9
   3.6526    196(20)       0.002574    113.2   195.6
   3.6536    209(20)       0.002396    113.2   188.6
   3.6546    193(20)       0.002619    113.2   183.7
   3.6556    207(20)       0.002429    113.2   180.1
   3.6566    209(20)       0.002410    113.2   177.2
   3.6576    179(19)       0.002820    113.2   174.9
   3.6586    166(18)       0.003065    113.2   172.9
   3.6596    160(18)       0.003177    113.2   171.3
   3.6606    150(17)       0.003390    113.2   169.9
   3.6616    166(18)       0.003069    113.2   168.8
   3.6626    179(19)       0.002814    113.2   167.8
   3.6636    175(19)       0.002892    113.2   166.9
   3.6646    155(18)       0.003264    113.2   166.2
   3.6656    159(18)       0.003202    113.2   165.5
   3.6666    142(17)       0.00357     113.2   165.0
   3.6676    177(19)       0.002848    113.2   164.5
   3.6686    174(19)       0.002918    113.2   164.1
   3.6696    164(18)       0.003107    113.2   163.7
   3.6706    178(19)       0.002884    113.2   163.4
   3.6716    137(16)       0.00367     113.2   163.1
   3.6726    141(17)       0.00362     113.2   162.8
   3.6736    167(18)       0.003054    113.3   162.6
   3.6746    177(19)       0.002856    113.3   162.4
   3.6756    152(17)       0.003346    113.3   162.2
   3.6766    167(18)       0.003056    113.3   162.1
   3.6776    149(17)       0.003421    113.3   161.9
   3.6786    165(18)       0.003077    113.3   161.8
   3.6796    153(17)       0.003300    113.3   161.7
   3.6806    164(18)       0.003087    113.3   161.6
   3.6816    148(17)       0.003419    113.3   161.5
   3.6826    154(17)       0.003335    113.3   161.5
   3.6836    166(18)       0.003055    113.3   161.4
   3.6846    160(18)       0.003173    113.3   161.4
   3.6856    165(18)       0.003068    113.3   161.3
   3.6866    169(18)       0.002998    113.3   161.3
   3.6876    185(19)       0.002758    113.3   161.3
   3.6886    174(19)       0.002921    113.3   161.3
   3.6896    170(18)       0.002999    113.3   161.2
   3.6906    176(19)       0.002875    113.3   161.2
   3.6916    158(18)       0.003214    113.3   161.2
   3.6926    157(18)       0.003220    113.3   161.2
   3.6936    145(17)       0.00352     113.4   161.2
   3.6946    169(18)       0.002999    113.4   161.3
   3.6956    153(17)       0.003323    113.4   161.3
   3.6966    158(18)       0.003251    113.4   161.3
   3.6976    171(18)       0.002974    113.4   161.3
   3.6986    163(18)       0.003089    113.4   161.3
   3.6996    164(18)       0.003064    113.4   161.4
   3.7006    149(17)       0.003408    113.4   161.4
   3.7016    164(18)       0.003074    113.4   161.4
   3.7026    162(18)       0.003122    113.4   161.5
   3.7036    166(18)       0.003038    113.4   161.5
   3.7046    169(18)       0.002984    113.4   161.5
   3.7056    158(18)       0.003187    113.4   161.6
   3.7066    162(18)       0.003114    113.4   161.6
   3.7076    159(18)       0.003163    113.4   161.7
   3.7086    172(18)       0.002963    113.4   161.7
   3.7096    166(18)       0.003072    113.4   161.7
   3.7106    161(18)       0.003154    113.4   161.8
   3.7116    164(18)       0.003116    113.4   161.8
   3.7126    139(17)       0.00366     113.4   161.9
   3.7136    170(18)       0.002974    113.5   161.9
   3.7146    167(18)       0.003037    113.5   162.0
   3.7156    176(19)       0.002917    113.5   162.0
   3.7166    173(18)       0.002929    113.5   162.1
   3.7176    135(16)       0.00373     113.5   162.2
   3.7186    143(17)       0.00351     113.5   162.2
   3.7196    161(18)       0.003131    113.5   162.3
   3.7206    172(18)       0.002941    113.5   162.3
   3.7216    164(18)       0.003116    113.5   162.4
   3.7226    155(17)       0.003301    113.5   161.7
   3.7236    141(17)       0.00361     113.5   161.8
   3.7246    147(17)       0.003470    113.5   161.9
   3.7256    148(17)       0.003402    113.5   162.0
   3.7266    159(18)       0.003198    113.5   162.1
   3.7276    171(18)       0.002979    113.5   162.1
   3.7286    164(18)       0.003087    113.5   162.2
   3.7296    159(18)       0.003195    113.5   162.3
   3.7306    174(19)       0.002901    113.5   162.4
   3.7316    167(18)       0.003022    113.5   162.4
   3.7326    174(19)       0.002906    113.5   162.5
   3.7336    174(18)       0.002922    113.5   162.6
   3.7346    164(18)       0.003122    113.6   162.7
   3.7356    172(18)       0.002945    113.6   162.8
   3.7366    156(17)       0.003279    113.6   162.8
   3.7376    177(19)       0.002874    113.6   162.9
   3.7386    166(18)       0.003069    113.6   163.0
   3.7396    179(19)       0.002839    113.6   163.1
   3.7406    176(19)       0.002901    113.6   163.2
   3.7416    159(18)       0.003205    113.6   163.2
   3.7426    164(18)       0.003074    113.6   163.3
   3.7436    161(18)       0.003140    113.6   163.4
   3.7446    165(18)       0.003075    113.6   163.5
   3.7456    186(19)       0.002722    113.6   163.5
   3.7466    159(18)       0.003189    113.6   163.6
   3.7476    172(18)       0.002962    113.6   163.7
   3.7486    186(19)       0.002716    113.6   163.8
   3.7496    171(18)       0.002969    113.6   163.9
   3.7506    157(18)       0.003222    113.6   163.9
   3.7516    146(17)       0.003463    113.6   164.0
   3.7526    139(17)       0.00366     113.6   164.1
   3.7536    166(18)       0.003072    113.6   164.2
   3.7546    153(17)       0.003334    113.7   164.3
   3.7556    173(18)       0.002939    113.7   164.3
   3.7566    173(18)       0.002945    113.7   164.4
   3.7576    178(19)       0.002833    113.7   164.5
   3.7586    177(19)       0.002845    113.7   164.6
   3.7596    180(19)       0.002800    113.7   164.7
   3.7606    177(19)       0.002860    113.7   164.7
   3.7616    152(17)       0.003330    113.7   164.8
   3.7626    172(18)       0.002943    113.7   164.9
   3.7636    162(18)       0.003130    113.7   165.0
   3.7646    181(19)       0.002793    113.7   165.1
   3.7656    175(19)       0.002905    113.7   165.2
   3.7666    175(19)       0.002892    113.7   165.2
   3.7676    144(17)       0.00358     113.7   165.3
   3.7686    129(16)       0.00396     113.7   165.4
   3.7696    177(19)       0.002864    113.7   165.5
   3.7706    165(18)       0.003086    113.7   165.6
   3.7716    155(17)       0.003268    113.7   165.6
   3.7726    164(18)       0.003104    113.7   165.7
   3.7736    177(19)       0.002873    113.7   165.8
   3.7746    151(17)       0.003367    113.7   165.9
   3.7756    163(18)       0.003120    113.8   166.0
   3.7766    171(18)       0.002967    113.8   166.0
   3.7776    171(18)       0.002964    113.8   166.1
   3.7786    184(19)       0.002782    113.8   166.2
   3.7796    183(19)       0.002770    113.8   166.3
   3.7806    153(17)       0.003319    113.8   166.4
   3.7816    172(18)       0.002960    113.8   166.5
   3.7826    198(20)       0.002578    113.8   166.5
   3.7836    179(19)       0.002828    113.8   166.6
   3.7846    176(19)       0.002896    113.8   166.7
   3.7856    200(20)       0.002541    113.8   166.8
   3.7866    182(19)       0.002789    113.8   166.9
   3.7876    181(19)       0.002790    113.8   167.0
   3.7886    157(18)       0.003216    113.8   167.0
   3.7896    167(18)       0.003043    113.8   167.1
   3.7906    185(19)       0.002732    113.8   167.2
   3.7916    197(20)       0.002575    113.8   167.3
   3.7926    168(18)       0.003033    113.8   167.4
   3.7936    153(17)       0.003331    113.8   167.4
   3.7946    158(18)       0.003205    113.8   167.5
   3.7956    140(17)       0.00360     113.9   167.6
   3.7966    143(17)       0.00358     113.9   167.7
   3.7976    183(19)       0.002755    113.9   167.8
   3.7986    164(18)       0.003080    113.9   167.9
   3.7996    167(18)       0.003044    113.9   167.9
   3.8006    180(19)       0.002826    113.9   168.0
   3.8016    173(19)       0.002899    113.9   168.1
   3.8026    167(18)       0.003011    113.9   168.2
   3.8036    177(19)       0.002880    113.9   168.3
   3.8046    167(18)       0.003052    113.9   168.4
   3.8056    144(17)       0.00351     113.9   168.4
   3.8066    153(17)       0.003305    113.9   168.5
   3.8076    150(17)       0.003386    113.9   168.6
   3.8086    179(19)       0.002842    113.9   168.7
   3.8096    189(19)       0.002685    113.9   168.8
   3.8106    180(19)       0.002826    113.9   168.9
   3.8116    177(19)       0.002877    113.9   169.0
   3.8126    173(18)       0.002959    113.9   169.0
   3.8136    151(17)       0.003369    113.9   169.1
   3.8146    149(17)       0.003400    113.9   169.2
   3.8156    185(19)       0.002743    113.9   169.3
   3.8166    190(19)       0.002658    114.0   169.4
   3.8176    161(18)       0.003131    114.0   169.5
   3.8186    148(17)       0.003454    114.0   169.5
   3.8196    154(17)       0.003310    114.0   169.6
   3.8206    146(17)       0.003472    114.0   169.7
   3.8216    162(18)       0.003128    114.0   169.8
   3.8226    172(18)       0.002955    114.0   169.9
   3.8236    181(19)       0.002799    114.0   170.0
   3.8246    164(18)       0.003080    114.0   170.0
   3.8256    139(17)       0.00363     114.0   170.1
   3.8266    167(18)       0.003073    114.0   170.2
   3.8276    172(18)       0.002984    114.0   170.3
   3.8286    165(18)       0.003101    114.0   170.4
   3.8296    169(18)       0.002996    114.0   170.5
   3.8306    164(18)       0.003096    114.0   170.6
   3.8316    173(18)       0.002935    114.0   170.6
   3.8326    181(19)       0.002774    114.0   170.7
   3.8336    164(18)       0.003080    114.0   170.8
   3.8346    173(19)       0.002911    114.0   170.9
   3.8356    186(19)       0.002715    114.0   171.0
   3.8366    173(18)       0.002936    114.0   171.1
   3.8376    171(18)       0.002983    114.1   171.2
   3.8386    151(17)       0.003378    114.1   171.2
   3.8396    161(18)       0.003136    114.1   171.3
   3.8406    201(20)       0.002519    114.1   171.4
   3.8416    186(19)       0.002723    114.1   171.5
   3.8426    185(19)       0.002728    114.1   171.6
   3.8436    177(19)       0.002839    114.1   171.7
   3.8446    180(19)       0.002809    114.1   171.8
   3.8456    200(20)       0.002536    114.1   171.8
   3.8466    206(20)       0.002443    114.1   171.9
   3.8476    172(18)       0.002931    114.1   172.0
   3.8486    167(18)       0.003031    114.1   172.1
   3.8496    180(19)       0.002819    114.1   172.2
   3.8506    177(19)       0.002861    114.1   172.3
   3.8516    189(19)       0.002679    114.1   172.4
   3.8526    181(19)       0.002783    114.1   172.5
   3.8536    164(18)       0.003072    114.1   172.5
   3.8546    179(19)       0.002818    114.1   172.6
   3.8556    168(18)       0.003030    114.1   172.7
   3.8566    176(19)       0.002877    114.1   172.8
   3.8576    179(19)       0.002827    114.2   172.9
   3.8586    180(19)       0.002805    114.2   173.0
   3.8596    151(17)       0.003331    114.2   173.1
   3.8606    181(19)       0.002813    114.2   173.1
   3.8616    144(17)       0.00354     114.2   173.2
   3.8626    149(17)       0.003428    114.2   173.3
   3.8636    169(18)       0.002982    114.2   173.4
   3.8646    168(18)       0.002991    114.2   173.5
   3.8656    185(19)       0.002745    114.2   173.6
   3.8666    168(18)       0.003019    114.2   173.7
   3.8676    183(19)       0.002755    114.2   173.8
   3.8686    169(18)       0.002997    114.2   173.8
   3.8696    142(17)       0.00360     114.2   173.9
   3.8706    161(18)       0.003163    114.2   174.0
   3.8716    190(19)       0.002674    114.2   174.1
   3.8726    185(19)       0.002734    114.2   174.2
   3.8736    190(19)       0.002655    114.2   174.3
   3.8746    205(20)       0.002474    114.2   174.4
   3.8756    154(17)       0.003308    114.2   174.5
   3.8766    146(17)       0.003447    114.2   174.5
   3.8776    205(20)       0.002496    114.2   174.6
   3.8786    191(19)       0.002661    114.3   174.7
   3.8796    183(19)       0.002756    114.3   174.8
   3.8806    187(19)       0.002724    114.3   174.9
   3.8816    187(19)       0.002726    114.3   175.0
   3.8826    173(19)       0.002921    114.3   175.1
   3.8836    173(18)       0.002927    114.3   175.2
   3.8846    176(19)       0.002876    114.3   175.2
   3.8856    176(19)       0.002873    114.3   175.3
   3.8866    177(19)       0.002846    114.3   175.4
   3.8876    167(18)       0.003032    114.3   175.5
   3.8886    172(18)       0.002966    114.3   175.6
   3.8896    162(18)       0.003164    114.3   175.7
   3.8906    190(19)       0.002664    114.3   175.8
   3.8916    198(20)       0.002547    114.3   175.9
   3.8926    184(19)       0.002734    114.3   176.0
   3.8936    173(18)       0.002932    114.3   176.0
   3.8946    188(19)       0.002703    114.3   176.1
   3.8956    151(17)       0.003373    114.3   176.2
   3.8966    180(19)       0.002823    114.3   176.3
   3.8976    173(19)       0.002912    114.3   176.4
   3.8986    190(19)       0.002652    114.3   176.5
   3.8996    211(20)       0.002406    114.4   176.6
   3.9006    189(19)       0.002675    114.4   176.7
   3.9016    189(19)       0.002682    114.4   176.8
   3.9026    169(18)       0.002985    114.4   176.8
   3.9036    170(18)       0.002984    114.4   176.9
   3.9046    169(18)       0.002974    114.4   177.0
   3.9056    165(18)       0.003093    114.4   177.1
   3.9066    164(18)       0.003086    114.4   177.2
   3.9076    162(18)       0.003092    114.4   177.3
   3.9086    145(17)       0.003473    114.4   177.4
   3.9096    175(19)       0.002887    114.4   177.5
   3.9106    166(18)       0.003052    114.4   177.6
   3.9116    173(19)       0.002921    114.4   177.6
   3.9126    191(19)       0.002643    114.4   177.7
   3.9136    164(18)       0.003080    114.4   177.8
   3.9146    210(20)       0.002416    114.4   177.9
   3.9156    213(21)       0.002376    114.4   178.0
   3.9166    176(19)       0.002865    114.4   178.1
   3.9176    154(17)       0.003287    114.4   178.2
   3.9186    185(19)       0.002757    114.4   178.3
   3.9196    179(19)       0.002865    114.4   178.4
   3.9206    150(17)       0.003422    114.5   178.4
   3.9216    181(19)       0.002787    114.5   178.5
   3.9226    155(17)       0.003283    114.5   178.6
   3.9236    163(18)       0.003133    114.5   178.7
   3.9246    184(19)       0.002766    114.5   178.8
   3.9256    163(18)       0.003095    114.5   178.9
   3.9266    160(18)       0.003157    114.5   179.0
   3.9276    176(19)       0.002853    114.5   179.1
   3.9286    185(19)       0.002743    114.5   179.2
   3.9296    171(18)       0.002950    114.5   179.3
   3.9306    199(20)       0.002553    114.5   179.3
   3.9316    213(21)       0.002375    114.5   179.4
   3.9326    179(19)       0.002817    114.5   179.5
   3.9336    156(18)       0.003221    114.5   179.6
   3.9346    181(19)       0.002798    114.5   179.7
   3.9356    172(18)       0.002947    114.5   179.8
   3.9366    164(18)       0.003093    114.5   179.9
   3.9376    170(18)       0.002990    114.5   180.0
   3.9386    171(18)       0.002963    114.5   180.1
   3.9396    190(19)       0.002675    114.5   180.2
   3.9406    191(19)       0.002644    114.6   180.2
   3.9416    199(20)       0.002546    114.6   180.3
   3.9426    174(19)       0.002916    114.6   180.4
   3.9436    172(18)       0.002936    114.6   180.5
   3.9446    210(20)       0.002403    114.6   180.6
   3.9456    138(16)       0.00373     114.6   180.7
   3.9466    167(18)       0.003043    114.6   180.8
   3.9476    156(18)       0.003246    114.6   180.9
   3.9486    136(16)       0.00372     114.6   181.0
   3.9496    178(19)       0.002882    114.6   181.1
   3.9506    162(18)       0.003130    114.6   181.2
   3.9516    165(18)       0.003054    114.6   181.3
   3.9526    164(18)       0.003064    114.6   181.4
   3.9536    161(18)       0.003116    114.6   181.5
   3.9546    193(20)       0.002612    114.6   181.6
   3.9556    200(20)       0.002550    114.6   181.7
   3.9566    159(18)       0.003192    114.6   181.8
   3.9576    175(19)       0.002889    114.6   181.9
   3.9586    174(19)       0.002917    114.6   182.0
   3.9596    179(19)       0.002847    114.6   182.0
   3.9606    196(20)       0.002580    114.6   182.1
   3.9616    166(18)       0.003048    114.7   182.2
   3.9626    187(19)       0.002712    114.7   182.3
   3.9636    185(19)       0.002787    114.7   182.4
   3.9646    181(19)       0.002791    114.7   182.5
   3.9656    191(19)       0.002660    114.7   182.6
   3.9666    184(19)       0.002757    114.7   182.7
   3.9676    185(19)       0.002752    114.7   182.8
   3.9686    186(19)       0.002714    114.7   196.6
   3.9696    168(18)       0.003015    114.7   197.1
   3.9706    179(19)       0.002876    114.7   197.5
   3.9716    185(19)       0.002758    114.7   198.0
   3.9726    173(19)       0.002895    114.7   198.6
   3.9736    207(20)       0.002438    114.7   199.1
   3.9746    210(20)       0.002415    114.7   199.7
   3.9756    196(20)       0.002571    114.7   200.5
   3.9766    211(20)       0.002387    114.7   201.1
   3.9776    160(18)       0.003152    114.7   201.7
   3.9786    166(18)       0.003070    114.7   202.4
   3.9796    200(20)       0.002510    114.7   203.1
   3.9806    191(19)       0.002649    114.7   203.8
   3.9816    204(20)       0.002477    114.7   204.6
   3.9826    183(19)       0.002755    114.8   205.3
   3.9836    184(19)       0.002737    114.8   206.2
   3.9846    204(20)       0.002490    114.8   207.0
   3.9856    187(19)       0.002703    114.8   207.9
   3.9866    231(21)       0.002190    114.8   208.8
   3.9876    219(21)       0.002311    114.8   209.8
   3.9886    194(20)       0.002599    114.8   210.9
   3.9896    202(20)       0.002498    114.8   212.0
   3.9906    211(20)       0.002414    114.8   213.1
   3.9916    181(19)       0.002792    114.8   214.3
   3.9926    200(20)       0.002546    114.8   215.6
   3.9936    185(19)       0.002738    114.8   217.0
   3.9946    175(19)       0.002917    114.8   218.4
   3.9956    206(20)       0.002481    114.8   219.9
   3.9966    206(20)       0.002462    114.8   221.5
   3.9976    210(20)       0.002413    114.8   223.2
   3.9986    228(19)       0.002828    114.8   225.1
   3.9996    241(19)       0.002687    114.8   227.0
   4.0006    255(20)       0.002520    114.8   229.1
   4.0016    240(19)       0.002706    114.8   231.3
   4.0026    216(18)       0.002978    114.8   233.7
   4.0036    205(18)       0.003155    114.9   236.3
   4.0046    224(19)       0.002877    114.9   239.1
   4.0056    243(19)       0.002657    114.9   242.1
   4.0066    246(20)       0.002610    114.9   245.4
   4.0076    255(20)       0.002524    114.9   248.9
   4.0086    224(19)       0.002909    114.9   252.7
   4.0096    229(19)       0.002864    114.9   256.9
   4.0106    211(18)       0.003083    114.9   261.5
   4.0116    233(19)       0.002789    114.9   266.6
   4.0126    240(19)       0.002705    114.9   272.2
   4.0136    254(20)       0.002585    114.9   278.4
   4.0146    262(20)       0.002502    114.9   285.5
   4.0156    297(21)       0.002183    114.9   293.6
   4.0166    281(21)       0.002297    114.9   303.3
   4.0176    290(21)       0.002219    114.9   315.5
   4.0186    318(22)       0.002030    114.9   331.3
   4.0196    332(23)       0.001938    114.9   352.2
   4.0206    395(25)       0.001648    114.9   379.3
   4.0216    444(26)       0.001461    114.9   412.7
   4.0226    466(27)       0.001387    114.9   450.3
   4.0236    546(29)       0.001187    114.9   488.2
   4.0246    621(31)       0.001041    115.0   520.7
   4.0256    639(31)       0.001012    115.0   543.9
   4.0266    621(31)       0.001044    115.0   560.2
   4.0276    613(31)       0.001056    115.0   576.5
   4.0286    608(31)       0.001063    115.0   600.2
   4.0296    605(31)       0.001068    115.0   637.7
   4.0306    639(31)       0.001009    115.0   695.3
   4.0316    758(34)       0.000857    115.0   783.1
   4.0326    907(37)       0.000715    115.    923.
   4.0336    1164(42)      0.000558    115.    1164.
   4.0346    1484(48)      0.000437    115.    1598.
   4.0356    2083(57)      0.0003130   115.    2383.
   4.0366    3024(68)      0.0002156   115.    3726.
   4.0376    4634(84)      0.0001410   115.    5840.
   4.0386    7260(110)     0.0000901   115.    8823.
   4.0396    11180(130)    0.0000583   115.    12521.
   4.0406    16210(160)    0.0000400   115.    16405.
   4.0416    20550(180)    0.0000314   115.    19558.
   4.0426    23250(190)    0.0000277   115.    20856.
   4.0436    22800(190)    0.0000283   115.    19718.
   4.0446    18920(170)    0.0000342   115.    16681.
   4.0456    13520(140)    0.0000480   115.    12861.
   4.0466    8500(110)     0.0000769   115.    9210.
   4.0476    5341(91)      0.0001218   115.    6275.
   4.0486    3687(75)      0.0001763   115.    4206.
   4.0496    2783(66)      0.0002329   115.    2894.
   4.0506    2223(59)      0.0002918   115.    2103.
   4.0516    1777(52)      0.000365    115.    1612.
   4.0526    1425(47)      0.000454    115.    1279.
   4.0536    1054(40)      0.000617    115.    1035.
   4.0546    800(35)       0.000815    115.1   851.1
   4.0556    706(33)       0.000921    115.1   714.7
   4.0566    623(31)       0.001041    115.1   616.3
   4.0576    546(29)       0.001183    115.1   546.2
   4.0586    507(28)       0.001277    115.1   495.6
   4.0596    443(26)       0.001463    115.1   457.7
   4.0606    426(26)       0.001519    115.1   427.8
   4.0616    413(25)       0.001569    115.1   403.4
   4.0626    367(24)       0.001773    115.1   382.8
   4.0636    363(24)       0.001788    115.1   365.1
   4.0646    336(23)       0.001941    115.1   349.9
   4.0656    323(22)       0.002011    115.1   336.6
   4.0666    306(22)       0.002121    115.2   324.9
   4.0676    291(21)       0.002229    115.2   314.6
   4.0686    295(21)       0.002192    115.2   305.4
   4.0696    292(21)       0.002225    115.2   297.3
   4.0706    305(22)       0.002127    115.2   290.1
   4.0716    293(21)       0.002224    115.2   283.5
   4.0726    257(20)       0.002533    115.2   277.7
   4.0736    269(20)       0.002409    115.2   272.3
   4.0746    256(20)       0.002544    115.2   267.5
   4.0756    251(20)       0.002597    115.2   263.2
   4.0766    246(19)       0.002642    115.2   259.2
   4.0776    275(21)       0.002359    115.2   255.5
   4.0786    231(19)       0.002812    115.2   252.2
   4.0796    246(19)       0.002642    115.2   249.1
   4.0806    263(20)       0.002441    115.2   246.3
   4.0816    259(20)       0.002487    115.2   243.7
   4.0826    257(20)       0.002494    115.2   241.3
   4.0836    236(19)       0.002730    115.2   239.1
   4.0846    228(19)       0.002836    115.2   237.0
   4.0856    241(19)       0.002705    115.2   235.1
   4.0866    238(19)       0.002728    115.2   233.3
   4.0876    237(19)       0.002718    115.2   231.7
   4.0886    237(19)       0.002723    115.3   230.1
   4.0896    257(20)       0.002518    115.3   228.7
   4.0906    246(20)       0.002616    115.3   227.3
   4.0916    227(19)       0.002835    115.3   226.1
   4.0926    225(19)       0.002887    115.3   224.9
   4.0936    210(18)       0.003091    115.3   223.8
   4.0946    209(18)       0.003082    115.3   222.8
   4.0956    220(19)       0.002913    115.3   221.8
   4.0966    225(19)       0.002856    115.3   220.9
   4.0976    223(19)       0.002875    115.3   220.0
   4.0986    216(18)       0.003001    115.3   219.2
   4.0996    223(19)       0.002893    115.3   218.5
   4.1006    211(18)       0.003036    115.3   217.7
   4.1016    193(17)       0.003364    115.3   217.1
   4.1026    205(18)       0.003178    115.3   216.4
   4.1036    221(18)       0.002929    115.3   215.8
   4.1046    248(20)       0.002612    115.3   215.2
   4.1056    240(19)       0.002706    115.3   214.6
   4.1066    208(18)       0.003106    115.3   214.1
   4.1076    190(17)       0.003406    115.3   213.7
   4.1086    208(18)       0.003107    115.3   213.2
   4.1096    214(18)       0.003042    115.4   212.8
   4.1106    207(18)       0.003126    115.4   212.4
   4.1116    200(18)       0.003248    115.4   212.0
   4.1126    181(17)       0.00356     115.4   211.6
   4.1136    215(18)       0.003016    115.4   211.3
   4.1146    243(19)       0.002654    115.4   210.9
   4.1156    202(18)       0.003193    115.4   210.6
   4.1166    191(17)       0.003353    115.4   210.3
   4.1176    196(17)       0.003266    115.4   210.0
   4.1186    197(17)       0.003274    115.4   209.8
   4.1196    191(17)       0.003407    115.4   209.5
   4.1206    208(18)       0.003154    115.4   209.3
   4.1216    219(18)       0.002985    115.4   209.1
   4.1226    223(19)       0.002892    115.4   208.8
   4.1236    208(18)       0.003093    115.4   197.2
   4.1246    199(18)       0.003235    115.4   197.3
   4.1256    202(18)       0.003200    115.4   197.4
   4.1266    202(18)       0.003217    115.4   197.5
   4.1276    194(17)       0.003322    115.4   197.5
   4.1286    180(17)       0.00360     115.4   197.6
   4.1296    190(17)       0.003443    115.4   197.7
   4.1306    219(18)       0.002951    115.5   197.6
   4.1316    223(19)       0.002887    115.5   197.7
   4.1326    213(18)       0.003051    115.5   197.8
   4.1336    221(18)       0.002930    115.5   197.9
   4.1346    210(18)       0.003084    115.5   197.9
   4.1356    216(18)       0.002999    115.5   198.0
   4.1366    207(18)       0.003119    115.5   198.1
   4.1376    211(18)       0.003049    115.5   198.2
   4.1386    216(18)       0.003006    115.5   198.3
   4.1396    215(18)       0.003015    115.5   198.4
   4.1406    190(17)       0.003396    115.5   198.5
   4.1416    198(18)       0.003254    115.5   198.6
   4.1426    190(17)       0.003405    115.5   198.7
   4.1436    196(17)       0.003298    115.5   198.8
   4.1446    182(17)       0.00354     115.5   198.9
   4.1456    172(16)       0.00375     115.5   198.9
   4.1466    179(17)       0.00358     115.5   199.0
   4.1476    185(17)       0.003506    115.5   199.1
   4.1486    204(18)       0.003185    115.5   199.2
   4.1496    199(17)       0.003303    115.5   199.3
   4.1506    207(18)       0.003136    115.5   199.4
   4.1516    219(18)       0.002941    115.6   199.5
   4.1526    210(18)       0.003072    115.6   199.6
   4.1536    194(17)       0.003338    115.6   199.7
   4.1546    195(17)       0.003307    115.6   199.8
   4.1556    201(18)       0.003232    115.6   199.8
   4.1566    184(17)       0.00351     115.6   199.9
   4.1576    190(17)       0.003387    115.6   200.0
   4.1586    198(17)       0.003280    115.6   200.1
   4.1596    196(17)       0.003326    115.6   200.2
   4.1606    200(18)       0.003227    115.6   200.3
   4.1616    195(17)       0.003319    115.6   200.4
   4.1626    200(18)       0.003239    115.6   200.5
   4.1636    182(17)       0.00356     115.6   200.6
   4.1646    192(17)       0.003377    115.6   200.7
   4.1656    219(18)       0.002960    115.6   200.7
   4.1666    227(19)       0.002864    115.6   200.8
   4.1676    222(19)       0.002918    115.6   200.9
   4.1686    215(18)       0.002999    115.6   201.0
   4.1696    195(17)       0.003318    115.6   201.1
   4.1706    211(18)       0.003065    115.6   201.2
   4.1716    221(18)       0.002923    115.6   201.3
   4.1726    200(18)       0.003224    115.6   201.4
   4.1736    205(18)       0.003146    115.7   201.5
   4.1746    198(18)       0.003258    115.7   201.5
   4.1756    198(17)       0.003268    115.7   201.6
   4.1766    196(17)       0.003314    115.7   201.7
   4.1776    193(17)       0.003357    115.7   201.8
   4.1786    185(17)       0.003495    115.7   201.9
   4.1796    186(17)       0.003489    115.7   202.0
   4.1806    206(18)       0.003108    115.7   202.1
   4.1816    187(17)       0.003475    115.7   202.2
   4.1826    186(17)       0.003498    115.7   202.3
   4.1836    192(17)       0.003417    115.7   202.4
   4.1846    172(16)       0.00382     115.7   202.4
   4.1856    199(18)       0.003246    115.7   202.5
   4.1866    208(18)       0.003121    115.7   202.6
   4.1876    179(17)       0.00364     115.7   202.7
   4.1886    172(16)       0.00381     115.7   202.8
   4.1896    190(17)       0.003463    115.7   202.9
   4.1906    185(17)       0.00352     115.7   203.0
   4.1916    185(17)       0.00351     115.7   203.1
   4.1926    195(17)       0.003316    115.7   203.2
   4.1936    194(17)       0.003342    115.7   203.2
   4.1946    192(17)       0.003381    115.8   203.3
   4.1956    186(17)       0.00354     115.8   203.4
   4.1966    192(17)       0.003401    115.8   203.5
   4.1976    200(18)       0.003265    115.8   203.6
   4.1986    191(17)       0.003431    115.8   203.7
   4.1996    193(17)       0.003374    115.8   203.8
   4.2006    174(16)       0.00372     115.8   203.9
   4.2016    167(16)       0.00390     115.8   203.9
   4.2026    201(18)       0.003224    115.8   204.0
   4.2036    221(18)       0.002927    115.8   204.1
   4.2046    199(18)       0.003259    115.8   204.2
   4.2056    171(16)       0.00380     115.8   204.3
   4.2066    176(16)       0.00370     115.8   204.4
   4.2076    200(18)       0.003238    115.8   204.5
   4.2086    209(18)       0.003107    115.8   204.6
   4.2096    196(17)       0.003321    115.8   204.7
   4.2106    192(17)       0.003356    115.8   204.7
   4.2116    163(16)       0.00397     115.8   204.8
   4.2126    189(17)       0.003461    115.8   204.9
   4.2136    209(18)       0.003093    115.8   205.0
   4.2146    218(18)       0.002965    115.8   205.1
   4.2156    204(18)       0.003186    115.9   205.2
   4.2166    195(17)       0.003346    115.9   205.3
   4.2176    202(18)       0.003219    115.9   205.4
   4.2186    200(18)       0.003242    115.9   205.4
   4.2196    198(17)       0.003285    115.9   205.5
   4.2206    178(17)       0.00365     115.9   205.6
   4.2216    193(17)       0.003353    115.9   205.7
   4.2226    187(17)       0.003461    115.9   205.8
   4.2236    190(17)       0.003411    115.9   205.9
   4.2246    172(16)       0.00380     115.9   206.0
   4.2256    195(17)       0.003343    115.9   206.1
   4.2266    200(17)       0.003270    115.9   206.1
   4.2276    179(17)       0.00365     115.9   206.2
   4.2286    204(18)       0.003173    115.9   206.3
   4.2296    194(17)       0.003342    115.9   206.4
   4.2306    203(18)       0.003211    115.9   206.5
   4.2316    231(19)       0.002819    115.9   206.6
   4.2326    203(18)       0.003198    115.9   206.7
   4.2336    183(17)       0.00353     115.9   206.8
   4.2346    203(18)       0.003169    115.9   206.8
   4.2356    209(18)       0.003099    115.9   206.9
   4.2366    205(18)       0.003163    115.9   207.0
   4.2376    196(17)       0.003312    116.0   207.1
   4.2386    206(18)       0.003146    116.0   207.2
   4.2396    213(18)       0.003034    116.0   207.3
   4.2406    205(18)       0.003191    116.0   207.4
   4.2416    183(17)       0.00359     116.0   207.4
   4.2426    186(17)       0.00351     116.0   207.5
   4.2436    194(17)       0.003334    116.0   207.6
   4.2446    180(17)       0.00361     116.0   207.7
   4.2456    184(17)       0.003504    116.0   207.8
   4.2466    192(17)       0.003373    116.0   207.9
   4.2476    198(18)       0.003255    116.0   208.0
   4.2486    204(18)       0.003166    116.0   208.1
   4.2496    198(17)       0.003266    116.0   208.1
   4.2506    216(18)       0.003001    116.0   208.2
   4.2516    216(18)       0.003017    116.0   208.3
   4.2526    219(18)       0.002959    116.0   208.4
   4.2536    208(18)       0.003123    116.0   208.5
   4.2546    218(18)       0.002949    116.0   208.6
   4.2556    212(18)       0.003036    116.0   208.7
   4.2566    185(17)       0.003472    116.0   208.7
   4.2576    200(18)       0.003238    116.0   208.8
   4.2586    207(18)       0.003126    116.1   208.9
   4.2596    220(19)       0.002922    116.1   209.0
   4.2606    211(18)       0.003071    116.1   209.1
   4.2616    198(17)       0.003297    116.1   209.2
   4.2626    192(17)       0.003398    116.1   209.3
   4.2636    195(17)       0.003322    116.1   209.3
   4.2646    200(18)       0.003238    116.1   209.4
   4.2656    199(18)       0.003255    116.1   209.5
   4.2666    218(18)       0.002960    116.1   209.6
   4.2676    203(18)       0.003210    116.1   209.7
   4.2686    213(18)       0.003058    116.1   209.8
   4.2696    205(18)       0.003189    116.1   209.8
   4.2706    187(17)       0.003461    116.1   209.9
   4.2716    212(18)       0.003040    116.1   210.0
   4.2726    191(17)       0.003393    116.1   210.1
   4.2736    194(17)       0.003350    116.1   210.2
   4.2746    200(18)       0.003256    116.1   210.3
   4.2756    224(19)       0.002906    116.1   210.4
   4.2766    224(18)       0.002937    116.1   210.4
   4.2776    204(18)       0.003178    116.1   210.5
   4.2786    202(18)       0.003197    116.1   210.6
   4.2796    201(18)       0.003219    116.1   210.7
   4.2806    211(18)       0.003057    116.2   210.8
   4.2816    219(18)       0.002926    116.2   210.9
   4.2825    222(19)       0.002885    116.2   210.9
   4.2835    214(18)       0.002991    116.2   211.0
   4.2845    215(18)       0.003016    116.2   211.1
   4.2855    225(19)       0.002879    116.2   211.2
   4.2865    203(18)       0.003187    116.2   211.3
   4.2875    200(18)       0.003234    116.2   211.4
   4.2885    226(19)       0.002852    116.2   211.5
   4.2895    224(19)       0.002878    116.2   211.5
   4.2905    233(19)       0.002770    116.2   211.6
   4.2915    210(18)       0.003070    116.2   211.7
   4.2925    198(18)       0.003257    116.2   211.8
   4.2935    193(17)       0.003345    116.2   211.9
   4.2945    211(18)       0.003054    116.2   212.0
   4.2955    203(18)       0.003210    116.2   212.0
   4.2965    207(18)       0.003144    116.2   212.1
   4.2975    201(18)       0.003207    116.2   212.2
   4.2985    218(18)       0.002965    116.2   212.3
   4.2995    227(19)       0.002837    116.2   212.4
   4.3005    217(18)       0.002978    116.2   212.5
   4.3015    230(19)       0.002805    116.2   212.5
   4.3025    223(19)       0.002910    116.3   212.6
   4.3035    209(18)       0.003118    116.3   212.7
   4.3045    197(17)       0.003304    116.3   212.8
   4.3055    198(17)       0.003287    116.3   212.9
   4.3065    207(18)       0.003128    116.3   212.9
   4.3075    209(18)       0.003097    116.3   213.0
   4.3085    198(18)       0.003256    116.3   213.1
   4.3095    208(18)       0.003107    116.3   218.0
   4.3105    217(18)       0.002974    116.3   218.3
   4.3115    246(20)       0.002616    116.3   218.5
   4.3125    212(18)       0.003047    116.3   218.7
   4.3135    194(17)       0.003349    116.3   218.9
   4.3145    231(19)       0.002800    116.3   219.2
   4.3155    242(19)       0.002676    116.3   219.4
   4.3165    205(18)       0.003141    116.3   219.7
   4.3175    217(18)       0.002985    116.3   219.9
   4.3185    210(18)       0.003079    116.3   220.2
   4.3195    186(17)       0.003480    116.3   220.5
   4.3205    206(18)       0.003130    116.3   220.8
   4.3215    224(19)       0.002870    116.3   221.1
   4.3225    215(18)       0.003006    116.3   221.4
   4.3235    201(18)       0.003211    116.4   221.7
   4.3245    190(17)       0.003405    116.4   222.0
   4.3255    178(17)       0.00364     116.4   222.4
   4.3265    213(18)       0.003049    116.4   222.7
   4.3275    242(19)       0.002686    116.4   223.1
   4.3285    250(20)       0.002590    116.4   223.5
   4.3295    213(18)       0.003040    116.4   223.9
   4.3305    200(18)       0.003253    116.4   224.3
   4.3315    206(18)       0.003159    116.4   224.7
   4.3325    206(18)       0.003137    116.4   225.2
   4.3335    207(18)       0.003126    116.4   225.7
   4.3345    215(18)       0.003001    116.4   226.2
   4.3355    188(17)       0.003416    116.4   226.7
   4.3365    176(16)       0.00368     116.4   227.3
   4.3375    204(18)       0.003169    116.4   227.9
   4.3385    193(17)       0.003358    116.4   228.5
   4.3395    204(18)       0.003157    116.4   229.2
   4.3405    232(19)       0.002798    116.4   229.9
   4.3415    246(19)       0.002635    116.4   230.7
   4.3425    233(19)       0.002762    116.4   231.5
   4.3435    232(19)       0.002772    116.4   232.3
   4.3445    229(19)       0.002818    116.4   233.2
   4.3455    241(19)       0.002678    116.5   234.2
   4.3465    259(20)       0.002481    116.5   235.3
   4.3475    260(20)       0.002476    116.5   236.4
   4.3485    256(20)       0.002516    116.5   237.6
   4.3495    257(20)       0.002509    116.5   239.0
   4.3505    258(20)       0.002487    116.5   240.4
   4.3515    265(20)       0.002434    116.5   242.0
   4.3525    250(20)       0.002590    116.5   243.7
   4.3535    217(18)       0.003002    116.5   245.5
   4.3545    252(20)       0.002581    116.5   247.6
   4.3555    236(19)       0.002745    116.5   249.9
   4.3565    233(19)       0.002779    116.5   252.3
   4.3575    259(20)       0.002493    116.5   255.1
   4.3585    263(20)       0.002459    116.5   258.2
   4.3595    273(21)       0.002364    116.5   261.7
   4.3605    250(20)       0.002598    116.5   265.5
   4.3615    280(21)       0.002316    116.5   269.9
   4.3625    307(22)       0.002109    116.5   274.9
   4.3635    281(21)       0.002314    116.5   280.6
   4.3645    251(20)       0.002574    116.5   287.2
   4.3655    306(22)       0.002107    116.5   294.8
   4.3665    274(20)       0.002380    116.5   303.6
   4.3675    295(21)       0.002223    116.6   314.0
   4.3685    308(22)       0.002110    116.6   326.4
   4.3695    354(23)       0.001838    116.6   341.4
   4.3705    341(23)       0.001897    116.6   359.8
   4.3715    372(24)       0.001744    116.6   383.5
   4.3725    425(26)       0.001522    116.6   416.1
   4.3735    462(27)       0.001398    116.6   465.2
   4.3745    541(29)       0.001195    116.6   546.1
   4.3755    621(31)       0.001047    116.6   686.4
   4.3765    766(34)       0.000850    116.6   928.7
   4.3775    1095(41)      0.000597    117.    1329.
   4.3785    1699(51)      0.000383    117.    1940.
   4.3795    2467(62)      0.0002637   117.    2789.
   4.3805    3594(74)      0.0001808   117.    3838.
   4.3815    5057(88)      0.0001281   117.    4959.
   4.3825    6311(99)      0.0001022   117.    5922.
   4.3835    7310(110)     0.0000881   117.    6427.
   4.3845    7100(110)     0.0000910   117.    6263.
   4.3855    6308(99)      0.0001024   117.    5505.
   4.3865    4793(86)      0.0001351   117.    4432.
   4.3875    3279(71)      0.0001974   117.    3323.
   4.3885    2227(59)      0.0002914   117.    2359.
   4.3895    1459(47)      0.000446    117.    1623.
   4.3905    1040(40)      0.000625    117.    1117.
   4.3915    731(34)       0.000888    116.7   799.1
   4.3925    602(30)       0.001075    116.7   611.6
   4.3935    556(29)       0.001166    116.7   503.9
   4.3945    475(27)       0.001374    116.7   440.8
   4.3955    389(25)       0.001666    116.7   401.0
   4.3965    371(24)       0.001741    116.7   373.4
   4.3975    412(25)       0.001569    116.7   352.7
   4.3985    358(23)       0.001828    116.7   336.2
   4.3995    310(22)       0.002085    116.7   322.7
   4.4005    311(22)       0.002078    116.7   311.4
   4.4015    295(21)       0.002190    116.7   302.0
   4.4025    275(21)       0.002360    116.7   293.9
   4.4035    294(21)       0.002190    116.7   287.0
   4.4045    277(21)       0.002352    116.7   281.0
   4.4055    246(19)       0.002636    116.7   275.8
   4.4065    273(21)       0.002348    116.7   271.3
   4.4075    267(20)       0.002414    116.7   267.3
   4.4085    285(21)       0.002273    116.7   263.8
   4.4095    281(21)       0.002310    116.7   260.6
   4.4105    271(20)       0.002390    116.8   257.9
   4.4115    277(21)       0.002324    116.8   255.4
   4.4125    268(20)       0.002418    116.8   253.2
   4.4135    290(21)       0.002249    116.8   251.2
   4.4145    237(19)       0.002762    116.8   249.4
   4.4155    259(20)       0.002489    116.8   247.7
   4.4165    272(21)       0.002367    116.8   246.2
   4.4175    254(20)       0.002543    116.8   244.9
   4.4185    217(18)       0.002962    116.8   243.7
   4.4195    211(18)       0.003070    116.8   242.5
   4.4205    264(20)       0.002467    116.8   241.5
   4.4215    248(20)       0.002618    116.8   240.6
   4.4225    262(20)       0.002461    116.8   239.7
   4.4235    252(20)       0.002556    116.8   238.9
   4.4245    237(19)       0.002731    116.8   238.2
   4.4255    247(20)       0.002615    116.8   288.7
   4.4265    228(19)       0.002808    116.8   289.5
   4.4275    235(19)       0.002734    116.8   290.4
   4.4285    239(19)       0.002689    116.8   291.3
   4.4295    240(19)       0.002692    116.8   292.5
   4.4305    260(20)       0.002488    116.8   293.7
   4.4315    255(20)       0.002530    116.8   295.0
   4.4325    243(19)       0.002660    116.9   296.4
   4.4335    225(19)       0.002873    116.9   297.9
   4.4345    234(19)       0.002760    116.9   299.6
   4.4355    241(19)       0.002686    116.9   301.3
   4.4365    259(20)       0.002471    116.9   303.2
   4.4375    244(19)       0.002642    116.9   305.3
   4.4385    284(21)       0.002266    116.9   307.4
   4.4395    264(20)       0.002448    116.9   309.7
   4.4405    233(19)       0.002783    116.9   312.1
   4.4415    260(20)       0.002480    116.9   314.7
   4.4425    244(20)       0.002625    116.9   317.5
   4.4435    269(20)       0.002393    116.9   320.4
   4.4445    264(20)       0.002454    116.9   323.5
   4.4455    248(20)       0.002578    116.9   326.8
   4.4465    253(20)       0.002546    116.9   330.3
   4.4475    287(21)       0.002238    116.9   334.0
   4.4485    291(21)       0.002221    116.9   338.0
   4.4495    328(23)       0.001969    116.9   342.2
   4.4505    295(21)       0.002204    116.9   346.7
   4.4515    274(21)       0.002348    116.9   351.5
   4.4525    291(21)       0.002233    116.9   356.6
   4.4535    261(20)       0.002499    116.9   362.1
   4.4545    343(23)       0.001882    117.0   368.0
   4.4555    316(22)       0.002044    117.0   374.2
   4.4565    358(24)       0.001806    117.0   380.9
   4.4575    360(24)       0.001794    117.0   388.1
   4.4585    371(24)       0.001748    117.0   395.9
   4.4595    331(23)       0.001957    117.0   404.2
   4.4605    363(24)       0.001777    117.0   413.2
   4.4615    379(24)       0.001698    117.0   422.9
   4.4625    409(25)       0.001578    117.0   433.5
   4.4635    429(26)       0.001503    117.0   444.9
   4.4645    401(25)       0.001613    117.0   453.2
   4.4655    438(26)       0.001473    117.0   466.8
   4.4665    440(26)       0.001468    117.0   481.6
   4.4675    469(27)       0.001379    117.0   497.8
   4.4685    428(26)       0.001508    117.0   515.7
   4.4695    471(27)       0.001373    117.0   535.2
   4.4705    522(28)       0.001242    117.0   556.8
   4.4715    515(28)       0.001257    117.0   580.7
   4.4725    558(29)       0.001159    117.0   607.3
   4.4735    565(30)       0.001142    117.0   636.9
   4.4745    597(30)       0.001080    117.0   670.0
   4.4755    609(31)       0.001061    117.0   707.3
   4.4765    645(32)       0.001001    117.1   749.5
   4.4775    645(32)       0.001004    117.1   797.2
   4.4785    715(33)       0.000903    117.1   851.8
   4.4795    784(35)       0.000826    117.1   914.5
   4.4805    804(35)       0.000807    117.    987.
   4.4815    944(38)       0.000686    117.    1071.
   4.4825    1020(40)      0.000634    117.    1170.
   4.4835    1111(41)      0.000582    117.    1287.
   4.4845    1339(45)      0.000484    117.    1427.
   4.4855    1492(48)      0.000436    117.    1597.
   4.4865    1794(53)      0.000362    117.    1811.
   4.4875    2158(58)      0.0003007   117.    2093.
   4.4885    2518(62)      0.0002580   117.    2497.
   4.4895    3313(71)      0.0001962   117.    3133.
   4.4905    4310(81)      0.0001507   117.    4212.
   4.4915    5815(95)      0.0001116   117.    6097.
   4.4925    8380(110)     0.0000775   117.    9305.
   4.4935    12370(140)    0.0000526   117.    14450.
   4.4945    18880(170)    0.0000345   117.    22010.
   4.4955    28950(210)    0.0000224   117.    31993.
   4.4965    41350(250)    0.0000157   117.    43620.
   4.4975    55290(290)    0.0000117   117.    55032.
   4.4985    66460(320)    9.70e-6     117.    63370.
   4.4995    71520(330)    9.03e-6     117.    65585.
   4.5005    66400(320)    9.72e-6     117.    60700.
   4.5015    53640(290)    0.0000120   117.    50770.
   4.5025    40140(250)    0.0000161   117.    38982.
   4.5035    26930(200)    0.0000241   117.    27846.
   4.5045    17460(160)    0.0000372   117.    18761.
   4.5055    11350(130)    0.0000574   117.    12177.
   4.5065    7840(110)     0.0000829   117.    7860.
   4.5075    5614(93)      0.0001157   117.    5237.
   4.5085    4253(81)      0.0001526   117.    3720.
   4.5095    3418(72)      0.0001910   117.    2847.
   4.5105    2541(63)      0.0002554   117.    2321.
   4.5115    2132(57)      0.0003043   117.    1974.
   4.5125    1832(53)      0.000355    117.    1723.
   4.5135    1641(50)      0.000394    117.    1529.
   4.5145    1418(47)      0.000458    117.    1371.
   4.5155    1249(44)      0.000519    117.    1241.
   4.5165    1090(41)      0.000593    117.    1132.
   4.5175    1023(40)      0.000631    117.    1039.
   4.5185    939(38)       0.000690    117.    960.
   4.5195    829(36)       0.000783    117.    892.
   4.5205    800(35)       0.000810    117.    832.
   4.5215    781(35)       0.000831    117.3   780.8
   4.5225    768(34)       0.000841    117.3   735.4
   4.5235    684(33)       0.000944    117.3   695.5
   4.5245    611(31)       0.001059    117.3   660.0
   4.5255    616(31)       0.001048    117.3   628.4
   4.5265    555(29)       0.001160    117.3   600.2
   4.5275    536(29)       0.001201    117.3   574.8
   4.5285    513(28)       0.001267    117.3   552.0
   4.5295    538(29)       0.001203    117.3   531.3
   4.5305    440(26)       0.001481    117.3   512.6
   4.5315    493(28)       0.001312    117.3   495.6
   4.5325    482(27)       0.001346    117.3   480.0
   4.5335    481(27)       0.001343    117.3   465.8
   4.5345    475(27)       0.001358    117.3   452.8
   4.5355    380(24)       0.001711    117.3   440.8
   4.5365    370(24)       0.001752    117.3   429.8
   4.5375    391(25)       0.001656    117.3   419.6
   4.5385    405(25)       0.001598    117.3   410.2
   4.5395    422(26)       0.001533    117.3   401.5
   4.5405    389(25)       0.001658    117.3   393.4
   4.5415    390(25)       0.001649    117.3   385.9
   4.5425    389(25)       0.001651    117.3   378.8
   4.5435    339(23)       0.001896    117.4   372.3
   4.5445    330(23)       0.001959    117.4   366.2
   4.5455    315(22)       0.002050    117.4   360.5
   4.5465    334(23)       0.001933    117.4   355.1
   4.5475    337(23)       0.001903    117.4   350.1
   4.5485    373(24)       0.001728    117.4   345.3
   4.5495    314(22)       0.002051    117.4   340.9
   4.5505    343(23)       0.001874    117.4   336.7
   4.5515    335(23)       0.001923    117.4   332.8
   4.5525    365(24)       0.001764    117.4   329.0
   4.5535    337(23)       0.001916    117.4   325.5
   4.5545    320(22)       0.002027    117.4   322.2
   4.5555    316(22)       0.002062    117.4   319.0
   4.5565    320(22)       0.002016    117.4   316.1
   4.5575    342(23)       0.001882    117.4   313.2
   4.5585    335(23)       0.001924    117.4   310.5
   4.5595    284(21)       0.002272    117.4   308.1
   4.5605    303(22)       0.002135    117.4   305.7
   4.5615    319(22)       0.002022    117.4   303.4
   4.5625    316(22)       0.002043    117.4   301.2
   4.5635    332(23)       0.001932    117.4   299.2
   4.5645    304(22)       0.002118    117.4   297.2
   4.5655    328(23)       0.001965    117.5   295.3
   4.5665    309(22)       0.002087    117.5   293.5
   4.5675    307(22)       0.002106    117.5   291.7
   4.5685    288(21)       0.002247    117.5   290.1
   4.5695    336(23)       0.001924    117.5   288.5
   4.5705    298(22)       0.002155    117.5   287.0
   4.5715    290(21)       0.002243    117.5   285.6
   4.5725    288(21)       0.002234    117.5   284.2
   4.5735    306(22)       0.002103    117.5   282.8
   4.5745    311(22)       0.002066    117.5   281.6
   4.5755    292(21)       0.002213    117.5   280.4
   4.5765    309(22)       0.002101    117.5   279.2
   4.5775    248(20)       0.002601    117.5   278.1
   4.5785    297(21)       0.002167    117.5   277.0
   4.5795    302(22)       0.002122    117.5   276.0
   4.5805    281(21)       0.002295    117.5   232.7
   4.5815    273(21)       0.002369    117.5   232.7
   4.5825    283(21)       0.002283    117.5   232.8
   4.5835    301(22)       0.002138    117.5   232.9
   4.5845    274(21)       0.002357    117.5   232.9
   4.5855    282(21)       0.002272    117.5   233.0
   4.5865    282(21)       0.002272    117.5   233.1
   4.5875    302(22)       0.002141    117.6   233.1
   4.5885    260(20)       0.002479    117.6   233.2
   4.5895    257(20)       0.002514    117.6   233.3
   4.5905    298(21)       0.002180    117.6   233.4
   4.5915    293(21)       0.002208    117.6   233.4
   4.5925    316(22)       0.002054    117.6   233.5
   4.5935    268(20)       0.002390    117.6   233.6
   4.5945    266(20)       0.002430    117.6   233.7
   4.5955    252(20)       0.002560    117.6   233.8
   4.5965    269(20)       0.002401    117.6   233.9
   4.5975    253(20)       0.002555    117.6   233.9
   4.5985    256(20)       0.002514    117.6   234.0
   4.5995    247(19)       0.002633    117.6   234.1
   4.6005    273(20)       0.002384    117.6   234.2
   4.6015    263(20)       0.002460    117.6   234.3
   4.6025    238(19)       0.002719    117.6   234.4
   4.6035    254(20)       0.002553    117.6   234.5
   4.6045    269(20)       0.002392    117.6   234.7
   4.6055    247(20)       0.002617    117.6   234.8
   4.6065    241(19)       0.002691    117.6   234.9
   4.6075    252(20)       0.002558    117.6   235.0
   4.6085    245(19)       0.002641    117.6   235.2
   4.6095    259(20)       0.002510    117.7   235.4
   4.6105    237(19)       0.002757    117.7   235.5
   4.6115    251(20)       0.002579    117.7   235.7
   4.6125    255(20)       0.002538    117.7   235.9
   4.6135    244(19)       0.002647    117.7   236.1
   4.6145    238(19)       0.002728    117.7   236.4
   4.6155    216(18)       0.002985    117.7   236.7
   4.6165    217(18)       0.002983    117.7   237.0
   4.6175    210(18)       0.003087    117.7   237.4
   4.6185    256(20)       0.002525    117.7   237.8
   4.6195    250(20)       0.002602    117.7   238.3
   4.6205    215(18)       0.003013    117.7   238.9
   4.6215    218(18)       0.002972    117.7   239.7
   4.6225    262(20)       0.002467    117.7   240.7
   4.6235    255(20)       0.002548    117.7   242.1
   4.6245    225(19)       0.002905    117.7   244.3
   4.6255    263(20)       0.002448    117.7   248.1
   4.6265    272(21)       0.002365    117.7   255.1
   4.6275    236(19)       0.002729    117.7   267.3
   4.6285    251(20)       0.002570    117.7   287.5
   4.6295    277(21)       0.002349    117.7   317.4
   4.6305    319(22)       0.002038    117.7   356.8
   4.6315    372(24)       0.001745    117.7   401.5
   4.6325    402(25)       0.001601    117.8   442.9
   4.6335    448(26)       0.001440    117.8   468.3
   4.6345    394(25)       0.001646    117.8   466.9
   4.6355    444(26)       0.001461    117.8   439.4
   4.6365    365(24)       0.001764    117.8   397.2
   4.6375    323(22)       0.001994    117.8   352.8
   4.6385    278(21)       0.002307    117.8   314.3
   4.6395    250(20)       0.002583    117.8   285.5
   4.6405    277(21)       0.002327    117.8   266.4
   4.6415    244(19)       0.002637    117.8   254.9
   4.6425    267(20)       0.002420    117.8   248.5
   4.6435    241(19)       0.002702    117.8   245.0
   4.6445    230(19)       0.002807    117.8   243.0
   4.6455    236(19)       0.002732    117.8   241.7
   4.6465    241(19)       0.002678    117.8   240.9
   4.6475    266(20)       0.002430    117.8   240.2
   4.6485    232(19)       0.002805    117.8   239.7
   4.6495    231(19)       0.002801    117.8   239.3
   4.6505    245(20)       0.002623    117.8   239.0
   4.6515    217(18)       0.002969    117.8   238.7
   4.6525    237(19)       0.002713    117.8   238.5
   4.6535    247(20)       0.002613    117.8   238.3
   4.6545    238(19)       0.002720    117.9   238.2
   4.6555    257(20)       0.002515    117.9   238.1
   4.6565    226(19)       0.002882    117.9   238.0
   4.6575    223(19)       0.002913    117.9   237.9
   4.6585    223(19)       0.002911    117.9   237.8
   4.6595    223(19)       0.002917    117.9   237.8
   4.6605    240(19)       0.002693    117.9   237.7
   4.6615    215(18)       0.002985    117.9   237.7
   4.6625    222(19)       0.002890    117.9   237.7
   4.6635    198(18)       0.003263    117.9   237.6
   4.6645    264(20)       0.002474    117.9   237.6
   4.6655    268(20)       0.002408    117.9   237.6
   4.6665    236(19)       0.002737    117.9   237.6
   4.6675    222(19)       0.002909    117.9   237.6
   4.6685    268(20)       0.002414    117.9   237.6
   4.6695    257(20)       0.002521    117.9   237.6
   4.6705    250(20)       0.002594    117.9   237.6
   4.6715    239(19)       0.002707    117.9   237.6
   4.6725    227(19)       0.002849    117.9   237.7
   4.6735    218(18)       0.002985    117.9   237.7
   4.6745    248(20)       0.002614    117.9   237.7
   4.6755    226(19)       0.002866    117.9   237.7
   4.6765    248(20)       0.002610    117.9   237.7
   4.6775    249(20)       0.002592    118.0   237.8
   4.6785    228(19)       0.002834    118.0   237.8
   4.6795    251(20)       0.002593    118.0   237.8
   4.6805    248(20)       0.002598    118.0   237.8
   4.6815    273(21)       0.002362    118.0   237.9
   4.6825    221(18)       0.002932    118.0   237.9
   4.6835    212(18)       0.003064    118.0   237.9
   4.6845    257(20)       0.002508    118.0   238.0
   4.6855    246(20)       0.002620    118.0   238.0
   4.6865    223(19)       0.002902    118.0   238.0
   4.6875    257(20)       0.002520    118.0   238.1
   4.6885    262(20)       0.002457    118.0   238.1
   4.6895    259(20)       0.002487    118.0   238.1
   4.6905    252(20)       0.002548    118.0   238.2
   4.6915    229(19)       0.002851    118.0   238.2
   4.6925    239(19)       0.002730    118.0   238.2
   4.6935    284(21)       0.002279    118.0   238.3
   4.6945    255(20)       0.002545    118.0   238.3
   4.6955    250(20)       0.002588    118.0   238.3
   4.6965    235(19)       0.002736    118.0   238.4
   4.6975    209(18)       0.003104    118.0   238.4
   4.6985    227(19)       0.002828    118.0   238.4
   4.6995    228(19)       0.002843    118.1   238.5
   4.7005    241(19)       0.002692    118.1   238.5
   4.7015    227(19)       0.002870    118.1   238.6
   4.7025    247(20)       0.002601    118.1   238.6
   4.7035    210(18)       0.003084    118.1   238.6
   4.7045    224(19)       0.002893    118.1   238.7
   4.7055    221(18)       0.002933    118.1   238.7
   4.7065    252(20)       0.002589    118.1   238.7
   4.7075    239(19)       0.002712    118.1   238.8
   4.7085    223(19)       0.002890    118.1   238.8
   4.7095    221(18)       0.002926    118.1   238.9
   4.7105    263(20)       0.002456    118.1   238.9
   4.7115    234(19)       0.002788    118.1   238.9
   4.7125    225(19)       0.002890    118.1   239.0
   4.7135    237(19)       0.002729    118.1   239.0
   4.7145    235(19)       0.002744    118.1   239.0
   4.7155    249(20)       0.002586    118.1   239.0
   4.7165    231(19)       0.002781    118.1   239.0
   4.7175    226(19)       0.002841    118.1   239.0
   4.7185    245(19)       0.002642    118.1   239.1
   4.7195    254(20)       0.002551    118.1   239.1
   4.7205    252(20)       0.002545    118.1   239.2
   4.7215    257(20)       0.002513    118.1   239.2
   4.7225    238(19)       0.002711    118.2   239.2
   4.7235    229(19)       0.002812    118.2   239.3
   4.7245    234(19)       0.002768    118.2   239.3
   4.7255    238(19)       0.002690    118.2   239.3
   4.7265    246(20)       0.002614    118.2   239.4
   4.7275    221(18)       0.002937    118.2   239.4
   4.7285    266(20)       0.002437    118.2   239.5
   4.7295    243(19)       0.002685    118.2   239.5
   4.7305    219(18)       0.002925    118.2   239.5
   4.7315    240(19)       0.002683    118.2   239.6
   4.7325    254(20)       0.002540    118.2   239.6
   4.7335    254(20)       0.002564    118.2   239.7
   4.7345    240(19)       0.002694    118.2   239.7
   4.7355    230(19)       0.002833    118.2   239.7
   4.7365    229(19)       0.002830    118.2   239.8
   4.7375    222(19)       0.002892    118.2   239.8
   4.7385    227(19)       0.002827    118.2   239.8
   4.7395    267(20)       0.002407    118.2   239.9
   4.7405    268(20)       0.002405    118.2   239.9
   4.7415    245(19)       0.002639    118.2   240.0
   4.7425    220(18)       0.002949    118.2   240.0
   4.7435    245(19)       0.002639    118.2   240.0
   4.7445    264(20)       0.002441    118.3   240.1
   4.7455    241(19)       0.002673    118.3   240.1
   4.7465    226(19)       0.002846    118.3   240.1
   4.7475    233(19)       0.002771    118.3   240.2
   4.7485    243(19)       0.002637    118.3   240.2
   4.7495    251(20)       0.002581    118.3   240.3
   4.7505    227(19)       0.002860    118.3   240.3
   4.7515    253(20)       0.002545    118.3   240.3
   4.7525    230(19)       0.002790    118.3   240.4
   4.7535    218(18)       0.002979    118.3   240.4
   4.7545    243(19)       0.002653    118.3   240.4
   4.7555    243(19)       0.002651    118.3   245.9
   4.7565    224(19)       0.002891    118.3   246.1
   4.7575    240(19)       0.002682    118.3   246.2
   4.7585    225(19)       0.002868    118.3   246.4
   4.7595    229(19)       0.002826    118.3   246.6
   4.7605    242(19)       0.002651    118.3   246.9
   4.7615    232(19)       0.002792    118.3   248.9
   4.7625    244(19)       0.002648    118.3   249.1
   4.7635    278(21)       0.002319    118.3   249.4
   4.7645    261(20)       0.002469    118.3   249.7
   4.7655    259(20)       0.002514    118.3   250.0
   4.7665    247(19)       0.002632    118.3   250.4
   4.7675    261(20)       0.002468    118.4   250.7
   4.7685    267(20)       0.002412    118.4   251.0
   4.7695    270(20)       0.002392    118.4   251.4
   4.7705    210(18)       0.003070    118.4   251.8
   4.7715    246(19)       0.002639    118.4   252.2
   4.7725    231(19)       0.002808    118.4   252.6
   4.7735    236(19)       0.002710    118.4   253.1
   4.7745    250(20)       0.002593    118.4   253.5
   4.7755    211(18)       0.003056    118.4   254.0
   4.7765    266(20)       0.002415    118.4   254.5
   4.7775    238(19)       0.002704    118.4   255.1
   4.7785    246(20)       0.002622    118.4   255.6
   4.7795    246(19)       0.002630    118.4   256.2
   4.7805    260(20)       0.002494    118.4   256.8
   4.7815    239(19)       0.002727    118.4   257.5
   4.7825    240(19)       0.002697    118.4   258.2
   4.7835    271(21)       0.002375    118.4   259.0
   4.7845    249(20)       0.002595    118.4   259.8
   4.7855    265(20)       0.002444    118.4   260.6
   4.7865    232(19)       0.002803    118.4   261.5
   4.7875    261(20)       0.002480    118.4   262.5
   4.7885    241(19)       0.002696    118.4   263.5
   4.7895    259(20)       0.002501    118.4   264.6
   4.7905    256(20)       0.002539    118.5   265.8
   4.7915    240(19)       0.002686    118.5   267.1
   4.7925    258(20)       0.002502    118.5   268.5
   4.7935    257(20)       0.002517    118.5   270.0
   4.7945    268(20)       0.002418    118.5   271.6
   4.7955    282(21)       0.002300    118.5   273.3
   4.7965    248(19)       0.002640    118.5   275.2
   4.7975    286(21)       0.002274    118.5   277.3
   4.7985    259(20)       0.002506    118.5   279.5
   4.7995    261(20)       0.002471    118.5   282.0
   4.8005    269(20)       0.002401    118.5   284.7
   4.8015    275(21)       0.002342    118.5   287.7
   4.8025    265(20)       0.002451    118.5   291.0
   4.8035    281(21)       0.002295    118.5   294.7
   4.8045    257(20)       0.002538    118.5   298.8
   4.8055    320(22)       0.002026    118.5   303.4
   4.8065    313(22)       0.002073    118.5   308.6
   4.8075    325(22)       0.001987    118.5   314.4
   4.8085    366(24)       0.001777    118.5   321.1
   4.8095    328(22)       0.001976    118.5   328.7
   4.8105    350(23)       0.001851    118.5   337.4
   4.8115    324(22)       0.001993    118.5   347.5
   4.8125    350(23)       0.001839    118.5   359.3
   4.8135    368(24)       0.001748    118.6   373.1
   4.8145    360(24)       0.001802    118.6   389.6
   4.8155    448(26)       0.001443    118.6   409.5
   4.8165    407(25)       0.001592    118.6   434.1
   4.8175    459(27)       0.001417    118.6   465.9
   4.8185    495(28)       0.001307    118.6   510.3
   4.8195    560(29)       0.001152    118.6   578.1
   4.8205    647(32)       0.000996    118.6   690.8
   4.8215    795(35)       0.000815    118.6   885.7
   4.8225    1047(40)      0.000617    119.    1218.
   4.8235    1378(46)      0.000475    119.    1755.
   4.8245    2107(57)      0.0003092   119.    2553.
   4.8255    2916(67)      0.0002232   119.    3625.
   4.8265    4264(81)      0.0001528   119.    4901.
   4.8275    5949(96)      0.0001088   119.    6206.
   4.8285    7370(110)     0.0000876   119.    7253.
   4.8295    8250(110)     0.0000782   119.    7736.
   4.8305    8070(110)     0.0000798   119.    7553.
   4.8315    6880(100)     0.0000938   119.    6924.
   4.8325    5650(94)      0.0001142   119.    6182.
   4.8335    4949(88)      0.0001305   119.    5536.
   4.8345    4496(83)      0.0001438   119.    5016.
   4.8355    4399(83)      0.0001468   119.    4506.
   4.8365    4086(80)      0.0001580   119.    3882.
   4.8375    3266(71)      0.0001983   119.    3153.
   4.8385    2401(61)      0.0002709   119.    2420.
   4.8395    1631(50)      0.000400    119.    1779.
   4.8405    1101(41)      0.000591    119.    1279.
   4.8415    843(36)       0.000768    119.    930.
   4.8425    649(32)       0.000999    118.7   707.2
   4.8435    550(29)       0.001181    118.7   574.0
   4.8445    515(28)       0.001259    118.7   496.0
   4.8455    473(27)       0.001363    118.7   448.6
   4.8465    411(25)       0.001574    118.7   417.3
   4.8475    424(26)       0.001531    118.7   394.5
   4.8485    380(24)       0.001705    118.7   376.7
   4.8495    366(24)       0.001767    118.7   362.0
   4.8505    320(22)       0.002030    118.7   349.8
   4.8515    323(22)       0.002009    118.7   339.3
   4.8525    310(22)       0.002081    118.7   330.4
   4.8535    292(21)       0.002207    118.7   322.7
   4.8545    310(22)       0.002084    118.7   315.9
   4.8555    315(22)       0.002053    118.7   310.1
   4.8565    290(21)       0.002221    118.7   304.9
   4.8575    258(20)       0.002513    118.7   300.2
   4.8585    241(19)       0.002705    118.8   296.1
   4.8595    271(20)       0.002392    118.8   292.5
   4.8605    270(20)       0.002398    118.8   289.2
   4.8615    283(21)       0.002288    118.8   286.2
   4.8625    301(22)       0.002139    118.8   283.6
   4.8635    278(21)       0.002332    118.8   281.1
   4.8645    286(21)       0.002270    118.8   278.9
   4.8655    306(22)       0.002117    118.8   276.9
   4.8665    292(21)       0.002227    118.8   275.1
   4.8675    265(20)       0.002459    118.8   273.4
   4.8685    281(21)       0.002294    118.8   271.8
   4.8695    294(21)       0.002197    118.8   270.4
   4.8705    276(21)       0.002344    118.8   269.1
   4.8715    292(21)       0.002204    118.8   267.8
   4.8725    260(20)       0.002478    118.8   266.7
   4.8735    266(20)       0.002425    118.8   265.6
   4.8745    268(20)       0.002407    118.8   264.7
   4.8755    264(20)       0.002440    118.8   263.7
   4.8765    248(20)       0.002609    118.8   262.9
   4.8775    291(21)       0.002233    118.8   262.1
   4.8785    281(21)       0.002313    118.8   261.4
   4.8795    250(20)       0.002596    118.8   260.7
   4.8805    261(20)       0.002481    118.8   260.0
   4.8815    267(20)       0.002426    118.9   259.4
   4.8825    246(20)       0.002618    118.9   258.8
   4.8835    256(20)       0.002512    118.9   258.3
   4.8845    257(20)       0.002512    118.9   257.7
   4.8855    257(20)       0.002529    118.9   257.3
   4.8865    294(21)       0.002208    118.9   256.8
   4.8875    321(22)       0.002016    118.9   256.4
   4.8885    262(20)       0.002478    118.9   256.0
   4.8895    240(19)       0.002698    118.9   255.6
   4.8905    252(20)       0.002569    118.9   255.2
   4.8915    255(20)       0.002522    118.9   254.9
   4.8925    261(20)       0.002472    118.9   254.5
   4.8935    282(21)       0.002280    118.9   254.2
   4.8945    257(20)       0.002513    118.9   253.9
   4.8955    243(19)       0.002662    118.9   253.6
   4.8965    252(20)       0.002554    118.9   253.4
   4.8975    264(20)       0.002440    118.9   253.1
   4.8985    256(20)       0.002539    118.9   252.9
   4.8995    263(20)       0.002460    118.9   252.6
   4.9005    277(21)       0.002316    118.9   252.4
   4.9015    275(21)       0.002336    118.9   252.2
   4.9025    268(20)       0.002407    118.9   252.0
   4.9035    252(20)       0.002568    118.9   251.8
   4.9045    254(20)       0.002558    119.0   251.6
   4.9055    265(20)       0.002448    119.0   251.4
   4.9065    246(20)       0.002622    119.0   251.3
   4.9075    269(20)       0.002409    119.0   251.1
   4.9085    261(20)       0.002490    119.0   250.9
   4.9095    264(20)       0.002457    119.0   250.8
   4.9105    248(20)       0.002617    119.0   246.1
   4.9115    249(20)       0.002609    119.0   246.1
   4.9125    243(19)       0.002652    119.0   246.1
   4.9135    241(19)       0.002702    119.0   246.1
   4.9145    272(20)       0.002388    119.0   246.0
   4.9155    273(21)       0.002372    119.0   246.0
   4.9165    264(20)       0.002442    119.0   244.5
   4.9175    243(19)       0.002658    119.0   244.5
   4.9185    262(20)       0.002467    119.0   244.5
   4.9195    264(20)       0.002450    119.0   244.5
   4.9205    252(20)       0.002573    119.0   244.5
   4.9215    272(21)       0.002372    119.0   244.6
   4.9225    277(21)       0.002328    119.0   244.6
   4.9235    277(21)       0.002346    119.0   244.6
   4.9245    285(21)       0.002284    119.0   244.6
   4.9255    291(21)       0.002223    119.0   244.6
   4.9265    281(21)       0.002307    119.0   244.6
   4.9275    267(20)       0.002428    119.0   244.6
   4.9285    276(21)       0.002343    119.1   244.6
   4.9295    263(20)       0.002460    119.1   244.7
   4.9305    265(20)       0.002442    119.1   244.7
   4.9315    283(21)       0.002291    119.1   244.7
   4.9325    272(21)       0.002376    119.1   244.7
   4.9335    274(21)       0.002375    119.1   244.7
   4.9345    249(20)       0.002613    119.1   244.7
   4.9355    263(20)       0.002446    119.1   244.7
   4.9365    265(20)       0.002432    119.1   244.7
   4.9375    256(20)       0.002521    119.1   244.8
   4.9385    251(20)       0.002566    119.1   244.8
   4.9395    262(20)       0.002463    119.1   244.8
   4.9405    254(20)       0.002553    119.1   244.8
   4.9415    237(19)       0.002730    119.1   244.8
   4.9425    267(20)       0.002408    119.1   244.8
   4.9435    275(21)       0.002347    119.1   244.8
   4.9445    270(20)       0.002405    119.1   244.8
   4.9455    266(20)       0.002436    119.1   244.9
   4.9465    269(20)       0.002392    119.1   244.9
   4.9475    263(20)       0.002443    119.1   244.9
   4.9485    275(21)       0.002349    119.1   244.9
   4.9495    259(20)       0.002498    119.1   244.9
   4.9505    268(20)       0.002408    119.1   244.9
   4.9515    279(21)       0.002332    119.2   244.9
   4.9525    235(19)       0.002762    119.2   244.9
   4.9535    263(20)       0.002452    119.2   244.9
   4.9545    262(20)       0.002481    119.2   244.9
   4.9555    257(20)       0.002531    119.2   245.0
   4.9565    266(20)       0.002420    119.2   245.0
   4.9575    271(20)       0.002389    119.2   245.0
   4.9585    262(20)       0.002470    119.2   245.0
   4.9595    268(20)       0.002423    119.2   245.0
   4.9605    280(21)       0.002316    119.2   245.0
   4.9615    280(21)       0.002312    119.2   245.0
   4.9625    286(21)       0.002237    119.2   245.0
   4.9635    272(21)       0.002376    119.2   245.0
   4.9645    273(21)       0.002373    119.2   245.0
   4.9655    251(20)       0.002568    119.2   245.0
   4.9665    272(21)       0.002379    119.2   245.0
   4.9675    292(21)       0.002202    119.2   245.1
   4.9685    304(22)       0.002121    119.2   245.1
   4.9695    296(21)       0.002204    119.2   245.1
   4.9705    272(20)       0.002384    119.2   245.1
   4.9715    284(21)       0.002284    119.2   245.1
   4.9725    267(20)       0.002433    119.2   245.1
   4.9735    255(20)       0.002543    119.2   245.1
   4.9745    264(20)       0.002441    119.3   245.1
   4.9755    250(20)       0.002591    119.3   245.1
   4.9765    254(20)       0.002559    119.3   245.1
   4.9775    244(19)       0.002651    119.3   245.1
   4.9785    263(20)       0.002467    119.3   245.1
   4.9795    273(21)       0.002375    119.3   245.1
   4.9805    257(20)       0.002505    119.3   245.2
   4.9815    252(20)       0.002548    119.3   245.2
   4.9825    267(20)       0.002431    119.3   245.2
   4.9835    277(21)       0.002343    119.3   245.2
   4.9845    291(21)       0.002223    119.3   245.2
   4.9855    280(21)       0.002303    119.3   245.2
   4.9865    272(21)       0.002363    119.3   245.2
   4.9875    271(21)       0.002374    119.3   245.2
   4.9885    263(20)       0.002444    119.3   245.2
   4.9895    240(19)       0.002701    119.3   245.2
   4.9905    237(19)       0.002733    119.3   245.2
   4.9915    268(20)       0.002408    119.3   245.2
   4.9925    255(20)       0.002526    119.3   245.2
   4.9935    261(20)       0.002468    119.3   245.2
   4.9945    286(21)       0.002276    119.3   245.2
   4.9955    240(19)       0.002679    119.3   245.2
   4.9965    254(20)       0.002557    119.3   245.2
   4.9975    271(21)       0.002378    119.4   245.2
   4.9985    274(21)       0.002356    119.4   245.2
   4.9995    263(20)       0.002454    119.4   245.2
   5.0005    291(21)       0.002220    119.4   245.3
   5.0015    271(20)       0.002395    119.4   245.3
   5.0025    267(20)       0.002441    119.4   245.3
   5.0035    283(21)       0.002276    119.4   245.3
   5.0045    265(20)       0.002429    119.4   245.3
   5.0055    275(21)       0.002353    119.4   245.3
   5.0065    270(20)       0.002386    119.4   245.3
   5.0075    235(19)       0.002763    119.4   245.3
   5.0085    262(20)       0.002494    119.4   245.3
   5.0095    264(20)       0.002430    119.4   245.3
   5.0105    287(21)       0.002267    119.4   245.3
   5.0115    278(21)       0.002323    119.4   245.3
   5.0125    281(21)       0.002303    119.4   245.3
   5.0135    275(21)       0.002358    119.4   245.3
   5.0145    262(20)       0.002482    119.4   245.3
   5.0155    279(21)       0.002329    119.4   245.3
   5.0165    264(20)       0.002445    119.4   245.3
   5.0175    259(20)       0.002489    119.4   245.3
   5.0185    272(21)       0.002369    119.4   245.3
   5.0195    263(20)       0.002468    119.4   245.3
   5.0205    256(20)       0.002510    119.5   245.3
   5.0215    257(20)       0.002507    119.5   245.3
   5.0225    269(20)       0.002422    119.5   245.3
   5.0235    262(20)       0.002467    119.5   245.3
   5.0245    245(19)       0.002633    119.5   245.3
   5.0255    266(20)       0.002425    119.5   245.3
   5.0265    273(21)       0.002356    119.5   245.3
   5.0275    250(20)       0.002563    119.5   245.3
   5.0285    246(19)       0.002633    119.5   245.3
   5.0295    247(20)       0.002620    119.5   245.3
   5.0305    265(20)       0.002430    119.5   245.3
   5.0315    272(21)       0.002360    119.5   245.3
   5.0325    272(21)       0.002374    119.5   245.3
   5.0335    268(20)       0.002413    119.5   245.3
   5.0345    260(20)       0.002479    119.5   245.3
   5.0355    257(20)       0.002509    119.5   245.3
   5.0365    277(21)       0.002336    119.5   245.3
   5.0375    281(21)       0.002292    119.5   245.3
   5.0385    296(21)       0.002195    119.5   245.3
   5.0395    283(21)       0.002295    119.5   245.3
   5.0405    268(20)       0.002419    119.5   245.3
   5.0415    280(21)       0.002293    119.5   245.3
   5.0425    286(21)       0.002261    119.5   245.3
   5.0435    293(21)       0.002207    119.5   245.3
   5.0445    276(21)       0.002347    119.6   245.3
   5.0455    261(20)       0.002487    119.6   245.3
   5.0465    270(20)       0.002403    119.6   245.3
   5.0475    302(22)       0.002148    119.6   245.3
   5.0485    281(21)       0.002315    119.6   245.3
   5.0495    261(20)       0.002475    119.6   245.3
   5.0505    271(20)       0.002395    119.6   245.3
   5.0515    280(21)       0.002314    119.6   245.3
   5.0525    267(20)       0.002409    119.6   245.3
   5.0535    277(21)       0.002329    119.6   245.3
   5.0545    297(21)       0.002185    119.6   245.3
   5.0555    282(21)       0.002287    119.6   245.3
   5.0565    280(21)       0.002304    119.6   245.3
   5.0575    282(21)       0.002285    119.6   245.3
   5.0585    288(21)       0.002246    119.6   245.3
   5.0595    229(19)       0.002856    119.6   245.3
   5.0605    234(19)       0.002786    119.6   245.3
   5.0615    263(20)       0.002478    119.6   245.3
   5.0625    259(20)       0.002504    119.6   245.3
   5.0635    273(21)       0.002372    119.6   245.3
   5.0645    257(20)       0.002513    119.6   245.3
   5.0655    290(21)       0.002222    119.6   245.2
   5.0665    272(20)       0.002398    119.6   245.2
   5.0675    261(20)       0.002500    119.7   245.2
   5.0685    282(21)       0.002302    119.7   245.2
   5.0695    283(21)       0.002288    119.7   245.2
   5.0705    299(21)       0.002178    119.7   245.2
   5.0715    293(21)       0.002217    119.7   245.2
   5.0725    293(21)       0.002218    119.7   245.2
   5.0735    283(21)       0.002274    119.7   245.2
   5.0745    266(20)       0.002436    119.7   245.2
   5.0755    277(21)       0.002336    119.7   245.2
   5.0765    305(22)       0.002122    119.7   245.2
   5.0775    276(21)       0.002342    119.7   245.2
   5.0785    248(19)       0.002630    119.7   245.2
   5.0795    236(19)       0.002759    119.7   245.2
   5.0805    269(20)       0.002414    119.7   245.2
   5.0815    289(21)       0.002238    119.7   245.2
   5.0825    278(21)       0.002325    119.7   245.2
   5.0835    274(21)       0.002373    119.7   245.2
   5.0845    281(21)       0.002336    119.7   245.2
   5.0855    292(21)       0.002229    119.7   245.1
   5.0865    280(21)       0.002316    119.7   245.1
   5.0875    285(21)       0.002258    119.7   245.1
   5.0885    258(20)       0.002526    119.7   245.1
   5.0895    260(20)       0.002494    119.7   245.1
   5.0905    259(20)       0.002501    119.7   245.1
   5.0915    273(21)       0.002364    119.8   245.1
   5.0925    291(21)       0.002226    119.8   245.1
   5.0935    282(21)       0.002295    119.8   245.1
   5.0945    284(21)       0.002293    119.8   245.1
   5.0955    256(20)       0.002540    119.8   245.1
   5.0965    263(20)       0.002456    119.8   245.1
   5.0975    275(21)       0.002347    119.8   245.1
   5.0985    294(21)       0.002201    119.8   245.1
   5.0995    275(21)       0.002359    119.8   245.0
   5.1005    293(21)       0.002221    119.8   245.0
   5.1015    311(22)       0.002083    119.8   245.0
   5.1025    273(21)       0.002374    119.8   245.0
   5.1035    278(21)       0.002345    119.8   245.0
   5.1045    264(20)       0.002458    119.8   245.0
   5.1055    256(20)       0.002536    119.8   245.0
   5.1065    258(20)       0.002503    119.8   245.0
   5.1075    280(21)       0.002307    119.8   245.0
   5.1085    273(21)       0.002362    119.8   245.0
   5.1095    250(20)       0.002572    119.8   245.0
   5.1105    248(20)       0.002609    119.8   244.9
   5.1115    259(20)       0.002499    119.8   244.9
   5.1125    268(20)       0.002404    119.8   244.9
   5.1135    269(20)       0.002414    119.8   244.9
   5.1145    270(20)       0.002402    119.9   244.9
   5.1155    258(20)       0.002508    119.9   244.9
   5.1165    266(20)       0.002418    119.9   244.9
   5.1174    268(20)       0.002413    119.9   244.9
   5.1185    252(20)       0.002545    119.9   244.9
   5.1195    271(20)       0.002386    119.9   244.9
   5.1205    282(21)       0.002303    119.9   244.9
   5.1214    279(21)       0.002318    119.9   244.8
   5.1224    272(21)       0.002362    119.9   244.8
   5.1234    283(21)       0.002271    119.9   244.8
   5.1244    272(21)       0.002377    119.9   244.8
   5.1254    251(20)       0.002559    119.9   244.8
   5.1264    274(21)       0.002373    119.9   244.8
   5.1274    275(21)       0.002356    119.9   244.8
   5.1284    288(21)       0.002236    119.9   244.8
   5.1294    274(20)       0.002387    119.9   244.8
   5.1304    258(20)       0.002518    119.9   244.7
   5.1314    272(20)       0.002383    119.9   244.7
   5.1324    283(21)       0.002291    119.9   244.7
   5.1334    279(21)       0.002309    119.9   244.7
   5.1344    273(21)       0.002354    119.9   244.7
   5.1354    287(21)       0.002245    119.9   244.7
   5.1364    311(22)       0.002059    119.9   244.7
   5.1374    278(21)       0.002329    119.9   244.7
   5.1384    277(21)       0.002336    120.0   244.6
   5.1394    286(21)       0.002263    120.0   244.6
   5.1404    291(21)       0.002218    120.0   244.6
   5.1414    302(22)       0.002131    120.0   244.6
   5.1424    278(21)       0.002342    120.0   244.6
   5.1434    245(19)       0.002655    120.0   244.6
   5.1444    276(21)       0.002353    120.0   244.6
   5.1454    277(21)       0.002316    120.0   244.6
   5.1464    274(21)       0.002353    120.0   244.5
   5.1474    260(20)       0.002482    120.0   244.5
   5.1484    261(20)       0.002454    120.0   244.5
   5.1494    255(20)       0.002525    120.0   244.5
   5.1504    287(21)       0.002244    120.0   244.5
   5.1514    318(22)       0.002063    120.0   244.5
   5.1524    290(21)       0.002244    120.0   244.5
   5.1534    288(21)       0.002241    120.0   244.4
   5.1544    288(21)       0.002251    120.0   244.4
   5.1554    269(20)       0.002399    120.0   244.4
   5.1564    242(19)       0.002687    120.0   244.4
   5.1574    270(20)       0.002413    120.0   244.4
   5.1584    266(20)       0.002432    120.0   244.4
   5.1594    274(21)       0.002362    120.0   244.4
   5.1604    303(22)       0.002138    120.0   244.3
   5.1614    297(21)       0.002173    120.0   244.3
   5.1624    285(21)       0.002275    120.1   244.3
   5.1634    281(21)       0.002338    120.1   244.3
   5.1644    253(20)       0.002565    120.1   244.3
   5.1654    261(20)       0.002472    120.1   244.3
   5.1664    274(21)       0.002353    120.1   244.3
   5.1674    282(21)       0.002303    120.1   244.2
   5.1684    296(21)       0.002193    120.1   244.2
   5.1694    290(21)       0.002231    120.1   244.2
   5.1704    286(21)       0.002271    120.1   244.2
   5.1714    282(21)       0.002291    120.1   244.2
   5.1724    284(21)       0.002278    120.1   244.2
   5.1734    263(20)       0.002444    120.1   244.1
   5.1744    267(20)       0.002414    120.1   244.1
   5.1754    272(21)       0.002375    120.1   244.1
   5.1764    277(21)       0.002342    120.1   244.1
   5.1774    283(21)       0.002280    120.1   244.1
   5.1784    292(21)       0.002218    120.1   244.1
   5.1794    307(22)       0.002113    120.1   244.0
   5.1804    255(20)       0.002580    120.1   244.0
   5.1814    246(19)       0.002644    120.1   244.0
   5.1824    236(19)       0.002761    120.1   244.0
   5.1834    285(21)       0.002298    120.1   244.0
   5.1844    294(21)       0.002210    120.1   244.0
   5.1854    283(21)       0.002308    120.2   243.9
   5.1864    298(21)       0.002179    120.2   243.9
   5.1874    257(20)       0.002506    120.2   243.9
   5.1884    288(21)       0.002256    120.2   243.9
   5.1894    277(21)       0.002350    120.2   243.9
   5.1904    274(21)       0.002371    120.2   243.9
   5.1914    277(21)       0.002333    120.2   243.8
   5.1924    269(20)       0.002393    120.2   243.8
   5.1934    277(21)       0.002337    120.2   243.8
   5.1944    274(21)       0.002367    120.2   243.8
   5.1954    244(19)       0.002650    120.2   243.8
   5.1964    271(20)       0.002385    120.2   243.7
   5.1974    287(21)       0.002266    120.2   243.7
   5.1984    265(20)       0.002443    120.2   243.7
   5.1994    289(21)       0.002247    120.2   243.7
   5.2004    309(22)       0.002095    120.2   243.7
   5.2014    275(21)       0.002350    120.2   243.6
   5.2024    286(21)       0.002264    120.2   243.6
   5.2034    295(21)       0.002189    120.2   243.6
   5.2044    300(22)       0.002152    120.2   243.6
   5.2054    310(22)       0.002089    120.2   243.6
   5.2064    293(21)       0.002207    120.2   243.6
   5.2074    258(20)       0.002516    120.2   243.5
   5.2084    250(20)       0.002606    120.2   243.5
   5.2094    269(20)       0.002400    120.3   269.9
   5.2104    295(21)       0.002187    120.3   270.6
   5.2114    250(20)       0.002621    120.3   271.4
   5.2124    248(20)       0.002622    120.3   272.1
   5.2134    286(21)       0.002283    120.3   273.0
   5.2144    257(20)       0.002526    120.3   273.8
   5.2154    286(21)       0.002275    120.3   274.7
   5.2164    256(20)       0.002538    120.3   275.6
   5.2174    277(21)       0.002338    120.3   276.6
   5.2184    285(21)       0.002268    120.3   277.6
   5.2194    298(21)       0.002164    120.3   278.7
   5.2204    299(22)       0.002161    120.3   279.8
   5.2214    279(21)       0.002320    120.3   281.0
   5.2224    277(21)       0.002311    120.3   282.2
   5.2234    262(20)       0.002453    120.3   283.5
   5.2244    271(20)       0.002383    120.3   284.9
   5.2254    266(20)       0.002413    120.3   286.4
   5.2264    282(21)       0.002288    120.3   287.9
   5.2274    285(21)       0.002253    120.3   289.5
   5.2284    256(20)       0.002505    120.3   291.2
   5.2294    267(20)       0.002409    120.3   293.0
   5.2304    267(20)       0.002395    120.3   294.9
   5.2314    256(20)       0.002520    120.3   296.9
   5.2324    288(21)       0.002244    120.3   299.1
   5.2334    304(22)       0.002117    120.4   301.3
   5.2344    299(21)       0.002167    120.4   303.7
   5.2354    317(22)       0.002040    120.4   306.3
   5.2364    325(22)       0.001988    120.4   309.0
   5.2374    339(23)       0.001906    120.4   312.0
   5.2384    334(23)       0.001936    120.4   315.1
   5.2394    314(22)       0.002049    120.4   318.4
   5.2404    332(23)       0.001935    120.4   322.0
   5.2414    358(24)       0.001793    120.4   325.8
   5.2424    336(23)       0.001920    120.4   330.0
   5.2434    314(22)       0.002067    120.4   334.4
   5.2444    328(22)       0.001980    120.4   339.2
   5.2454    361(24)       0.001790    120.4   344.4
   5.2464    345(23)       0.001883    120.4   350.1
   5.2474    357(23)       0.001821    120.4   356.2
   5.2484    341(23)       0.001894    120.4   362.8
   5.2494    365(24)       0.001764    120.4   370.1
   5.2504    382(24)       0.001688    120.4   378.0
   5.2514    392(25)       0.001638    120.4   386.7
   5.2524    402(25)       0.001604    120.4   396.2
   5.2534    412(25)       0.001567    120.4   406.8
   5.2544    420(25)       0.001540    120.4   418.4
   5.2554    411(25)       0.001566    120.4   431.4
   5.2564    449(26)       0.001434    120.4   445.8
   5.2574    486(27)       0.001329    120.5   462.0
   5.2584    504(28)       0.001281    120.5   480.1
   5.2594    497(28)       0.001307    120.5   500.6
   5.2604    495(28)       0.001310    120.5   523.8
   5.2614    524(28)       0.001231    120.5   554.9
   5.2624    567(30)       0.001142    120.5   585.3
   5.2634    579(30)       0.001118    120.5   620.4
   5.2644    616(31)       0.001051    120.5   661.2
   5.2654    646(32)       0.000999    120.5   708.9
   5.2664    678(32)       0.000951    120.5   765.2
   5.2674    735(34)       0.000882    120.5   832.2
   5.2684    904(37)       0.000718    120.    913.
   5.2694    1007(39)      0.000642    121.    1013.
   5.2704    1150(42)      0.000562    121.    1141.
   5.2714    1361(46)      0.000475    121.    1317.
   5.2724    1685(51)      0.000384    121.    1582.
   5.2734    2062(56)      0.0003149   121.    2023.
   5.2744    2713(65)      0.0002401   121.    2800.
   5.2754    3764(76)      0.0001727   121.    4170.
   5.2764    5389(91)      0.0001209   121.    6469.
   5.2774    8070(110)     0.0000809   121.    10036.
   5.2784    12480(140)    0.0000523   121.    15029.
   5.2794    18500(170)    0.0000352   121.    21204.
   5.2804    26100(200)    0.0000249   121.    27755.
   5.2814    33240(230)    0.0000194   121.    33225.
   5.2824    37600(240)    0.0000171   121.    35782.
   5.2834    37120(240)    0.0000174   121.    34308.
   5.2844    31620(220)    0.0000205   121.    29472.
   5.2854    23450(190)    0.0000277   121.    23052.
   5.2864    15680(160)    0.0000417   121.    16660.
   5.2874    10020(120)    0.0000652   121.    11294.
   5.2884    6580(100)     0.0000994   121.    7333.
   5.2894    4502(83)      0.0001452   121.    4709.
   5.2904    3247(71)      0.0002009   121.    3116.
   5.2914    2450(61)      0.0002660   121.    2205.
   5.2924    1987(55)      0.0003275   121.    1691.
   5.2934    1578(49)      0.000413    121.    1389.
   5.2944    1311(45)      0.000497    121.    1195.
   5.2954    1136(42)      0.000573    121.    1057.
   5.2964    1009(39)      0.000644    121.    951.
   5.2974    941(38)       0.000690    121.    867.
   5.2984    822(36)       0.000792    121.    798.
   5.2994    698(33)       0.000932    120.6   739.8
   5.3004    653(32)       0.000991    120.6   691.3
   5.3014    634(31)       0.001024    120.6   650.2
   5.3024    627(31)       0.001035    120.6   615.2
   5.3034    596(30)       0.001088    120.6   585.3
   5.3044    578(30)       0.001125    120.6   559.6
   5.3054    517(28)       0.001254    120.7   548.7
   5.3064    503(28)       0.001284    120.7   529.9
   5.3074    491(28)       0.001319    120.7   513.9
   5.3084    489(27)       0.001324    120.7   500.3
   5.3094    521(28)       0.001245    120.7   488.8
   5.3104    505(28)       0.001287    120.7   479.1
   5.3114    460(27)       0.001411    120.7   471.3
   5.3124    441(26)       0.001469    120.7   465.2
   5.3134    467(27)       0.001390    120.7   460.7
   5.3144    449(26)       0.001440    120.7   457.9
   5.3154    427(26)       0.001518    120.7   456.7
   5.3164    437(26)       0.001483    120.7   457.3
   5.3174    456(26)       0.001427    120.7   459.8
   5.3184    466(27)       0.001394    120.7   464.6
   5.3194    491(28)       0.001321    120.7   471.8
   5.3204    484(27)       0.001343    120.7   482.2
   5.3214    460(27)       0.001402    120.7   496.6
   5.3224    525(28)       0.001234    120.7   517.1
   5.3234    585(30)       0.001111    120.7   547.6
   5.3244    598(30)       0.001082    120.7   596.9
   5.3254    692(33)       0.000937    120.7   682.4
   5.3264    776(35)       0.000838    120.7   835.1
   5.3274    1011(39)      0.000643    121.    1102.
   5.3284    1365(46)      0.000478    121.    1540.
   5.3294    1907(54)      0.0003405   121.    2202.
   5.3304    2666(64)      0.0002442   121.    3099.
   5.3314    3899(77)      0.0001669   121.    4173.
   5.3324    5303(90)      0.0001222   121.    5263.
   5.3334    6540(100)     0.0000989   121.    6109.
   5.3344    7320(110)     0.0000884   121.    6408.
   5.3354    6860(100)     0.0000942   121.    6030.
   5.3364    5616(93)      0.0001153   121.    5139.
   5.3374    4143(80)      0.0001562   121.    4040.
   5.3384    2961(67)      0.0002198   121.    2985.
   5.3394    1985(55)      0.0003278   121.    2118.
   5.3404    1404(46)      0.000463    121.    1490.
   5.3414    1111(41)      0.000585    121.    1081.
   5.3424    931(38)       0.000699    121.    839.
   5.3434    817(36)       0.000793    121.    708.
   5.3444    782(35)       0.000827    120.8   647.9
   5.3454    711(33)       0.000909    120.8   637.3
   5.3464    671(32)       0.000965    120.8   673.7
   5.3474    730(34)       0.000890    120.8   767.4
   5.3484    901(37)       0.000721    121.    933.
   5.3494    1147(42)      0.000565    121.    1176.
   5.3504    1482(48)      0.000438    121.    1483.
   5.3514    1969(55)      0.0003300   121.    1805.
   5.3524    2414(61)      0.0002674   121.    2063.
   5.3534    2577(63)      0.0002504   121.    2159.
   5.3544    2467(62)      0.0002616   121.    2049.
   5.3554    2090(57)      0.0003096   121.    1783.
   5.3564    1494(48)      0.000435    121.    1457.
   5.3574    1055(40)      0.000613    121.    1152.
   5.3584    829(36)       0.000783    121.    910.
   5.3594    720(33)       0.000901    120.9   744.7
   5.3604    673(32)       0.000965    120.9   647.2
   5.3614    623(31)       0.001038    120.9   599.3
   5.3624    600(30)       0.001077    120.9   583.9
   5.3634    560(29)       0.001156    120.9   588.7
   5.3644    587(30)       0.001102    120.9   586.0
   5.3654    657(32)       0.000984    120.9   616.3
   5.3664    673(32)       0.000964    120.9   659.4
   5.3674    769(34)       0.000843    120.9   720.9
   5.3684    898(37)       0.000720    121.    815.
   5.3694    1018(40)      0.000637    121.    971.
   5.3704    1269(44)      0.000515    121.    1246.
   5.3714    1674(51)      0.000387    121.    1736.
   5.3724    2138(57)      0.0003044   121.    2578.
   5.3734    3193(70)      0.0002041   121.    3922.
   5.3744    4867(86)      0.0001339   121.    5864.
   5.3754    7300(110)     0.0000891   121.    8363.
   5.3764    10700(130)    0.0000606   121.    11155.
   5.3774    14240(150)    0.0000453   121.    13696.
   5.3784    17050(160)    0.0000378   121.    15226.
   5.3794    17540(170)    0.0000368   121.    15114.
   5.3804    15500(160)    0.0000417   121.    13411.
   5.3814    11560(130)    0.0000561   121.    10797.
   5.3824    7830(110)     0.0000832   121.    8016.
   5.3834    5049(88)      0.0001291   121.    5574.
   5.3844    3278(71)      0.0001990   121.    3705.
   5.3854    2266(59)      0.0002876   121.    2429.
   5.3864    1602(50)      0.000405    121.    1636.
   5.3874    1186(43)      0.000546    121.    1175.
   5.3884    981(39)       0.000663    121.    915.
   5.3894    820(36)       0.000793    121.    765.
   5.3904    738(34)       0.000876    121.0   670.7
   5.3914    671(32)       0.000966    121.0   605.4
   5.3924    589(30)       0.001103    121.0   556.2
   5.3934    532(29)       0.001219    121.0   517.0
   5.3944    507(28)       0.001281    121.0   484.8
   5.3954    456(27)       0.001423    121.0   458.0
   5.3964    453(26)       0.001430    121.0   435.4
   5.3974    455(26)       0.001426    121.0   416.0
   5.3984    437(26)       0.001482    121.0   399.4
   5.3994    362(24)       0.001794    121.0   385.1
   5.4004    361(24)       0.001796    121.0   372.6
   5.4014    354(23)       0.001827    121.0   361.6
   5.4024    344(23)       0.001880    121.1   351.9
   5.4034    329(23)       0.001964    121.1   343.3
   5.4044    337(23)       0.001913    121.1   335.7
   5.4054    330(23)       0.001960    121.1   328.9
   5.4064    317(22)       0.002039    121.1   322.7
   5.4074    326(22)       0.001985    121.1   317.2
   5.4084    346(23)       0.001873    121.1   312.2
   5.4094    344(23)       0.001864    121.1   307.7
   5.4104    312(22)       0.002067    121.1   303.5
   5.4114    292(21)       0.002225    121.1   299.7
   5.4124    317(22)       0.002041    121.1   296.3
   5.4134    309(22)       0.002093    121.1   293.1
   5.4144    326(22)       0.001990    121.1   290.2
   5.4154    295(21)       0.002196    121.1   287.5
   5.4164    254(20)       0.002539    121.1   281.3
   5.4174    273(20)       0.002381    121.1   279.0
   5.4184    280(21)       0.002305    121.1   276.9
   5.4194    278(21)       0.002323    121.1   275.0
   5.4204    290(21)       0.002218    121.1   273.2
   5.4214    263(20)       0.002460    121.1   271.6
   5.4224    291(21)       0.002219    121.1   270.0
   5.4234    266(20)       0.002431    121.1   268.5
   5.4244    290(21)       0.002225    121.1   267.1
   5.4254    279(21)       0.002323    121.1   265.9
   5.4264    258(20)       0.002504    121.1   264.6
   5.4274    281(21)       0.002296    121.2   263.5
   5.4284    260(20)       0.002498    121.2   262.4
   5.4294    300(22)       0.002162    121.2   261.4
   5.4304    289(21)       0.002242    121.2   260.4
   5.4314    259(20)       0.002484    121.2   259.5
   5.4324    292(21)       0.002216    121.2   258.7
   5.4334    265(20)       0.002448    121.2   257.8
   5.4344    274(21)       0.002362    121.2   257.1
   5.4354    263(20)       0.002468    121.2   255.4
   5.4364    294(21)       0.002180    121.2   254.7
   5.4374    268(20)       0.002399    121.2   254.1
   5.4384    279(21)       0.002315    121.2   253.4
   5.4394    261(20)       0.002464    121.2   252.9
   5.4404    258(20)       0.002491    121.2   252.3
   5.4414    257(20)       0.002503    121.2   251.7
   5.4424    248(20)       0.002600    121.2   251.2
   5.4434    269(20)       0.002399    121.2   250.7
   5.4444    253(20)       0.002554    121.2   250.3
   5.4454    294(21)       0.002202    121.2   249.8
   5.4464    296(21)       0.002191    121.2   249.4
   5.4474    261(20)       0.002486    121.2   248.9
   5.4484    259(20)       0.002496    121.2   248.5
   5.4494    244(19)       0.002639    121.2   248.2
   5.4504    225(19)       0.002854    121.2   247.8
   5.4514    267(20)       0.002396    121.3   247.4
   5.4524    233(19)       0.002769    121.3   247.1
   5.4534    263(20)       0.002461    121.3   246.7
   5.4544    280(21)       0.002314    121.3   246.4
   5.4554    251(20)       0.002593    121.3   246.1
   5.4564    264(20)       0.002471    121.3   245.8
   5.4574    252(20)       0.002566    121.3   245.5
   5.4584    244(19)       0.002636    121.3   245.2
   5.4594    260(20)       0.002481    121.3   244.9
   5.4604    242(19)       0.002664    121.3   235.6
   5.4614    245(19)       0.002643    121.3   235.6
   5.4624    284(21)       0.002280    121.3   235.5
   5.4634    268(20)       0.002420    121.3   235.5
   5.4644    249(20)       0.002595    121.3   235.5
   5.4654    234(19)       0.002761    121.3   235.4
   5.4664    211(18)       0.003080    121.3   235.4
   5.4674    256(20)       0.002528    121.3   235.3
   5.4684    276(21)       0.002348    121.3   235.3
   5.4694    251(20)       0.002570    121.3   235.3
   5.4704    243(19)       0.002667    121.3   235.2
   5.4714    256(20)       0.002521    121.3   235.2
   5.4724    264(20)       0.002441    121.3   235.1
   5.4734    256(20)       0.002522    121.3   235.1
   5.4744    251(20)       0.002583    121.3   235.0
   5.4754    222(18)       0.002923    121.3   235.0
   5.4764    240(19)       0.002706    121.4   235.0
   5.4774    241(19)       0.002694    121.4   234.9
   5.4784    230(19)       0.002827    121.4   234.9
   5.4794    243(19)       0.002657    121.4   234.8
   5.4804    233(19)       0.002755    121.4   234.8
   5.4814    233(19)       0.002757    121.4   234.8
   5.4824    262(20)       0.002471    121.4   234.7
   5.4834    229(19)       0.002837    121.4   234.7
   5.4844    240(19)       0.002714    121.4   234.6
   5.4854    223(19)       0.002880    121.4   234.6
   5.4864    256(20)       0.002538    121.4   234.5
   5.4874    233(19)       0.002778    121.4   234.5
   5.4884    260(20)       0.002483    121.4   234.5
   5.4894    249(20)       0.002628    121.4   234.4
   5.4904    253(20)       0.002552    121.4   234.4
   5.4914    246(19)       0.002633    121.4   234.3
   5.4924    255(20)       0.002530    121.4   234.3
   5.4934    250(20)       0.002577    121.4   234.2
   5.4944    234(19)       0.002743    121.4   234.2
   5.4954    214(18)       0.003032    121.4   234.2
   5.4964    248(20)       0.002606    121.4   234.1
   5.4974    235(19)       0.002749    121.4   234.1
   5.4984    251(20)       0.002568    121.4   234.0
   5.4994    269(20)       0.002397    121.4   234.0
   5.5004    227(19)       0.002849    121.5   233.9
   5.5014    253(20)       0.002545    121.5   233.9
   5.5024    244(19)       0.002658    121.5   233.8
   5.5034    228(19)       0.002833    121.5   233.8
   5.5044    241(19)       0.002686    121.5   233.8
   5.5054    249(20)       0.002608    121.5   233.7
   5.5064    243(19)       0.002676    121.5   233.7
   5.5074    254(20)       0.002550    121.5   233.6
   5.5084    233(19)       0.002787    121.5   233.6
   5.5094    213(18)       0.003038    121.5   233.5
   5.5104    235(19)       0.002750    121.5   233.5
   5.5114    238(19)       0.002729    121.5   233.5
   5.5124    213(18)       0.003048    121.5   233.4
   5.5134    200(18)       0.003223    121.5   233.4
   5.5144    238(19)       0.002705    121.5   233.3
   5.5154    215(18)       0.003013    121.5   233.3
   5.5164    235(19)       0.002749    121.5   233.2
   5.5174    247(20)       0.002598    121.5   233.2
   5.5184    242(19)       0.002647    121.5   233.1
   5.5194    238(19)       0.002711    121.5   233.1
   5.5204    234(19)       0.002749    121.5   233.1
   5.5214    222(19)       0.002894    121.5   233.0
   5.5224    250(20)       0.002585    121.5   233.0
   5.5234    241(19)       0.002687    121.5   232.9
   5.5244    235(19)       0.002773    121.5   232.9
   5.5254    245(19)       0.002644    121.6   232.8
   5.5264    228(19)       0.002849    121.6   232.8
   5.5274    217(18)       0.002965    121.6   232.7
   5.5284    226(19)       0.002861    121.6   232.7
   5.5294    238(19)       0.002723    121.6   232.7
   5.5304    226(19)       0.002877    121.6   232.6
   5.5314    238(19)       0.002697    121.6   232.6
   5.5324    230(19)       0.002808    121.6   232.5
   5.5334    214(18)       0.002991    121.6   232.5
   5.5344    220(18)       0.002939    121.6   232.4
   5.5354    230(19)       0.002823    121.6   232.4
   5.5364    221(18)       0.002925    121.6   232.3
   5.5374    217(18)       0.002998    121.6   232.3
   5.5384    234(19)       0.002778    121.6   232.2
   5.5394    234(19)       0.002765    121.6   232.2
   5.5404    239(19)       0.002676    121.6   232.2
   5.5414    231(19)       0.002783    121.6   232.1
   5.5424    223(19)       0.002908    121.6   232.1
   5.5434    207(18)       0.003147    121.6   232.0
   5.5444    211(18)       0.003042    121.6   232.0
   5.5454    217(18)       0.002953    121.6   231.9
   5.5464    210(18)       0.003088    121.6   231.9
   5.5474    211(18)       0.003048    121.6   231.8
   5.5484    217(18)       0.002972    121.6   231.8
   5.5494    248(20)       0.002603    121.6   231.7
   5.5504    229(19)       0.002817    121.7   231.7
   5.5514    209(18)       0.003077    121.7   231.7
   5.5524    208(18)       0.003102    121.7   231.6
   5.5534    210(18)       0.003069    121.7   231.6
   5.5544    218(18)       0.002969    121.7   231.5
   5.5554    225(19)       0.002884    121.7   231.5
   5.5564    248(20)       0.002610    121.7   231.4
   5.5574    240(19)       0.002699    121.7   231.4
   5.5584    235(19)       0.002754    121.7   231.3
   5.5594    228(19)       0.002835    121.7   231.3
   5.5604    242(19)       0.002675    121.7   231.2
   5.5614    230(19)       0.002823    121.7   231.2
   5.5624    254(20)       0.002539    121.7   231.1
   5.5634    245(19)       0.002630    121.7   231.1
   5.5644    227(19)       0.002847    121.7   231.1
   5.5654    241(19)       0.002685    121.7   231.0
   5.5664    237(19)       0.002735    121.7   231.0
   5.5674    226(19)       0.002855    121.7   230.9
   5.5684    237(19)       0.002718    121.7   230.9
   5.5694    215(18)       0.003015    121.7   230.8
   5.5704    222(19)       0.002920    121.7   230.8
   5.5714    217(18)       0.003010    121.7   230.7
   5.5724    192(17)       0.003373    121.7   230.7
   5.5734    215(18)       0.003023    121.7   230.6
   5.5744    229(19)       0.002814    121.8   230.6
   5.5754    257(20)       0.002515    121.8   230.5
   5.5764    264(20)       0.002461    121.8   230.5
   5.5774    234(19)       0.002760    121.8   230.4
   5.5784    195(17)       0.003306    121.8   230.4
   5.5794    194(17)       0.003376    121.8   230.3
   5.5804    208(18)       0.003147    121.8   230.3
   5.5814    228(19)       0.002842    121.8   230.3
   5.5824    216(18)       0.002982    121.8   230.2
   5.5834    232(19)       0.002776    121.8   230.2
   5.5844    216(18)       0.002981    121.8   230.5
   5.5854    203(18)       0.003189    121.8   230.4
   5.5864    200(18)       0.003250    121.8   230.4
   5.5874    232(19)       0.002787    121.8   230.4
   5.5884    229(19)       0.002833    121.8   230.3
   5.5894    230(19)       0.002812    121.8   230.3
   5.5904    247(19)       0.002633    121.8   230.3
   5.5914    212(18)       0.003073    121.8   230.2
   5.5924    206(18)       0.003136    121.8   230.2
   5.5934    232(19)       0.002789    121.8   230.2
   5.5944    204(18)       0.003182    121.8   230.1
   5.5954    214(18)       0.003017    121.8   230.1
   5.5964    197(17)       0.003282    121.8   230.1
   5.5974    219(18)       0.002954    121.8   230.0
   5.5984    207(18)       0.003138    121.8   230.0
   5.5994    238(19)       0.002725    121.9   230.0
   5.6004    226(19)       0.002859    121.9   229.9
   5.6014    240(19)       0.002710    121.9   229.9
   5.6024    220(18)       0.002925    121.9   229.9
   5.6034    216(18)       0.003011    121.9   229.9
   5.6044    213(18)       0.003067    121.9   229.8
   5.6054    216(18)       0.002978    121.9   229.8
   5.6064    209(18)       0.003073    121.9   229.8
   5.6074    216(18)       0.002989    121.9   229.8
   5.6084    228(19)       0.002830    121.9   229.8
   5.6094    206(18)       0.003149    121.9   229.7
   5.6104    209(18)       0.003077    121.9   229.7
   5.6114    202(18)       0.003171    121.9   229.7
   5.6124    207(18)       0.003118    121.9   229.7
   5.6134    229(19)       0.002827    121.9   229.7
   5.6144    257(20)       0.002532    121.9   229.7
   5.6154    215(18)       0.003050    121.9   229.7
   5.6164    228(19)       0.002821    121.9   229.7
   5.6174    233(19)       0.002763    121.9   229.7
   5.6184    245(19)       0.002642    121.9   229.7
   5.6194    243(19)       0.002652    121.9   229.7
   5.6204    234(19)       0.002769    121.9   229.8
   5.6214    222(19)       0.002905    121.9   229.8
   5.6224    250(20)       0.002589    121.9   229.8
   5.6234    201(18)       0.003224    121.9   229.9
   5.6244    235(19)       0.002735    122.0   229.9
   5.6254    231(19)       0.002792    122.0   230.0
   5.6264    246(20)       0.002620    122.0   230.0
   5.6274    219(18)       0.002958    122.0   230.1
   5.6284    221(18)       0.002929    122.0   230.2
   5.6294    228(19)       0.002845    122.0   230.3
   5.6304    240(19)       0.002703    122.0   230.5
   5.6314    224(19)       0.002886    122.0   230.6
   5.6324    211(18)       0.003065    122.0   230.8
   5.6334    224(19)       0.002891    122.0   231.0
   5.6344    245(19)       0.002645    122.0   231.2
   5.6354    239(19)       0.002707    122.0   231.4
   5.6364    212(18)       0.003047    122.0   231.7
   5.6374    229(19)       0.002821    122.0   232.1
   5.6384    210(18)       0.003085    122.0   232.8
   5.6394    206(18)       0.003134    122.0   233.3
   5.6404    233(19)       0.002787    122.0   233.9
   5.6414    217(18)       0.002982    122.0   234.6
   5.6424    203(18)       0.003175    122.0   235.4
   5.6434    211(18)       0.003058    122.0   236.4
   5.6444    231(19)       0.002799    122.0   237.7
   5.6454    234(19)       0.002769    122.0   239.3
   5.6464    227(19)       0.002828    122.0   241.4
   5.6474    247(20)       0.002622    122.0   244.4
   5.6484    233(19)       0.002813    122.0   249.3
   5.6494    273(21)       0.002377    122.1   257.8
   5.6504    263(20)       0.002450    122.1   273.0
   5.6514    302(22)       0.002142    122.1   299.1
   5.6524    323(22)       0.001999    122.1   341.1
   5.6534    366(24)       0.001778    122.1   402.7
   5.6544    495(28)       0.001302    122.1   483.1
   5.6554    598(30)       0.001082    122.1   574.6
   5.6564    768(35)       0.000840    122.1   660.6
   5.6574    885(37)       0.000727    122.    717.
   5.6584    904(37)       0.000714    122.    720.
   5.6594    859(36)       0.000752    122.    670.
   5.6604    676(32)       0.000956    122.1   585.7
   5.6614    534(29)       0.001210    122.1   493.7
   5.6624    433(26)       0.001490    122.1   411.4
   5.6634    349(23)       0.001860    122.1   347.3
   5.6644    302(22)       0.002138    122.1   303.0
   5.6654    278(21)       0.002337    122.1   275.1
   5.6664    245(19)       0.002652    122.1   258.8
   5.6674    241(19)       0.002670    122.1   249.6
   5.6684    250(20)       0.002583    122.1   244.3
   5.6694    233(19)       0.002775    122.1   241.1
   5.6704    227(19)       0.002856    122.1   238.9
   5.6714    209(18)       0.003101    122.1   237.2
   5.6724    202(18)       0.003205    122.1   235.9
   5.6734    243(19)       0.002653    122.1   234.8
   5.6744    282(21)       0.002290    122.1   234.0
   5.6754    248(20)       0.002603    122.2   233.2
   5.6764    209(18)       0.003085    122.2   232.6
   5.6774    227(19)       0.002863    122.2   232.1
   5.6784    214(18)       0.003017    122.2   231.7
   5.6794    232(19)       0.002783    122.2   231.3
   5.6804    221(19)       0.002912    122.2   231.0
   5.6814    227(19)       0.002868    122.2   230.8
   5.6824    214(18)       0.003043    122.2   230.6
   5.6834    222(19)       0.002903    122.2   230.4
   5.6844    248(20)       0.002602    122.2   230.3
   5.6854    210(18)       0.003097    122.2   230.2
   5.6864    196(17)       0.003296    122.2   230.2
   5.6874    182(17)       0.00353     122.2   230.2
   5.6884    215(18)       0.003014    122.2   230.3
   5.6894    201(18)       0.003242    122.2   230.4
   5.6904    211(18)       0.003079    122.2   230.5
   5.6914    215(18)       0.002993    122.2   230.7
   5.6924    224(19)       0.002892    122.2   231.0
   5.6934    200(18)       0.003257    122.2   231.4
   5.6944    228(19)       0.002843    122.2   231.8
   5.6954    251(20)       0.002571    122.2   232.4
   5.6964    248(20)       0.002588    122.2   233.1
   5.6974    237(19)       0.002699    122.2   234.0
   5.6984    222(19)       0.002897    122.2   235.1
   5.6994    218(18)       0.002949    122.2   236.5
   5.7004    207(18)       0.003122    122.3   238.4
   5.7014    248(20)       0.002614    122.3   241.3
   5.7024    247(20)       0.002628    122.3   246.1
   5.7034    252(20)       0.002565    122.3   254.8
   5.7044    247(20)       0.002608    122.3   271.0
   5.7054    268(20)       0.002402    122.3   299.9
   5.7064    288(21)       0.002243    122.3   347.8
   5.7074    352(23)       0.001833    122.3   418.6
   5.7084    439(26)       0.001465    122.3   510.6
   5.7094    525(28)       0.001236    122.3   612.5
   5.7104    655(32)       0.000991    122.3   701.9
   5.7114    779(35)       0.000829    122.3   748.4
   5.7124    818(36)       0.000790    122.    731.
   5.7134    708(33)       0.000914    122.3   658.1
   5.7144    588(30)       0.001102    122.3   558.4
   5.7154    470(27)       0.001371    122.3   459.5
   5.7164    386(24)       0.001678    122.3   377.7
   5.7174    324(22)       0.001990    122.3   319.0
   5.7184    263(20)       0.002447    122.3   281.7
   5.7194    271(21)       0.002378    122.3   260.0
   5.7204    235(19)       0.002761    122.3   248.2
   5.7214    254(20)       0.002559    122.3   241.7
   5.7224    254(20)       0.002551    122.3   237.9
   5.7234    244(19)       0.002663    122.3   235.4
   5.7244    220(18)       0.002952    122.3   233.6
   5.7254    200(18)       0.003222    122.4   232.2
   5.7264    198(18)       0.003255    122.4   231.1
   5.7274    214(18)       0.003032    122.4   230.1
   5.7284    211(18)       0.003083    122.4   229.3
   5.7294    223(19)       0.002906    122.4   228.6
   5.7304    217(18)       0.002986    122.4   228.0
   5.7314    220(18)       0.002940    122.4   227.5
   5.7324    232(19)       0.002784    122.4   227.0
   5.7334    228(19)       0.002860    122.4   226.6
   5.7344    218(18)       0.002978    122.4   226.2
   5.7354    194(17)       0.003315    122.4   225.9
   5.7364    222(19)       0.002915    122.4   225.6
   5.7374    215(18)       0.003020    122.4   225.4
   5.7384    230(19)       0.002811    122.4   225.1
   5.7394    204(18)       0.003174    122.4   224.6
   5.7404    222(19)       0.002919    122.4   224.4
   5.7414    216(18)       0.002975    122.4   224.2
   5.7424    213(18)       0.003032    122.4   224.0
   5.7434    203(18)       0.003186    122.4   223.8
   5.7444    227(19)       0.002852    122.4   223.7
   5.7454    241(19)       0.002678    122.4   223.5
   5.7464    217(18)       0.002973    122.4   223.4
   5.7474    207(18)       0.003122    122.4   223.3
   5.7484    201(18)       0.003234    122.4   223.2
   5.7494    195(17)       0.003316    122.4   223.0
   5.7504    201(18)       0.003206    122.5   222.9
   5.7514    199(18)       0.003242    122.5   222.8
   5.7524    176(17)       0.00365     122.5   222.7
   5.7534    202(18)       0.003193    122.5   222.6
   5.7544    226(19)       0.002880    122.5   222.5
   5.7554    224(19)       0.002917    122.5   222.4
   5.7564    215(18)       0.002972    122.5   222.3
   5.7574    230(19)       0.002806    122.5   222.2
   5.7584    219(18)       0.002939    122.5   222.1
   5.7594    231(19)       0.002785    122.5   222.1
   5.7604    213(18)       0.003033    122.5   222.0
   5.7614    209(18)       0.003106    122.5   221.9
   5.7624    187(17)       0.003470    122.5   221.8
   5.7634    188(17)       0.003447    122.5   221.7
   5.7644    217(18)       0.002991    122.5   221.7
   5.7654    212(18)       0.003060    122.5   221.6
   5.7664    187(17)       0.003470    122.5   221.5
   5.7674    201(18)       0.003217    122.5   221.4
   5.7684    175(16)       0.00373     122.5   221.4
   5.7694    181(17)       0.00362     122.5   221.3
   5.7704    197(17)       0.003270    122.5   221.2
   5.7714    222(19)       0.002889    122.5   221.1
   5.7724    217(18)       0.002968    122.5   221.1
   5.7734    212(18)       0.003045    122.5   221.0
   5.7744    197(17)       0.003290    122.5   220.9
   5.7754    220(18)       0.002941    122.5   220.9
   5.7764    216(18)       0.003014    122.6   220.8
   5.7774    188(17)       0.003443    122.6   220.7
   5.7784    197(17)       0.003315    122.6   220.7
   5.7794    224(19)       0.002896    122.6   220.6
   5.7804    203(18)       0.003211    122.6   220.6
   5.7814    169(16)       0.00378     122.6   220.5
   5.7824    169(16)       0.00382     122.6   220.4
   5.7834    200(18)       0.003250    122.6   220.4
   5.7844    217(18)       0.002972    122.6   220.3
   5.7854    195(17)       0.003315    122.6   220.2
   5.7864    210(18)       0.003065    122.6   220.2
   5.7874    214(18)       0.002983    122.6   220.1
   5.7884    220(19)       0.002910    122.6   220.1
   5.7894    199(18)       0.003249    122.6   220.0
   5.7904    210(18)       0.003086    122.6   219.9
   5.7914    194(17)       0.003349    122.6   219.9
   5.7924    187(17)       0.003474    122.6   219.8
   5.7934    196(17)       0.003288    122.6   219.5
   5.7944    180(17)       0.00360     122.6   219.4
   5.7954    191(17)       0.003392    122.6   219.4
   5.7964    166(16)       0.00389     122.6   219.3
   5.7974    189(17)       0.003430    122.6   219.3
   5.7984    178(17)       0.00363     122.6   219.2
   5.7994    207(18)       0.003153    122.6   219.2
   5.8004    208(18)       0.003113    122.6   219.1
   5.8014    184(17)       0.003497    122.7   219.1
   5.8024    213(18)       0.003039    122.7   219.0
   5.8034    210(18)       0.003088    122.7   219.0
   5.8044    213(18)       0.003058    122.7   218.9
   5.8054    193(17)       0.003398    122.7   218.9
   5.8064    197(17)       0.003307    122.7   218.8
   5.8074    227(19)       0.002845    122.7   218.8
   5.8084    212(18)       0.003051    122.7   218.7
   5.8094    195(17)       0.003326    122.7   218.7
   5.8104    214(18)       0.003019    122.7   218.6
   5.8114    216(18)       0.002994    122.7   218.6
   5.8124    192(17)       0.003387    122.7   218.5
   5.8134    202(18)       0.003206    122.7   218.4
   5.8144    210(18)       0.003074    122.7   218.4
   5.8154    180(17)       0.00358     122.7   218.3
   5.8164    208(18)       0.003105    122.7   218.3
   5.8174    195(17)       0.003294    122.7   218.2
   5.8184    197(17)       0.003300    122.7   218.2
   5.8194    196(17)       0.003301    122.7   218.1
   5.8204    201(18)       0.003204    122.7   218.1
   5.8214    195(17)       0.003311    122.7   218.0
   5.8224    192(17)       0.003368    122.7   218.0
   5.8234    211(18)       0.003077    122.7   217.9
   5.8244    212(18)       0.003067    122.7   217.9
   5.8254    192(17)       0.003379    122.7   217.8
   5.8264    223(18)       0.002931    122.7   217.8
   5.8274    210(18)       0.003121    122.8   217.7
   5.8284    213(18)       0.003036    122.8   217.6
   5.8294    204(18)       0.003150    122.8   217.6
   5.8304    195(17)       0.003303    122.8   217.5
   5.8314    197(17)       0.003338    122.8   217.5
   5.8324    193(17)       0.003391    122.8   217.4
   5.8334    172(16)       0.00376     122.8   217.4
   5.8344    175(16)       0.00369     122.8   217.3
   5.8354    176(17)       0.00365     122.8   217.3
   5.8364    210(18)       0.003070    122.8   217.2
   5.8374    217(18)       0.002974    122.8   217.2
   5.8384    212(18)       0.003058    122.8   217.1
   5.8394    204(18)       0.003181    122.8   217.1
   5.8404    212(18)       0.003039    122.8   217.0
   5.8414    186(17)       0.003445    122.8   217.0
   5.8424    200(18)       0.003230    122.8   216.9
   5.8434    206(18)       0.003149    122.8   216.9
   5.8444    201(18)       0.003215    122.8   216.8
   5.8454    204(18)       0.003172    122.8   216.7
   5.8464    201(18)       0.003192    122.8   216.7
   5.8474    185(17)       0.003478    122.8   216.6
   5.8484    200(18)       0.003244    122.8   216.6
   5.8494    217(18)       0.003005    122.8   216.5
   5.8504    201(18)       0.003235    122.8   216.5
   5.8514    185(17)       0.003505    122.8   216.4
   5.8524    212(18)       0.003045    122.8   216.4
   5.8534    183(17)       0.00356     122.9   216.3
   5.8544    190(17)       0.003431    122.9   216.3
   5.8554    223(19)       0.002910    122.9   216.2
   5.8564    216(18)       0.002986    122.9   216.2
   5.8574    220(18)       0.002951    122.9   216.1
   5.8584    213(18)       0.003050    122.9   216.1
   5.8594    185(17)       0.003495    122.9   216.0
   5.8604    183(17)       0.00351     122.9   216.0
   5.8614    187(17)       0.003470    122.9   215.9
   5.8624    213(18)       0.003035    122.9   215.8
   5.8634    185(17)       0.003459    122.9   215.8
   5.8644    193(17)       0.003343    122.9   215.7
   5.8654    197(17)       0.003269    122.9   215.7
   5.8664    219(18)       0.002946    122.9   215.6
   5.8674    187(17)       0.003448    122.9   215.6
   5.8684    207(18)       0.003156    122.9   215.5
   5.8694    198(17)       0.003289    122.9   215.5
   5.8704    208(18)       0.003098    122.9   215.4
   5.8714    204(18)       0.003175    122.9   215.4
   5.8724    208(18)       0.003090    122.9   215.3
   5.8734    216(18)       0.002990    122.9   215.3
   5.8744    216(18)       0.002994    122.9   215.2
   5.8754    237(19)       0.002709    122.9   215.2
   5.8764    203(18)       0.003161    122.9   215.1
   5.8774    173(16)       0.00375     122.9   215.1
   5.8784    199(18)       0.003257    123.0   215.0
   5.8794    194(17)       0.003322    123.0   214.9
   5.8804    216(18)       0.002991    123.0   214.9
   5.8814    161(16)       0.00404     123.0   214.8
   5.8824    205(18)       0.003169    123.0   214.8
   5.8834    199(18)       0.003244    123.0   214.7
   5.8844    206(18)       0.003135    123.0   214.7
   5.8854    201(18)       0.003236    123.0   214.6
   5.8864    203(18)       0.003188    123.0   214.6
   5.8874    187(17)       0.003462    123.0   214.5
   5.8884    194(17)       0.003346    123.0   214.5
   5.8894    201(18)       0.003207    123.0   214.4
   5.8904    188(17)       0.003408    123.0   214.4
   5.8914    190(17)       0.003390    123.0   214.3
   5.8924    190(17)       0.003390    123.0   214.3
   5.8934    177(16)       0.00370     123.0   214.2
   5.8944    230(19)       0.002819    123.0   214.2
   5.8954    205(18)       0.003148    123.0   214.1
   5.8964    192(17)       0.003360    123.0   214.0
   5.8974    191(17)       0.003368    123.0   214.9
   5.8984    174(16)       0.00371     123.0   214.9
   5.8994    182(17)       0.00355     123.0   214.9
   5.9004    190(17)       0.003368    123.0   214.8
   5.9014    207(18)       0.003108    123.0   214.8
   5.9024    197(17)       0.003290    123.0   214.8
   5.9034    203(18)       0.003183    123.0   214.8
   5.9044    196(17)       0.003315    123.1   214.8
   5.9054    202(18)       0.003199    123.1   214.7
   5.9064    207(18)       0.003116    123.1   214.7
   5.9074    183(17)       0.00352     123.1   214.7
   5.9084    203(18)       0.003154    123.1   214.7
   5.9094    193(17)       0.003359    123.1   214.7
   5.9104    192(17)       0.003345    123.1   214.7
   5.9114    200(18)       0.003258    123.1   214.7
   5.9124    191(17)       0.003390    123.1   214.7
   5.9134    199(18)       0.003241    123.1   214.7
   5.9144    202(18)       0.003197    123.1   214.7
   5.9154    183(17)       0.00353     123.1   214.7
   5.9164    206(18)       0.003122    123.1   214.7
   5.9174    200(18)       0.003224    123.1   214.7
   5.9184    203(18)       0.003183    123.1   214.7
   5.9194    203(18)       0.003172    123.1   214.7
   5.9204    202(18)       0.003230    123.1   214.8
   5.9214    201(18)       0.003238    123.1   214.8
   5.9224    196(17)       0.003308    123.1   214.8
   5.9234    176(16)       0.00368     123.1   214.9
   5.9244    205(18)       0.003143    123.1   214.9
   5.9254    202(18)       0.003217    123.1   215.0
   5.9264    210(18)       0.003078    123.1   215.0
   5.9274    215(18)       0.003017    123.1   215.1
   5.9284    183(17)       0.00357     123.1   215.2
   5.9294    199(18)       0.003255    123.1   215.2
   5.9304    211(18)       0.003061    123.2   215.3
   5.9314    183(17)       0.00352     123.2   215.5
   5.9324    215(18)       0.003012    123.2   215.6
   5.9334    210(18)       0.003062    123.2   215.7
   5.9344    202(18)       0.003200    123.2   215.9
   5.9354    187(17)       0.003438    123.2   216.0
   5.9364    193(17)       0.003372    123.2   216.2
   5.9374    178(17)       0.00364     123.2   216.4
   5.9384    191(17)       0.003392    123.2   216.6
   5.9394    194(17)       0.003345    123.2   216.9
   5.9404    170(16)       0.00379     123.2   217.2
   5.9414    189(17)       0.003431    123.2   217.5
   5.9424    181(17)       0.00355     123.2   217.9
   5.9434    197(17)       0.003286    123.2   218.3
   5.9444    215(18)       0.003003    123.2   218.8
   5.9454    192(17)       0.003349    123.2   219.3
   5.9464    210(18)       0.003054    123.2   219.9
   5.9474    218(19)       0.002918    123.2   220.6
   5.9484    209(18)       0.003093    123.2   221.4
   5.9494    226(19)       0.002871    123.2   222.3
   5.9504    214(18)       0.003046    123.2   223.4
   5.9514    194(17)       0.003343    123.2   224.6
   5.9524    202(18)       0.003206    123.2   226.0
   5.9534    244(19)       0.002681    123.2   227.7
   5.9544    227(19)       0.002852    123.2   229.7
   5.9554    200(18)       0.003251    123.2   232.1
   5.9564    214(18)       0.003017    123.3   235.1
   5.9574    213(18)       0.003015    123.3   238.8
   5.9584    227(19)       0.002837    123.3   243.6
   5.9594    235(19)       0.002742    123.3   250.4
   5.9603    259(20)       0.002488    123.3   261.1
   5.9613    253(20)       0.002541    123.3   279.3
   5.9623    281(21)       0.002297    123.3   311.4
   5.9633    302(22)       0.002147    123.3   367.3
   5.9643    352(23)       0.001848    123.3   459.1
   5.9653    461(27)       0.001418    123.3   597.0
   5.9663    650(32)       0.000997    123.3   782.8
   5.9673    875(37)       0.000739    123.    1003.
   5.9683    1071(41)      0.000605    123.    1223.
   5.9693    1399(47)      0.000461    123.    1388.
   5.9703    1506(48)      0.000427    123.    1436.
   5.9713    1508(48)      0.000427    123.    1346.
   5.9723    1264(44)      0.000512    123.    1157.
   5.9733    987(39)       0.000655    123.    932.
   5.9743    673(32)       0.000974    123.3   719.5
   5.9753    447(26)       0.001444    123.3   548.0
   5.9763    408(25)       0.001603    123.3   425.2
   5.9773    344(23)       0.001890    123.3   345.8
   5.9783    277(21)       0.002361    123.3   298.5
   5.9793    279(21)       0.002322    123.3   271.5
   5.9803    245(19)       0.002638    123.3   256.1
   5.9813    212(18)       0.003044    123.3   246.8
   5.9823    209(18)       0.003088    123.4   240.7
   5.9833    221(18)       0.002934    123.4   236.1
   5.9843    225(19)       0.002876    123.4   232.6
   5.9853    209(18)       0.003097    123.4   229.8
   5.9863    195(17)       0.003292    123.4   227.4
   5.9873    209(18)       0.003106    123.4   225.4
   5.9883    198(17)       0.003281    123.4   223.7
   5.9893    209(18)       0.003085    123.4   222.2
   5.9903    168(16)       0.00390     123.4   220.9
   5.9913    184(17)       0.00355     123.4   219.8
   5.9923    186(17)       0.003452    123.4   218.8
   5.9933    203(18)       0.003174    123.4   218.0
   5.9943    195(17)       0.003304    123.4   217.2
   5.9953    213(18)       0.003047    123.4   216.5
   5.9963    183(17)       0.00354     123.4   215.9
   5.9973    198(17)       0.003285    123.4   215.3
   5.9983    203(18)       0.003189    123.4   214.8
   5.9993    186(15)       0.00425     123.4   214.4
   6.0003    185(15)       0.00426     123.4   214.0
   6.0013    198(16)       0.00396     123.4   213.6
   6.0023    190(15)       0.00419     123.4   213.2
   6.0033    228(17)       0.003465    123.4   212.9
   6.0043    209(16)       0.00377     123.4   212.7
   6.0053    213(16)       0.00371     123.4   212.4
   6.0063    188(15)       0.00423     123.4   212.2
   6.0073    212(16)       0.00370     123.4   211.9
   6.0083    207(16)       0.00380     123.5   211.7
   6.0093    192(16)       0.00412     123.5   211.5
   6.0103    187(15)       0.00420     123.5   211.3
   6.0113    208(16)       0.00378     123.5   211.1
   6.0123    216(17)       0.00365     123.5   210.9
   6.0133    204(16)       0.00385     123.5   210.7
   6.0143    214(17)       0.00367     123.5   210.6
   6.0153    191(16)       0.00411     123.5   210.4
   6.0163    206(16)       0.00382     123.5   210.3
   6.0173    204(16)       0.00388     123.5   210.1
   6.0183    191(16)       0.00413     123.5   210.0
   6.0193    201(16)       0.00390     123.5   209.9
   6.0203    208(16)       0.00378     123.5   209.7
   6.0213    203(16)       0.00387     123.5   209.6
   6.0223    200(16)       0.00393     123.5   210.3
   6.0233    197(16)       0.00398     123.5   210.3
   6.0243    195(16)       0.00405     123.5   210.2
   6.0253    212(16)       0.00372     123.5   210.1
   6.0263    208(16)       0.00379     123.5   210.0
   6.0273    200(16)       0.00393     123.5   210.0
   6.0283    207(16)       0.00377     123.5   209.9
   6.0293    213(16)       0.00368     123.5   209.8
   6.0303    206(16)       0.00383     123.5   209.8
   6.0313    195(16)       0.00406     123.5   209.7
   6.0323    191(16)       0.00414     123.5   209.7
   6.0333    194(16)       0.00407     123.5   209.7
   6.0343    206(16)       0.00385     123.5   209.6
   6.0353    204(16)       0.00388     123.6   209.6
   6.0363    176(15)       0.00452     123.6   209.6
   6.0373    182(15)       0.00433     123.6   209.6
   6.0383    186(15)       0.00425     123.6   209.5
   6.0393    177(15)       0.00449     123.6   209.5
   6.0403    199(16)       0.00395     123.6   209.5
   6.0413    185(15)       0.00422     123.6   209.5
   6.0423    191(16)       0.00411     123.6   209.6
   6.0433    204(16)       0.00383     123.6   209.6
   6.0443    187(15)       0.00422     123.6   209.6
   6.0453    188(15)       0.00419     123.6   209.6
   6.0463    206(16)       0.00381     123.6   209.7
   6.0473    180(15)       0.00440     123.6   209.7
   6.0483    206(16)       0.00383     123.6   209.8
   6.0493    201(16)       0.00391     123.6   209.9
   6.0503    206(16)       0.00385     123.6   210.0
   6.0513    178(15)       0.00443     123.6   210.1
   6.0523    192(16)       0.00410     123.6   209.5
   6.0533    194(16)       0.00410     123.6   209.6
   6.0543    198(16)       0.00398     123.6   209.8
   6.0553    182(15)       0.00433     123.6   210.0
   6.0563    214(17)       0.00367     123.6   210.2
   6.0573    209(16)       0.00375     123.6   210.5
   6.0583    211(16)       0.00374     123.6   210.8
   6.0593    201(16)       0.00391     123.6   211.1
   6.0603    212(16)       0.00372     123.6   211.5
   6.0613    200(16)       0.00396     123.7   211.9
   6.0623    200(16)       0.00395     123.7   212.5
   6.0633    201(16)       0.00393     123.7   213.1
   6.0643    187(15)       0.00424     123.7   213.8
   6.0653    196(16)       0.00403     123.7   214.7
   6.0663    204(16)       0.00389     123.7   215.9
   6.0673    200(16)       0.00397     123.7   217.5
   6.0683    215(16)       0.00368     123.7   220.0
   6.0693    200(16)       0.00393     123.7   224.4
   6.0703    208(16)       0.00379     123.7   232.7
   6.0713    203(16)       0.00388     123.7   247.5
   6.0723    227(17)       0.003503    123.7   272.2
   6.0733    301(20)       0.002615    123.7   308.7
   6.0743    319(20)       0.002474    123.7   355.4
   6.0753    379(22)       0.002089    123.7   405.7
   6.0763    501(25)       0.001564    123.7   446.8
   6.0773    483(25)       0.001627    123.7   463.6
   6.0783    524(26)       0.001498    123.7   448.7
   6.0793    444(24)       0.001773    123.7   410.1
   6.0803    395(22)       0.001990    123.7   363.2
   6.0813    326(20)       0.002429    123.7   320.4
   6.0823    269(18)       0.002931    123.7   288.7
   6.0833    265(18)       0.002974    123.7   270.0
   6.0843    232(17)       0.003411    123.7   263.1
   6.0853    284(19)       0.002794    123.7   266.9
   6.0863    322(20)       0.002444    123.7   282.7
   6.0873    332(21)       0.002368    123.8   315.6
   6.0883    366(22)       0.002149    123.8   374.6
   6.0893    467(24)       0.001693    123.8   470.2
   6.0903    595(27)       0.001331    123.8   610.1
   6.0913    797(32)       0.000988    123.8   791.9
   6.0923    1047(36)      0.000754    124.    998.
   6.0933    1347(41)      0.000585    124.    1189.
   6.0943    1597(45)      0.000493    124.    1310.
   6.0953    1559(45)      0.000504    124.    1311.
   6.0963    1374(42)      0.000571    124.    1193.
   6.0973    1108(37)      0.000712    124.    1002.
   6.0983    824(32)       0.000955    123.8   795.8
   6.0993    568(27)       0.001393    123.8   612.2
   6.1003    450(24)       0.001761    123.8   470.2
   6.1013    351(21)       0.002239    123.8   372.3
   6.1023    325(20)       0.002404    123.8   311.0
   6.1033    300(19)       0.002631    123.8   275.2
   6.1043    260(18)       0.003023    123.8   255.0
   6.1053    242(18)       0.003252    123.8   243.3
   6.1063    257(18)       0.003069    123.8   236.0
   6.1073    232(17)       0.003396    123.8   231.0
   6.1083    199(16)       0.00398     123.8   227.2
   6.1093    228(17)       0.003463    123.8   224.2
   6.1103    225(17)       0.003498    123.8   221.8
   6.1113    204(16)       0.00386     123.8   219.7
   6.1123    211(16)       0.00375     123.8   218.0
   6.1133    171(15)       0.00461     123.8   216.5
   6.1143    209(16)       0.00377     123.9   215.2
   6.1153    214(16)       0.00370     123.9   214.1
   6.1163    177(15)       0.00449     123.9   213.1
   6.1173    194(16)       0.00406     123.9   212.3
   6.1183    198(16)       0.00398     123.9   211.5
   6.1193    187(15)       0.00418     123.9   210.9
   6.1203    189(16)       0.00414     123.9   210.3
   6.1213    170(15)       0.00468     123.9   209.8
   6.1223    176(15)       0.00450     123.9   209.3
   6.1233    184(15)       0.00433     123.9   208.9
   6.1243    181(15)       0.00439     123.9   208.5
   6.1253    221(17)       0.00356     123.9   208.2
   6.1263    188(15)       0.00418     123.9   207.9
   6.1273    209(16)       0.00375     123.9   207.6
   6.1283    192(16)       0.00411     123.9   207.4
   6.1293    192(16)       0.00409     123.9   207.2
   6.1303    168(15)       0.00473     123.9   207.0
   6.1313    196(16)       0.00401     123.9   206.9
   6.1323    200(16)       0.00389     123.9   206.8
   6.1333    205(16)       0.00388     123.9   206.7
   6.1343    192(16)       0.00409     123.9   206.6
   6.1353    206(16)       0.00379     123.9   206.6
   6.1363    212(16)       0.00371     123.9   206.6
   6.1373    199(16)       0.00397     123.9   206.6
   6.1383    194(16)       0.00410     123.9   206.7
   6.1393    186(15)       0.00425     123.9   206.8
   6.1403    182(15)       0.00431     124.0   207.0
   6.1413    216(17)       0.00365     124.0   207.2
   6.1423    198(16)       0.00397     124.0   207.6
   6.1433    200(16)       0.00394     124.0   208.0
   6.1443    191(16)       0.00413     124.0   208.7
   6.1453    198(16)       0.00396     124.0   209.6
   6.1463    197(16)       0.00396     124.0   211.0
   6.1473    189(15)       0.00418     124.0   213.5
   6.1483    189(15)       0.00422     124.0   218.1
   6.1493    226(17)       0.003473    124.0   226.6
   6.1503    218(17)       0.00362     124.0   241.4
   6.1513    237(17)       0.003308    124.0   265.0
   6.1523    260(18)       0.003026    124.0   298.7
   6.1533    307(20)       0.002577    124.0   340.9
   6.1543    362(21)       0.002178    124.0   385.5
   6.1553    426(23)       0.001845    124.0   421.8
   6.1563    455(24)       0.001729    124.0   436.8
   6.1573    434(23)       0.001814    124.0   423.4
   6.1583    356(21)       0.002206    124.0   387.9
   6.1593    309(20)       0.002560    124.0   343.2
   6.1603    260(18)       0.003040    124.0   300.4
   6.1613    274(19)       0.002890    124.0   265.9
   6.1623    222(17)       0.00355     124.0   241.5
   6.1633    202(16)       0.00389     124.0   226.0
   6.1643    194(16)       0.00407     124.0   217.0
   6.1653    188(15)       0.00422     124.0   212.0
   6.1663    201(16)       0.00394     124.0   209.2
   6.1673    217(17)       0.00364     124.1   207.6
   6.1683    187(15)       0.00420     124.1   206.4
   6.1693    223(17)       0.003505    124.1   205.6
   6.1703    215(17)       0.00365     124.1   204.9
   6.1713    211(16)       0.00376     124.1   204.4
   6.1723    201(16)       0.00394     124.1   203.9
   6.1733    188(15)       0.00419     124.1   203.5
   6.1743    207(16)       0.00379     124.1   203.1
   6.1753    205(16)       0.00384     124.1   202.8
   6.1763    205(16)       0.00383     124.1   202.5
   6.1773    208(16)       0.00385     124.1   201.6
   6.1783    190(16)       0.00414     124.1   201.4
   6.1793    188(15)       0.00421     124.1   201.3
   6.1803    184(15)       0.00428     124.1   201.1
   6.1813    185(15)       0.00424     124.1   200.9
   6.1823    192(16)       0.00412     124.1   200.8
   6.1833    174(15)       0.00452     124.1   200.7
   6.1843    166(15)       0.00475     124.1   200.5
   6.1853    191(16)       0.00411     124.1   200.4
   6.1863    190(15)       0.00417     124.1   200.3
   6.1873    185(15)       0.00428     124.1   200.2
   6.1883    183(15)       0.00430     124.1   200.1
   6.1893    213(16)       0.00372     124.1   200.0
   6.1903    191(16)       0.00414     124.1   199.9
   6.1913    214(16)       0.00369     124.1   199.8
   6.1923    193(16)       0.00407     124.1   199.7
   6.1933    181(15)       0.00436     124.1   199.7
   6.1943    207(16)       0.00380     124.2   199.6
   6.1953    212(16)       0.00370     124.2   199.5
   6.1963    186(15)       0.00428     124.2   199.4
   6.1973    191(16)       0.00416     124.2   199.4
   6.1983    180(15)       0.00435     124.2   199.3
   6.1993    175(15)       0.00443     124.2   199.2
   6.2003    189(15)       0.00420     124.2   199.2
   6.2013    179(15)       0.00439     124.2   199.1
   6.2023    185(15)       0.00424     124.2   199.0
   6.2033    208(16)       0.00379     124.2   199.0
   6.2043    197(16)       0.00403     124.2   198.9
   6.2053    176(15)       0.00448     124.2   198.9
   6.2063    191(16)       0.00410     124.2   198.8
   6.2073    199(16)       0.00400     124.2   198.7
   6.2083    199(16)       0.00397     124.2   198.7
   6.2093    190(15)       0.00417     124.2   198.6
   6.2103    185(15)       0.00430     124.2   198.6
   6.2113    184(15)       0.00430     124.2   198.5
   6.2123    191(16)       0.00412     124.2   198.5
   6.2133    193(16)       0.00409     124.2   198.4
   6.2143    190(15)       0.00416     124.2   198.3
   6.2153    198(16)       0.00397     124.2   198.3
   6.2163    206(16)       0.00383     124.2   198.2
   6.2173    174(15)       0.00458     124.2   198.2
   6.2183    178(15)       0.00442     124.2   198.1
   6.2193    177(15)       0.00444     124.2   198.1
   6.2203    177(15)       0.00447     124.2   198.0
   6.2213    177(15)       0.00447     124.3   198.0
   6.2223    190(16)       0.00415     124.3   197.9
   6.2233    188(15)       0.00417     124.3   197.9
   6.2243    189(16)       0.00413     124.3   197.8
   6.2253    170(15)       0.00465     124.3   197.8
   6.2263    173(15)       0.00457     124.3   197.7
   6.2273    206(16)       0.00381     124.3   197.7
   6.2283    186(15)       0.00423     124.3   197.6
   6.2293    191(16)       0.00411     124.3   197.6
   6.2303    198(16)       0.00393     124.3   197.5
   6.2313    204(16)       0.00386     124.3   197.5
   6.2323    183(15)       0.00433     124.3   197.4
   6.2333    188(15)       0.00423     124.3   197.4
   6.2343    179(15)       0.00445     124.3   197.3
   6.2353    196(16)       0.00401     124.3   197.3
   6.2363    211(16)       0.00371     124.3   197.2
   6.2373    202(16)       0.00390     124.3   197.2
   6.2383    165(14)       0.00476     124.3   197.0
   6.2393    193(16)       0.00410     124.3   197.0
   6.2403    199(16)       0.00396     124.3   196.9
   6.2413    179(15)       0.00441     124.3   196.9
   6.2423    200(16)       0.00396     124.3   196.8
   6.2433    198(16)       0.00400     124.3   196.8
   6.2443    189(15)       0.00420     124.3   196.7
   6.2453    198(16)       0.00398     124.3   196.7
   6.2463    184(15)       0.00432     124.3   196.6
   6.2473    177(15)       0.00448     124.3   196.6
   6.2483    181(15)       0.00433     124.4   196.6
   6.2493    208(16)       0.00377     124.4   196.5
   6.2503    194(16)       0.00405     124.4   196.5
   6.2513    203(16)       0.00393     124.4   196.4
   6.2523    200(16)       0.00398     124.4   196.4
   6.2533    202(16)       0.00393     124.4   196.3
   6.2543    172(15)       0.00457     124.4   196.3
   6.2553    185(15)       0.00429     124.4   196.2
   6.2563    199(16)       0.00395     124.4   196.2
   6.2573    188(15)       0.00419     124.4   196.2
   6.2583    186(15)       0.00425     124.4   196.1
   6.2593    188(15)       0.00420     124.4   196.1
   6.2603    177(15)       0.00446     124.4   196.0
   6.2613    219(17)       0.00359     124.4   196.0
   6.2623    201(16)       0.00392     124.4   195.9
   6.2633    209(16)       0.00377     124.4   195.9
   6.2643    181(15)       0.00434     124.4   195.8
   6.2653    204(16)       0.00386     124.4   207.8
   6.2663    195(16)       0.00403     124.4   208.1
   6.2673    206(16)       0.00382     124.4   208.4
   6.2683    175(15)       0.00449     124.4   208.8
   6.2693    192(16)       0.00408     124.4   209.1
   6.2703    209(16)       0.00374     124.4   209.5
   6.2713    180(15)       0.00440     124.4   209.8
   6.2723    174(15)       0.00456     124.4   210.2
   6.2733    190(16)       0.00416     124.4   210.6
   6.2743    209(16)       0.00378     124.4   211.1
   6.2753    201(16)       0.00390     124.5   211.5
   6.2763    212(16)       0.00372     124.5   212.0
   6.2773    188(15)       0.00419     124.5   212.5
   6.2783    168(15)       0.00467     124.5   213.1
   6.2793    185(15)       0.00424     124.5   213.6
   6.2803    203(16)       0.00387     124.5   214.2
   6.2813    207(16)       0.00381     124.5   214.9
   6.2823    202(16)       0.00391     124.5   215.6
   6.2833    214(17)       0.00366     124.5   216.3
   6.2843    221(17)       0.00357     124.5   217.0
   6.2853    211(16)       0.00375     124.5   217.8
   6.2863    212(16)       0.00371     124.5   218.7
   6.2873    205(16)       0.00384     124.5   219.6
   6.2883    215(16)       0.00368     124.5   220.5
   6.2893    216(17)       0.00364     124.5   221.5
   6.2903    212(16)       0.00373     124.5   222.6
   6.2913    211(16)       0.00375     124.5   223.8
   6.2923    179(15)       0.00442     124.5   225.0
   6.2933    211(16)       0.00375     124.5   226.4
   6.2943    230(17)       0.003428    124.5   227.8
   6.2953    224(17)       0.003488    124.5   229.3
   6.2963    240(18)       0.003260    124.5   230.9
   6.2973    213(16)       0.00371     124.5   232.7
   6.2983    205(16)       0.00384     124.5   234.6
   6.2993    224(17)       0.00352     124.5   236.6
   6.3003    217(17)       0.00364     124.5   238.9
   6.3013    218(17)       0.00361     124.5   241.3
   6.3023    218(17)       0.00360     124.6   243.9
   6.3033    227(17)       0.003476    124.6   246.7
   6.3043    218(17)       0.00360     124.6   249.8
   6.3053    255(18)       0.003082    124.6   253.2
   6.3063    224(17)       0.003506    124.6   256.9
   6.3073    225(17)       0.003500    124.6   260.9
   6.3083    252(18)       0.003135    124.6   265.4
   6.3093    258(18)       0.003042    124.6   270.4
   6.3103    249(18)       0.003161    124.6   275.9
   6.3113    245(18)       0.003209    124.6   282.0
   6.3123    252(18)       0.003115    124.6   288.8
   6.3133    265(18)       0.002970    124.6   296.5
   6.3143    266(18)       0.002959    124.6   305.1
   6.3153    282(19)       0.002793    124.6   314.8
   6.3163    309(20)       0.002548    124.6   325.9
   6.3173    310(20)       0.002535    124.6   338.6
   6.3183    324(20)       0.002424    124.6   353.1
   6.3193    320(20)       0.002471    124.6   370.0
   6.3203    325(20)       0.002427    124.6   389.7
   6.3213    337(21)       0.002337    124.6   412.8
   6.3223    388(22)       0.002021    124.6   440.2
   6.3233    475(25)       0.001652    124.6   473.2
   6.3243    517(26)       0.001520    124.6   514.1
   6.3253    575(27)       0.001369    124.6   567.0
   6.3263    665(29)       0.001188    124.6   640.1
   6.3273    837(33)       0.000944    124.6   749.8
   6.3283    1070(37)      0.000738    125.    927.
   6.3293    1379(42)      0.000573    125.    1224.
   6.3303    1884(49)      0.000420    125.    1719.
   6.3313    2433(56)      0.0003242   125.    2508.
   6.3323    3403(66)      0.0002323   125.    3684.
   6.3333    4799(78)      0.0001652   125.    5290.
   6.3343    6738(92)      0.0001174   125.    7273.
   6.3353    9450(110)     0.0000834   125.    9433.
   6.3363    11520(120)    0.0000682   125.    11399.
   6.3373    13150(130)    0.0000597   125.    12654.
   6.3383    13450(130)    0.0000583   125.    12745.
   6.3393    12030(120)    0.0000653   125.    11633.
   6.3403    9720(110)     0.0000809   125.    9732.
   6.3413    7194(96)      0.0001095   125.    7573.
   6.3423    5054(80)      0.0001561   125.    5549.
   6.3433    3594(67)      0.0002200   125.    3884.
   6.3443    2655(58)      0.0002972   125.    2649.
   6.3453    1854(48)      0.000426    125.    1810.
   6.3463    1353(41)      0.000583    125.    1302.
   6.3473    1108(37)      0.000712    125.    983.
   6.3483    961(35)       0.000822    124.7   792.9
   6.3493    761(31)       0.001037    124.7   676.5
   6.3503    609(28)       0.001298    124.7   600.1
   6.3513    581(27)       0.001354    124.7   545.7
   6.3523    483(25)       0.001631    124.7   504.1
   6.3533    464(24)       0.001704    124.7   470.8
   6.3543    387(22)       0.002038    124.7   443.5
   6.3553    404(23)       0.001954    124.7   420.7
   6.3563    384(22)       0.002062    124.8   401.5
   6.3573    348(21)       0.002257    124.8   385.2
   6.3583    350(21)       0.002256    124.8   371.3
   6.3593    340(21)       0.002323    124.8   359.4
   6.3603    311(20)       0.002540    124.8   349.2
   6.3613    321(20)       0.002453    124.8   340.4
   6.3623    300(20)       0.002630    124.8   332.8
   6.3633    281(19)       0.002810    124.8   326.3
   6.3643    275(19)       0.002879    124.8   320.7
   6.3653    278(19)       0.002844    124.8   315.9
   6.3663    274(19)       0.002885    124.8   311.9
   6.3673    261(18)       0.003012    124.8   308.5
   6.3683    284(19)       0.002768    124.8   305.6
   6.3693    285(19)       0.002769    124.8   303.3
   6.3703    251(18)       0.003129    124.8   301.5
   6.3713    268(18)       0.002927    124.8   300.2
   6.3723    255(18)       0.003070    124.8   299.2
   6.3733    255(18)       0.003068    124.8   298.7
   6.3743    230(17)       0.003449    124.8   298.6
   6.3753    253(18)       0.003133    124.8   298.9
   6.3763    290(19)       0.002731    124.8   299.6
   6.3773    262(18)       0.003039    124.8   300.6
   6.3783    256(18)       0.003095    124.8   302.1
   6.3793    261(18)       0.003024    124.8   304.0
   6.3803    250(18)       0.003161    124.8   306.2
   6.3813    272(19)       0.002892    124.8   308.9
   6.3823    279(19)       0.002817    124.8   312.1
   6.3833    285(19)       0.002767    124.8   315.8
   6.3843    295(19)       0.002668    124.9   320.0
   6.3853    290(19)       0.002714    124.9   324.8
   6.3863    314(20)       0.002517    124.9   330.2
   6.3873    303(20)       0.002596    124.9   336.3
   6.3883    321(20)       0.002461    124.9   343.2
   6.3893    318(20)       0.002471    124.9   351.0
   6.3903    328(20)       0.002399    124.9   359.8
   6.3913    326(20)       0.002419    124.9   369.6
   6.3923    370(22)       0.002140    124.9   380.8
   6.3933    388(22)       0.002032    124.9   393.4
   6.3943    393(22)       0.002007    124.9   407.7
   6.3953    401(23)       0.001959    124.9   423.9
   6.3963    434(24)       0.001810    124.9   442.5
   6.3973    438(24)       0.001789    124.9   463.7
   6.3983    452(24)       0.001747    124.9   488.2
   6.3993    481(25)       0.001642    124.9   516.5
   6.4003    529(26)       0.001490    124.9   549.5
   6.4013    586(27)       0.001342    124.9   588.2
   6.4023    586(27)       0.001346    124.9   634.0
   6.4033    696(30)       0.001132    124.9   688.8
   6.4043    783(31)       0.001009    124.9   755.6
   6.4053    910(34)       0.000869    124.9   840.0
   6.4063    1113(38)      0.000709    125.    952.
   6.4073    1278(40)      0.000617    125.    1114.
   6.4083    1570(45)      0.000503    125.    1365.
   6.4093    2053(51)      0.000385    125.    1781.
   6.4103    2691(58)      0.0002936   125.    2479.
   6.4113    3664(68)      0.0002158   125.    3626.
   6.4123    5143(81)      0.0001541   125.    5405.
   6.4133    7425(97)      0.0001067   125.    7956.
   6.4143    10260(110)    0.0000772   125.    11291.
   6.4153    14410(140)    0.0000549   125.    15197.
   6.4163    18950(160)    0.0000416   125.    19151.
   6.4173    22980(170)    0.0000342   125.    22319.
   6.4183    25350(180)    0.0000310   125.    23713.
   6.4193    24630(180)    0.0000319   125.    22783.
   6.4203    21180(160)    0.0000372   125.    19894.
   6.4213    16320(140)    0.0000483   125.    16024.
   6.4223    12030(120)    0.0000656   125.    12057.
   6.4233    8400(100)     0.0000942   125.    8576.
   6.4243    5662(85)      0.0001400   125.    5856.
   6.4253    4080(72)      0.0001941   125.    3925.
   6.4263    3043(62)      0.0002600   125.    2662.
   6.4273    2190(53)      0.000362    125.    1884.
   6.4283    1693(46)      0.000467    125.    1421.
   6.4293    1363(41)      0.000583    125.    1142.
   6.4303    1103(37)      0.000718    125.    966.
   6.4313    971(35)       0.000817    125.0   845.6
   6.4323    848(33)       0.000932    125.0   756.1
   6.4333    730(30)       0.001083    125.0   685.7
   6.4343    640(28)       0.001238    125.0   628.1
   6.4353    588(27)       0.001347    125.0   580.1
   6.4363    560(27)       0.001411    125.0   539.4
   6.4373    501(25)       0.001581    125.0   504.8
   6.4383    453(24)       0.001757    125.0   475.0
   6.4393    416(23)       0.001903    125.1   449.1
   6.4403    409(23)       0.001931    125.1   426.5
   6.4413    379(22)       0.002082    125.1   406.7
   6.4423    370(22)       0.002131    125.1   389.3
   6.4433    375(22)       0.002104    125.1   373.8
   6.4443    355(21)       0.002218    125.1   360.1
   6.4453    317(20)       0.002492    125.1   347.8
   6.4463    332(20)       0.002380    125.1   336.8
   6.4473    305(20)       0.002598    125.1   326.8
   6.4483    323(20)       0.002442    125.1   317.8
   6.4493    319(20)       0.002475    125.1   309.7
   6.4503    288(19)       0.002752    125.1   302.3
   6.4513    279(19)       0.002819    125.1   295.5
   6.4523    283(19)       0.002784    125.1   289.3
   6.4533    274(19)       0.002887    125.1   283.6
   6.4543    268(18)       0.002953    125.1   278.4
   6.4553    263(18)       0.003015    125.1   273.6
   6.4563    253(18)       0.003131    125.1   269.2
   6.4573    258(18)       0.003084    125.1   265.1
   6.4583    256(18)       0.003074    125.1   261.2
   6.4593    262(18)       0.003012    125.1   257.7
   6.4603    243(18)       0.003248    125.1   254.4
   6.4613    240(17)       0.003276    125.1   251.3
   6.4623    266(18)       0.002941    125.1   248.5
   6.4633    269(19)       0.002922    125.1   245.8
   6.4643    261(18)       0.003046    125.1   243.3
   6.4653    219(17)       0.00359     125.1   240.9
   6.4663    246(18)       0.003220    125.1   238.7
   6.4673    247(18)       0.003191    125.2   236.6
   6.4683    224(17)       0.00352     125.2   234.6
   6.4693    243(17)       0.003277    125.2   232.8
   6.4703    234(17)       0.003366    125.2   231.0
   6.4713    243(18)       0.003244    125.2   229.4
   6.4723    258(18)       0.003059    125.2   227.8
   6.4733    235(17)       0.003343    125.2   226.3
   6.4743    205(16)       0.00388     125.2   224.9
   6.4753    223(17)       0.00352     125.2   223.6
   6.4763    240(17)       0.003291    125.2   222.3
   6.4773    227(17)       0.003458    125.2   221.1
   6.4783    216(16)       0.00367     125.2   219.9
   6.4793    220(17)       0.00364     125.2   218.9
   6.4803    190(16)       0.00412     125.2   217.8
   6.4813    216(16)       0.00369     125.2   216.8
   6.4823    245(18)       0.003238    125.2   215.9
   6.4833    220(17)       0.00360     125.2   214.9
   6.4843    222(17)       0.00360     125.2   214.1
   6.4853    220(17)       0.00361     125.2   213.2
   6.4863    210(16)       0.00378     125.2   212.4
   6.4873    213(16)       0.00370     125.2   211.7
   6.4883    225(17)       0.003502    125.2   210.9
   6.4893    233(17)       0.003408    125.2   210.2
   6.4903    220(17)       0.00359     125.2   209.6
   6.4913    224(17)       0.00352     125.2   208.9
   6.4923    208(16)       0.00380     125.2   208.3
   6.4933    195(16)       0.00403     125.2   207.7
   6.4943    200(16)       0.00392     125.2   207.1
   6.4953    206(16)       0.00381     125.3   206.5
   6.4963    216(17)       0.00364     125.3   206.0
   6.4973    214(16)       0.00368     125.3   205.5
   6.4983    213(16)       0.00372     125.3   205.0
   6.4993    210(16)       0.00376     125.3   204.5
   6.5003    227(17)       0.003480    125.3   204.0
   6.5013    231(17)       0.003427    125.3   186.5
   6.5023    206(16)       0.00382     125.3   186.4
   6.5033    221(17)       0.00356     125.3   186.4
   6.5043    203(16)       0.00389     125.3   186.4
   6.5053    183(15)       0.00431     125.3   186.3
   6.5063    201(16)       0.00392     125.3   186.3
   6.5073    189(16)       0.00416     125.3   186.3
   6.5083    210(16)       0.00376     125.3   186.2
   6.5093    204(16)       0.00384     125.3   186.2
   6.5103    222(17)       0.00353     125.3   186.2
   6.5113    220(17)       0.00358     125.3   186.1
   6.5123    207(16)       0.00380     125.3   186.1
   6.5133    195(16)       0.00405     125.3   186.0
   6.5143    181(15)       0.00437     125.3   186.0
   6.5153    209(16)       0.00380     125.3   186.0
   6.5163    188(15)       0.00425     125.3   185.9
   6.5173    201(16)       0.00396     125.3   185.9
   6.5183    187(15)       0.00422     125.3   185.9
   6.5193    186(15)       0.00423     125.3   185.8
   6.5203    195(16)       0.00405     125.3   185.8
   6.5213    185(15)       0.00423     125.3   185.8
   6.5223    193(16)       0.00405     125.4   185.7
   6.5233    192(16)       0.00407     125.4   185.7
   6.5243    180(15)       0.00440     125.4   185.7
   6.5253    190(15)       0.00421     125.4   185.6
   6.5263    210(16)       0.00377     125.4   185.6
   6.5273    190(16)       0.00414     125.4   185.6
   6.5283    190(16)       0.00415     125.4   185.5
   6.5293    193(16)       0.00407     125.4   185.5
   6.5303    188(15)       0.00419     125.4   185.5
   6.5313    197(16)       0.00399     125.4   185.4
   6.5323    204(16)       0.00386     125.4   185.4
   6.5333    210(16)       0.00377     125.4   185.4
   6.5343    190(16)       0.00415     125.4   185.3
   6.5353    187(15)       0.00419     125.4   185.3
   6.5363    206(16)       0.00384     125.4   185.3
   6.5373    187(15)       0.00423     125.4   185.2
   6.5383    187(15)       0.00421     125.4   185.2
   6.5393    185(15)       0.00426     125.4   185.2
   6.5403    193(16)       0.00412     125.4   185.1
   6.5413    177(15)       0.00444     125.4   185.1
   6.5423    191(16)       0.00411     125.4   185.1
   6.5433    205(16)       0.00382     125.4   185.0
   6.5443    185(15)       0.00425     125.4   185.0
   6.5453    196(16)       0.00403     125.4   185.0
   6.5463    222(17)       0.00351     125.4   184.9
   6.5473    213(16)       0.00370     125.4   184.9
   6.5483    234(17)       0.003374    125.4   184.9
   6.5493    234(17)       0.003368    125.4   184.8
   6.5503    192(16)       0.00409     125.4   184.8
   6.5513    182(15)       0.00428     125.5   184.8
   6.5523    182(15)       0.00431     125.5   184.7
   6.5533    174(15)       0.00447     125.5   184.7
   6.5543    182(15)       0.00437     125.5   184.7
   6.5553    182(15)       0.00438     125.5   186.4
   6.5563    178(15)       0.00446     125.5   186.5
   6.5573    180(15)       0.00440     125.5   186.5
   6.5583    178(15)       0.00445     125.5   186.5
   6.5593    187(15)       0.00424     125.5   186.5
   6.5603    179(15)       0.00442     125.5   186.6
   6.5613    189(16)       0.00414     125.5   186.6
   6.5623    190(16)       0.00414     125.5   186.6
   6.5633    187(15)       0.00422     125.5   186.7
   6.5643    207(16)       0.00384     125.5   186.7
   6.5653    187(15)       0.00423     125.5   186.7
   6.5663    191(16)       0.00415     125.5   186.8
   6.5673    203(16)       0.00386     125.5   186.8
   6.5683    176(15)       0.00449     125.5   186.9
   6.5693    172(15)       0.00455     125.5   187.0
   6.5703    183(15)       0.00428     125.5   187.0
   6.5713    187(15)       0.00423     125.5   187.1
   6.5723    192(16)       0.00411     125.5   187.2
   6.5733    190(16)       0.00413     125.5   187.3
   6.5743    197(16)       0.00401     125.5   187.3
   6.5753    180(15)       0.00442     125.5   187.4
   6.5763    187(15)       0.00423     125.5   187.5
   6.5773    197(16)       0.00400     125.5   187.7
   6.5783    204(16)       0.00391     125.5   187.8
   6.5793    187(15)       0.00425     125.6   187.9
   6.5803    206(16)       0.00386     125.6   188.1
   6.5813    187(15)       0.00421     125.6   188.2
   6.5823    202(16)       0.00391     125.6   188.7
   6.5833    180(15)       0.00437     125.6   188.9
   6.5843    177(15)       0.00449     125.6   189.1
   6.5853    191(16)       0.00411     125.6   189.3
   6.5863    200(16)       0.00393     125.6   190.6
   6.5873    180(15)       0.00433     125.6   190.9
   6.5883    200(16)       0.00394     125.6   191.2
   6.5893    195(16)       0.00408     125.6   191.5
   6.5903    176(15)       0.00451     125.6   191.9
   6.5913    191(16)       0.00411     125.6   192.3
   6.5923    190(16)       0.00413     125.6   192.7
   6.5933    187(15)       0.00420     125.6   193.2
   6.5943    212(16)       0.00371     125.6   193.7
   6.5953    203(16)       0.00388     125.6   194.3
   6.5963    207(16)       0.00381     125.6   194.9
   6.5973    191(16)       0.00415     125.6   195.6
   6.5983    202(16)       0.00391     125.6   196.3
   6.5993    205(16)       0.00385     125.6   197.1
   6.6003    194(16)       0.00411     125.6   198.0
   6.6013    217(17)       0.00366     125.6   199.1
   6.6023    214(16)       0.00369     125.6   200.2
   6.6033    186(15)       0.00425     125.6   201.5
   6.6043    169(15)       0.00464     125.6   202.9
   6.6053    183(15)       0.00431     125.6   204.6
   6.6063    199(16)       0.00397     125.6   206.4
   6.6073    207(16)       0.00381     125.7   208.6
   6.6083    239(17)       0.003288    125.7   211.0
   6.6093    230(17)       0.003471    125.7   213.9
   6.6103    243(17)       0.003282    125.7   217.2
   6.6113    229(17)       0.003431    125.7   221.2
   6.6123    212(16)       0.00375     125.7   225.8
   6.6133    244(18)       0.003246    125.7   231.5
   6.6143    252(18)       0.003127    125.7   238.4
   6.6153    271(19)       0.002921    125.7   247.2
   6.6163    289(19)       0.002726    125.7   259.1
   6.6173    295(19)       0.002670    125.7   276.8
   6.6183    288(19)       0.002742    125.7   306.4
   6.6193    354(21)       0.002239    125.7   360.0
   6.6203    418(23)       0.001890    125.7   458.7
   6.6213    496(25)       0.001597    125.7   632.5
   6.6223    670(29)       0.001180    125.7   913.4
   6.6233    936(34)       0.000846    125.7   1318.5
   6.6243    1452(43)      0.000547    126.    1829.
   6.6253    2113(52)      0.000375    126.    2374.
   6.6263    2782(59)      0.0002834   126.    2820.
   6.6273    3418(66)      0.0002299   126.    3006.
   6.6283    3319(65)      0.0002369   126.    2844.
   6.6293    2811(60)      0.0002808   126.    2412.
   6.6303    2025(51)      0.000391    126.    1870.
   6.6313    1338(41)      0.000593    126.    1355.
   6.6323    834(32)       0.000952    125.7   942.5
   6.6333    584(27)       0.001354    125.7   654.7
   6.6343    460(24)       0.001723    125.7   476.0
   6.6353    394(22)       0.002019    125.8   374.6
   6.6363    326(20)       0.002424    125.8   320.3
   6.6373    331(20)       0.002396    125.8   291.4
   6.6383    312(20)       0.002520    125.8   275.2
   6.6393    290(19)       0.002707    125.8   265.4
   6.6403    276(19)       0.002869    125.8   259.1
   6.6413    261(18)       0.003025    125.8   255.4
   6.6423    249(18)       0.003165    125.8   253.7
   6.6433    235(17)       0.003378    125.8   254.2
   6.6443    255(18)       0.003117    125.8   257.6
   6.6453    260(18)       0.003031    125.8   265.1
   6.6463    269(18)       0.002948    125.8   279.1
   6.6473    316(20)       0.002500    125.8   302.7
   6.6483    342(21)       0.002304    125.8   340.2
   6.6493    398(22)       0.001976    125.8   396.1
   6.6503    510(25)       0.001549    125.8   475.0
   6.6513    601(28)       0.001318    125.8   581.1
   6.6523    742(31)       0.001062    125.8   716.8
   6.6533    888(34)       0.000889    125.8   880.5
   6.6543    1037(36)      0.000759    126.    1065.
   6.6553    1237(40)      0.000637    126.    1260.
   6.6563    1499(44)      0.000525    126.    1451.
   6.6573    1753(47)      0.000449    126.    1608.
   6.6583    1900(49)      0.000414    126.    1677.
   6.6593    1865(49)      0.000422    126.    1613.
   6.6603    1638(46)      0.000481    126.    1423.
   6.6613    1245(40)      0.000635    126.    1166.
   6.6623    942(35)       0.000833    125.8   904.8
   6.6633    707(30)       0.001122    125.8   680.5
   6.6643    484(25)       0.001639    125.9   510.7
   6.6653    414(23)       0.001909    125.9   395.0
   6.6663    346(21)       0.002278    125.9   323.0
   6.6673    296(19)       0.002664    125.9   280.7
   6.6683    268(18)       0.002967    125.9   256.5
   6.6693    272(19)       0.002911    125.9   242.1
   6.6703    239(17)       0.003301    125.9   233.0
   6.6713    237(17)       0.003354    125.9   226.5
   6.6723    242(18)       0.003242    125.9   221.6
   6.6733    221(17)       0.00355     125.9   217.7
   6.6743    210(16)       0.00377     125.9   214.6
   6.6753    244(18)       0.003243    125.9   212.0
   6.6763    231(17)       0.003423    125.9   209.9
   6.6773    187(15)       0.00421     125.9   208.1
   6.6783    216(17)       0.00363     125.9   206.8
   6.6793    210(16)       0.00374     125.9   205.7
   6.6803    218(17)       0.00362     125.9   204.9
   6.6813    199(16)       0.00394     125.9   204.3
   6.6823    191(16)       0.00412     125.9   204.1
   6.6833    201(16)       0.00393     125.9   204.0
   6.6843    212(16)       0.00373     125.9   204.3
   6.6853    212(16)       0.00373     125.9   204.9
   6.6863    215(17)       0.00366     125.9   205.9
   6.6873    212(16)       0.00370     125.9   207.5
   6.6883    226(17)       0.003463    125.9   209.7
   6.6893    202(16)       0.00389     125.9   213.3
   6.6903    211(16)       0.00373     125.9   219.4
   6.6913    228(17)       0.003469    125.9   230.4
   6.6923    242(18)       0.003257    126.0   250.2
   6.6933    277(19)       0.002844    126.0   285.0
   6.6943    292(19)       0.002701    126.0   341.5
   6.6953    368(22)       0.002151    126.0   425.4
   6.6963    462(24)       0.001716    126.0   536.2
   6.6973    635(28)       0.001242    126.0   664.0
   6.6983    807(32)       0.000975    126.0   786.3
   6.6993    916(34)       0.000860    126.0   869.1
   6.7003    928(34)       0.000848    126.0   879.8
   6.7013    880(33)       0.000896    126.0   813.3
   6.7023    690(30)       0.001143    126.0   697.5
   6.7033    518(26)       0.001526    126.0   567.8
   6.7043    396(22)       0.001998    126.0   450.5
   6.7053    324(20)       0.002432    126.0   358.4
   6.7063    300(20)       0.002628    126.0   294.3
   6.7073    271(19)       0.002911    126.0   253.7
   6.7083    255(18)       0.003078    126.0   229.9
   6.7093    233(17)       0.003370    126.0   216.4
   6.7103    219(17)       0.00361     126.0   207.3
   6.7113    220(17)       0.00358     126.0   202.5
   6.7123    197(16)       0.00401     126.0   199.2
   6.7133    206(16)       0.00381     126.0   196.7
   6.7143    205(16)       0.00385     126.0   194.7
   6.7153    192(16)       0.00412     126.0   193.1
   6.7163    196(16)       0.00404     126.0   191.8
   6.7173    196(16)       0.00402     126.0   190.6
   6.7183    200(16)       0.00395     126.0   189.6
   6.7193    182(15)       0.00434     126.0   188.7
   6.7203    163(14)       0.00484     126.0   188.0
   6.7213    180(15)       0.00443     126.1   187.3
   6.7223    203(16)       0.00387     126.1   186.8
   6.7233    212(16)       0.00372     126.1   186.2
   6.7243    203(16)       0.00392     126.1   185.8
   6.7253    206(16)       0.00383     126.1   185.3
   6.7263    187(15)       0.00422     126.1   185.0
   6.7273    213(16)       0.00370     126.1   184.6
   6.7283    198(16)       0.00401     126.1   184.3
   6.7293    187(15)       0.00423     126.1   184.0
   6.7303    182(15)       0.00427     126.1   183.7
   6.7313    187(15)       0.00420     126.1   183.5
   6.7323    183(15)       0.00431     126.1   183.3
   6.7333    191(16)       0.00415     126.1   183.1
   6.7343    180(15)       0.00442     126.1   182.9
   6.7353    191(16)       0.00414     126.1   182.7
   6.7363    174(15)       0.00452     126.1   182.5
   6.7373    177(15)       0.00445     126.1   182.1
   6.7383    201(16)       0.00391     126.1   181.9
   6.7393    196(16)       0.00402     126.1   181.8
   6.7403    199(16)       0.00400     126.1   181.6
   6.7413    164(14)       0.00485     126.1   180.7
   6.7423    180(15)       0.00437     126.1   180.6
   6.7433    185(15)       0.00425     126.1   180.5
   6.7443    187(15)       0.00419     126.1   180.4
   6.7453    179(15)       0.00439     126.1   180.4
   6.7463    173(15)       0.00458     126.1   180.3
   6.7473    177(15)       0.00449     126.1   180.2
   6.7483    180(15)       0.00443     126.1   180.1
   6.7493    188(15)       0.00421     126.1   180.0
   6.7503    199(16)       0.00395     126.2   180.0
   6.7513    188(15)       0.00418     126.2   179.9
   6.7523    186(15)       0.00425     126.2   179.8
   6.7533    197(16)       0.00402     126.2   179.8
   6.7543    197(16)       0.00400     126.2   179.7
   6.7553    198(16)       0.00398     126.2   179.7
   6.7563    181(15)       0.00434     126.2   179.6
   6.7573    191(16)       0.00412     126.2   179.5
   6.7583    172(15)       0.00460     126.2   179.5
   6.7593    191(16)       0.00415     126.2   179.4
   6.7603    177(15)       0.00449     126.2   179.4
   6.7613    190(16)       0.00416     126.2   179.3
   6.7623    198(16)       0.00399     126.2   179.3
   6.7633    182(15)       0.00435     126.2   179.2
   6.7643    174(15)       0.00455     126.2   179.2
   6.7653    169(15)       0.00471     126.2   179.1
   6.7663    172(15)       0.00457     126.2   179.1
   6.7673    190(16)       0.00416     126.2   179.1
   6.7683    182(15)       0.00432     126.2   179.0
   6.7693    148(14)       0.00536     126.2   179.0
   6.7703    180(15)       0.00439     126.2   178.9
   6.7713    185(15)       0.00430     126.2   178.9
   6.7723    193(16)       0.00410     126.2   178.8
   6.7733    172(15)       0.00456     126.2   178.8
   6.7743    186(15)       0.00426     126.2   178.8
   6.7753    206(16)       0.00385     126.2   178.7
   6.7763    206(16)       0.00383     126.2   178.7
   6.7773    203(16)       0.00392     126.2   178.6
   6.7783    187(15)       0.00424     126.2   178.6
   6.7793    172(15)       0.00457     126.3   178.6
   6.7803    195(16)       0.00406     126.3   178.5
   6.7813    200(16)       0.00399     126.3   178.5
   6.7823    179(15)       0.00438     126.3   178.1
   6.7833    203(16)       0.00386     126.3   178.0
   6.7843    202(16)       0.00391     126.3   178.0
   6.7853    205(16)       0.00390     126.3   178.0
   6.7863    196(16)       0.00404     126.3   178.0
   6.7873    190(16)       0.00413     126.3   177.9
   6.7883    184(15)       0.00428     126.3   177.9
   6.7893    190(15)       0.00417     126.3   177.9
   6.7903    185(15)       0.00431     126.3   177.9
   6.7913    186(15)       0.00423     126.3   177.8
   6.7923    183(15)       0.00432     126.3   177.8
   6.7933    180(15)       0.00438     126.3   177.8
   6.7943    176(15)       0.00447     126.3   177.8
   6.7953    171(15)       0.00459     126.3   177.7
   6.7962    192(16)       0.00410     126.3   177.7
   6.7973    177(15)       0.00445     126.3   177.7
   6.7983    184(15)       0.00426     126.3   177.7
   6.7993    177(15)       0.00447     126.3   177.6
   6.8003    174(15)       0.00455     126.3   177.6
   6.8013    187(15)       0.00421     126.3   177.6
   6.8022    189(16)       0.00416     126.3   177.6
   6.8032    186(15)       0.00426     126.3   177.5
   6.8042    195(16)       0.00404     126.3   177.5
   6.8052    173(15)       0.00456     126.3   177.5
   6.8062    188(15)       0.00419     126.3   177.5
   6.8072    177(15)       0.00443     126.3   177.4
   6.8082    179(15)       0.00442     126.4   177.4
   6.8092    172(15)       0.00466     126.4   177.4
   6.8102    178(15)       0.00447     126.4   177.4
   6.8112    186(15)       0.00425     126.4   177.3
   6.8122    167(14)       0.00476     126.4   177.3
   6.8132    180(15)       0.00435     126.4   177.3
   6.8142    187(15)       0.00417     126.4   177.3
   6.8152    170(15)       0.00463     126.4   177.2
   6.8162    186(15)       0.00422     126.4   177.2
   6.8172    189(16)       0.00415     126.4   177.2
   6.8182    158(14)       0.00497     126.4   177.2
   6.8192    154(14)       0.00520     126.4   177.1
   6.8202    185(15)       0.00430     126.4   177.1
   6.8212    184(15)       0.00429     126.4   177.1
   6.8222    164(14)       0.00485     126.4   177.1
   6.8232    185(15)       0.00429     126.4   177.0
   6.8242    181(15)       0.00437     126.4   177.0
   6.8252    196(16)       0.00406     126.4   177.0
   6.8262    173(15)       0.00459     126.4   177.0
   6.8272    183(15)       0.00429     126.4   176.9
   6.8282    189(16)       0.00416     126.4   176.9
   6.8292    183(15)       0.00430     126.4   176.9
   6.8302    195(16)       0.00404     126.4   176.9
   6.8312    200(16)       0.00395     126.4   176.8
   6.8322    170(15)       0.00462     126.4   176.8
   6.8332    179(15)       0.00439     126.4   176.8
   6.8342    166(15)       0.00475     126.4   176.8
   6.8352    179(15)       0.00440     126.4   176.7
   6.8362    175(15)       0.00450     126.4   176.7
   6.8372    176(15)       0.00452     126.5   176.7
   6.8382    201(16)       0.00395     126.5   176.7
   6.8392    194(16)       0.00409     126.5   176.7
   6.8402    183(15)       0.00433     126.5   176.6
   6.8412    175(15)       0.00454     126.5   176.6
   6.8422    170(15)       0.00470     126.5   176.6
   6.8432    193(16)       0.00408     126.5   176.6
   6.8442    190(16)       0.00415     126.5   176.5
   6.8452    168(15)       0.00471     126.5   176.5
   6.8462    174(15)       0.00457     126.5   176.5
   6.8472    174(15)       0.00454     126.5   176.5
   6.8482    186(15)       0.00421     126.5   176.4
   6.8492    190(16)       0.00415     126.5   176.4
   6.8502    172(15)       0.00459     126.5   176.4
   6.8512    185(15)       0.00426     126.5   176.4
   6.8522    173(15)       0.00452     126.5   176.3
   6.8532    198(16)       0.00400     126.5   176.3
   6.8542    191(16)       0.00416     126.5   176.3
   6.8552    183(15)       0.00432     126.5   176.3
   6.8562    163(14)       0.00488     126.5   176.2
   6.8572    152(14)       0.00521     126.5   176.2
   6.8582    181(15)       0.00437     126.5   176.2
   6.8592    185(15)       0.00428     126.5   176.2
   6.8602    191(16)       0.00408     126.5   176.2
   6.8612    184(15)       0.00429     126.5   176.1
   6.8622    174(15)       0.00452     126.5   176.1
   6.8632    167(15)       0.00473     126.5   176.1
   6.8642    178(15)       0.00445     126.5   176.1
   6.8652    209(16)       0.00378     126.5   176.0
   6.8662    172(15)       0.00460     126.6   176.0
   6.8672    186(15)       0.00425     126.6   176.0
   6.8682    170(15)       0.00465     126.6   176.0
   6.8692    185(15)       0.00431     126.6   175.9
   6.8702    189(15)       0.00419     126.6   175.9
   6.8712    170(15)       0.00464     126.6   175.9
   6.8722    176(15)       0.00449     126.6   175.9
   6.8732    171(15)       0.00457     126.6   175.9
   6.8742    152(14)       0.00519     126.6   175.8
   6.8752    182(15)       0.00431     126.6   175.8
   6.8762    172(15)       0.00465     126.6   175.8
   6.8772    183(15)       0.00436     126.6   175.8
   6.8782    168(15)       0.00476     126.6   175.7
   6.8792    178(15)       0.00442     126.6   175.7
   6.8802    178(15)       0.00447     126.6   175.7
   6.8812    176(15)       0.00453     126.6   175.7
   6.8822    178(15)       0.00441     126.6   175.6
   6.8832    184(15)       0.00429     126.6   175.6
   6.8842    205(16)       0.00386     126.6   175.6
   6.8852    179(15)       0.00440     126.6   175.6
   6.8862    165(14)       0.00480     126.6   175.6
   6.8872    183(15)       0.00430     126.6   175.5
   6.8882    187(15)       0.00423     126.6   175.5
   6.8892    183(15)       0.00432     126.6   175.5
   6.8902    163(14)       0.00479     126.6   175.5
   6.8912    198(16)       0.00394     126.6   175.4
   6.8922    201(16)       0.00391     126.6   175.4
   6.8932    181(15)       0.00436     126.6   175.4
   6.8942    189(15)       0.00422     126.6   175.4
   6.8952    170(15)       0.00464     126.7   175.3
   6.8962    177(15)       0.00449     126.7   175.3
   6.8972    178(15)       0.00441     126.7   175.3
   6.8982    178(15)       0.00441     126.7   175.3
   6.8992    182(15)       0.00432     126.7   175.3
   6.9002    195(16)       0.00405     126.7   175.2
   6.9012    190(16)       0.00414     126.7   175.2
   6.9022    171(15)       0.00462     126.7   175.2
   6.9032    162(14)       0.00488     126.7   175.2
   6.9042    168(15)       0.00466     126.7   175.1
   6.9052    156(14)       0.00505     126.7   175.1
   6.9062    169(15)       0.00471     126.7   175.1
   6.9072    183(15)       0.00434     126.7   175.1
   6.9082    178(15)       0.00448     126.7   175.1
   6.9092    167(15)       0.00469     126.7   175.0
   6.9102    177(15)       0.00446     126.7   175.0
   6.9112    178(15)       0.00441     126.7   175.0
   6.9122    179(15)       0.00443     126.7   175.0
   6.9132    186(15)       0.00424     126.7   174.9
   6.9142    176(15)       0.00448     126.7   174.9
   6.9152    183(15)       0.00427     126.7   174.9
   6.9162    189(16)       0.00415     126.7   174.9
   6.9172    202(16)       0.00389     126.7   174.9
   6.9182    187(15)       0.00422     126.7   174.8
   6.9192    186(15)       0.00424     126.7   174.8
   6.9202    170(15)       0.00467     126.7   174.8
   6.9212    170(15)       0.00468     126.7   174.8
   6.9222    174(15)       0.00455     126.7   174.7
   6.9232    192(16)       0.00410     126.7   174.7
   6.9242    186(15)       0.00421     126.7   174.7
   6.9252    181(15)       0.00433     126.8   174.7
   6.9262    190(16)       0.00413     126.8   174.7
   6.9272    186(15)       0.00423     126.8   174.6
   6.9282    155(14)       0.00507     126.8   174.6
   6.9292    173(15)       0.00456     126.8   174.7
   6.9302    167(14)       0.00476     126.8   174.7
   6.9312    193(16)       0.00408     126.8   174.7
   6.9322    194(16)       0.00403     126.8   174.7
   6.9332    198(16)       0.00395     126.8   174.7
   6.9342    162(14)       0.00490     126.8   174.7
   6.9352    189(15)       0.00420     126.8   174.6
   6.9362    198(16)       0.00398     126.8   174.6
   6.9372    183(15)       0.00431     126.8   174.6
   6.9382    212(16)       0.00369     126.8   174.6
   6.9392    178(15)       0.00448     126.8   174.6
   6.9402    169(15)       0.00469     126.8   174.6
   6.9412    160(14)       0.00495     126.8   174.5
   6.9422    189(15)       0.00418     126.8   175.6
   6.9432    190(15)       0.00417     126.8   175.6
   6.9442    183(15)       0.00431     126.8   175.6
   6.9452    170(15)       0.00462     126.8   175.6
   6.9462    171(15)       0.00461     126.8   175.7
   6.9472    177(15)       0.00448     126.8   175.7
   6.9482    184(15)       0.00429     126.8   175.7
   6.9492    179(15)       0.00444     126.8   175.7
   6.9502    213(16)       0.00369     126.8   175.8
   6.9512    171(15)       0.00458     126.8   175.8
   6.9522    188(15)       0.00420     126.8   175.8
   6.9532    180(15)       0.00438     126.8   175.9
   6.9542    195(16)       0.00407     126.8   175.9
   6.9552    184(15)       0.00428     126.9   176.0
   6.9562    205(16)       0.00380     126.9   176.0
   6.9572    174(15)       0.00453     126.9   176.6
   6.9582    176(15)       0.00451     126.9   176.7
   6.9592    177(15)       0.00446     126.9   176.8
   6.9602    185(15)       0.00421     126.9   176.8
   6.9612    190(16)       0.00410     126.9   176.9
   6.9622    192(16)       0.00410     126.9   177.0
   6.9632    196(16)       0.00400     126.9   177.1
   6.9642    166(15)       0.00472     126.9   177.2
   6.9652    171(15)       0.00463     126.9   177.4
   6.9662    193(16)       0.00407     126.9   177.5
   6.9672    178(15)       0.00442     126.9   177.6
   6.9682    163(14)       0.00485     126.9   177.8
   6.9692    160(14)       0.00491     126.9   177.9
   6.9702    163(14)       0.00481     126.9   178.1
   6.9712    154(14)       0.00509     126.9   178.3
   6.9722    192(16)       0.00412     126.9   178.5
   6.9732    188(15)       0.00420     126.9   178.7
   6.9742    163(14)       0.00483     126.9   179.0
   6.9752    190(16)       0.00415     126.9   179.3
   6.9762    181(15)       0.00434     126.9   179.5
   6.9772    181(15)       0.00433     126.9   179.9
   6.9782    181(15)       0.00430     126.9   180.2
   6.9792    181(15)       0.00436     126.9   180.6
   6.9802    195(16)       0.00404     126.9   181.0
   6.9812    177(15)       0.00446     126.9   181.5
   6.9822    177(15)       0.00448     126.9   182.0
   6.9832    208(16)       0.00377     126.9   182.6
   6.9842    210(16)       0.00376     127.0   183.3
   6.9852    184(15)       0.00431     127.0   184.1
   6.9862    208(16)       0.00381     127.0   184.9
   6.9872    201(16)       0.00394     127.0   185.9
   6.9882    187(15)       0.00420     127.0   187.1
   6.9892    212(16)       0.00373     127.0   188.5
   6.9902    228(17)       0.003464    127.0   190.3
   6.9912    236(17)       0.003350    127.0   192.7
   6.9922    220(17)       0.00358     127.0   196.2
   6.9932    228(17)       0.003449    127.0   201.5
   6.9942    211(16)       0.00374     127.0   209.8
   6.9952    262(18)       0.003045    127.0   222.5
   6.9962    282(19)       0.002782    127.0   240.6
   6.9972    292(19)       0.002708    127.0   264.8
   6.9982    327(20)       0.002418    127.0   293.9
   6.9992    380(22)       0.002064    127.0   325.0
   7.0002    444(24)       0.001785    127.0   352.9
   7.0012    489(25)       0.001608    127.0   370.6
   7.0022    471(25)       0.001661    127.0   373.5
   7.0032    482(25)       0.001631    127.0   362.6
   7.0042    379(22)       0.002103    127.0   346.1
   7.0052    333(21)       0.002371    127.0   333.7
   7.0062    365(22)       0.002158    127.0   336.5
   7.0072    345(21)       0.002295    127.0   367.8
   7.0082    365(21)       0.002175    127.0   443.8
   7.0092    506(25)       0.001562    127.0   581.3
   7.0102    605(28)       0.001308    127.0   790.2
   7.0112    844(33)       0.000937    127.0   1063.2
   7.0122    1203(39)      0.000655    127.    1365.
   7.0132    1614(45)      0.000489    127.    1628.
   7.0142    1921(49)      0.000409    127.    1764.
   7.0152    2037(51)      0.000386    127.    1712.
   7.0162    1688(46)      0.000467    127.    1497.
   7.0172    1204(39)      0.000655    127.    1204.
   7.0182    854(33)       0.000925    127.1   913.0
   7.0192    627(28)       0.001259    127.1   673.2
   7.0202    515(26)       0.001535    127.1   504.1
   7.0212    409(23)       0.001929    127.1   403.8
   7.0222    352(21)       0.002234    127.1   360.1
   7.0232    366(22)       0.002148    127.1   360.2
   7.0242    388(22)       0.002041    127.1   395.2
   7.0252    423(23)       0.001868    127.1   458.5
   7.0262    481(25)       0.001632    127.1   543.0
   7.0272    533(26)       0.001480    127.1   636.2
   7.0282    644(29)       0.001225    127.1   719.3
   7.0292    725(30)       0.001084    127.1   767.2
   7.0302    759(31)       0.001036    127.1   760.5
   7.0312    713(30)       0.001104    127.1   700.4
   7.0322    586(27)       0.001342    127.1   608.1
   7.0332    452(24)       0.001738    127.1   507.5
   7.0342    394(22)       0.002006    127.1   415.8
   7.0352    298(19)       0.002634    127.1   341.8
   7.0362    282(19)       0.002788    127.1   287.9
   7.0372    252(18)       0.003134    127.1   251.8
   7.0382    233(17)       0.003380    127.1   229.2
   7.0392    208(16)       0.00377     127.1   215.4
   7.0402    220(17)       0.00356     127.1   207.0
   7.0412    212(16)       0.00371     127.1   201.7
   7.0422    197(16)       0.00399     127.1   198.0
   7.0432    198(16)       0.00398     127.1   195.3
   7.0442    206(16)       0.00382     127.2   193.2
   7.0452    196(16)       0.00399     127.2   191.4
   7.0462    185(15)       0.00422     127.2   189.9
   7.0472    188(15)       0.00419     127.2   188.7
   7.0482    237(17)       0.003345    127.2   187.7
   7.0492    219(17)       0.00364     127.2   186.9
   7.0502    202(16)       0.00390     127.2   186.2
   7.0512    193(16)       0.00412     127.2   185.6
   7.0522    208(16)       0.00380     127.2   185.2
   7.0532    187(15)       0.00423     127.2   184.8
   7.0542    198(16)       0.00396     127.2   184.6
   7.0552    212(16)       0.00369     127.2   184.5
   7.0562    190(15)       0.00418     127.2   184.6
   7.0572    215(16)       0.00368     127.2   184.7
   7.0582    219(17)       0.00358     127.2   185.0
   7.0592    202(16)       0.00390     127.2   185.5
   7.0602    197(16)       0.00399     127.2   186.1
   7.0612    199(16)       0.00397     127.2   187.1
   7.0622    208(16)       0.00380     127.2   188.4
   7.0632    204(16)       0.00386     127.2   190.4
   7.0642    195(16)       0.00402     127.2   193.7
   7.0652    208(16)       0.00379     127.2   199.1
   7.0662    250(18)       0.003150    127.2   208.5
   7.0672    259(18)       0.003049    127.2   224.4
   7.0682    268(18)       0.002948    127.2   249.7
   7.0692    317(20)       0.002484    127.2   287.2
   7.0702    338(21)       0.002327    127.2   337.8
   7.0712    397(22)       0.001983    127.2   399.4
   7.0722    517(26)       0.001522    127.2   465.0
   7.0732    583(27)       0.001350    127.2   522.1
   7.0742    620(28)       0.001271    127.3   554.3
   7.0752    632(28)       0.001245    127.3   549.3
   7.0762    620(28)       0.001264    127.3   509.2
   7.0772    502(25)       0.001563    127.3   448.4
   7.0782    408(23)       0.001928    127.3   382.6
   7.0792    359(21)       0.002198    127.3   322.9
   7.0802    253(18)       0.003107    127.3   275.1
   7.0812    244(18)       0.003233    127.3   240.5
   7.0822    242(18)       0.003262    127.3   217.5
   7.0832    268(18)       0.002953    127.3   203.3
   7.0842    208(16)       0.00380     127.3   194.6
   7.0852    199(16)       0.00396     127.3   189.5
   7.0862    208(16)       0.00376     127.3   186.3
   7.0872    191(16)       0.00411     127.3   184.1
   7.0882    187(15)       0.00422     127.3   182.5
   7.0892    175(15)       0.00453     127.3   181.2
   7.0902    197(16)       0.00405     127.3   180.2
   7.0912    175(15)       0.00455     127.3   179.3
   7.0922    191(16)       0.00416     127.3   178.6
   7.0932    187(15)       0.00425     127.3   177.9
   7.0942    189(15)       0.00418     127.3   177.4
   7.0952    185(15)       0.00427     127.3   176.9
   7.0962    182(15)       0.00433     127.3   176.5
   7.0972    175(15)       0.00449     127.3   175.3
   7.0982    207(16)       0.00381     127.3   174.9
   7.0992    194(16)       0.00407     127.3   174.7
   7.1002    196(16)       0.00403     127.3   174.4
   7.1012    187(15)       0.00417     127.3   174.2
   7.1022    203(16)       0.00387     127.3   173.9
   7.1032    184(15)       0.00426     127.3   173.7
   7.1042    161(14)       0.00490     127.4   173.6
   7.1052    201(16)       0.00393     127.4   173.4
   7.1062    190(16)       0.00414     127.4   173.2
   7.1072    156(14)       0.00502     127.4   173.1
   7.1082    182(15)       0.00432     127.4   173.0
   7.1092    165(15)       0.00470     127.4   172.8
   7.1102    201(16)       0.00390     127.4   172.7
   7.1112    174(15)       0.00456     127.4   172.6
   7.1122    163(14)       0.00486     127.4   172.1
   7.1132    203(16)       0.00385     127.4   172.0
   7.1142    174(15)       0.00455     127.4   171.9
   7.1152    158(14)       0.00500     127.4   171.9
   7.1162    188(15)       0.00422     127.4   171.8
   7.1172    184(15)       0.00431     127.4   171.7
   7.1182    183(15)       0.00435     127.4   171.7
   7.1192    159(14)       0.00500     127.4   171.6
   7.1202    171(15)       0.00457     127.4   171.5
   7.1212    191(16)       0.00409     127.4   171.5
   7.1222    190(16)       0.00413     127.4   171.4
   7.1232    169(15)       0.00467     127.4   171.4
   7.1242    177(15)       0.00444     127.4   171.3
   7.1252    182(15)       0.00430     127.4   171.3
   7.1262    186(15)       0.00425     127.4   171.2
   7.1272    183(15)       0.00432     127.4   171.2
   7.1282    195(16)       0.00406     127.4   171.1
   7.1292    160(14)       0.00493     127.4   171.1
   7.1302    201(16)       0.00391     127.4   171.1
   7.1312    187(15)       0.00422     127.4   171.0
   7.1322    192(16)       0.00413     127.4   171.0
   7.1332    183(15)       0.00435     127.4   170.9
   7.1342    182(15)       0.00432     127.4   170.9
   7.1352    183(15)       0.00430     127.5   170.9
   7.1362    197(16)       0.00401     127.5   170.8
   7.1372    194(16)       0.00407     127.5   170.8
   7.1382    181(15)       0.00433     127.5   170.8
   7.1392    193(16)       0.00411     127.5   170.7
   7.1402    155(14)       0.00510     127.5   170.7
   7.1412    173(15)       0.00454     127.5   170.7
   7.1422    177(15)       0.00442     127.5   170.6
   7.1432    182(15)       0.00433     127.5   170.6
   7.1442    159(14)       0.00499     127.5   170.6
   7.1452    161(14)       0.00491     127.5   170.5
   7.1462    171(15)       0.00460     127.5   170.5
   7.1472    200(16)       0.00392     127.5   170.5
   7.1482    219(17)       0.00362     127.5   170.4
   7.1492    189(16)       0.00415     127.5   170.4
   7.1502    190(16)       0.00413     127.5   170.4
   7.1512    178(15)       0.00442     127.5   170.4
   7.1522    187(15)       0.00424     127.5   170.3
   7.1532    163(14)       0.00487     127.5   170.3
   7.1542    182(15)       0.00436     127.5   170.3
   7.1552    167(15)       0.00470     127.5   170.2
   7.1562    182(15)       0.00434     127.5   170.2
   7.1572    182(15)       0.00434     127.5   169.9
   7.1582    208(16)       0.00378     127.5   169.9
   7.1592    183(15)       0.00430     127.5   169.9
   7.1602    182(15)       0.00433     127.5   169.9
   7.1612    158(14)       0.00503     127.5   169.8
   7.1622    173(15)       0.00457     127.5   169.8
   7.1632    181(15)       0.00435     127.5   169.8
   7.1642    192(16)       0.00411     127.5   169.8
   7.1652    178(15)       0.00442     127.6   169.8
   7.1662    184(15)       0.00427     127.6   169.7
   7.1672    201(16)       0.00395     127.6   169.7
   7.1682    172(15)       0.00460     127.6   169.7
   7.1692    204(16)       0.00389     127.6   169.7
   7.1702    179(15)       0.00440     127.6   169.7
   7.1712    195(16)       0.00402     127.6   169.6
   7.1722    193(16)       0.00407     127.6   169.6
   7.1732    164(14)       0.00478     127.6   169.6
   7.1742    192(16)       0.00411     127.6   169.6
   7.1752    185(15)       0.00428     127.6   169.6
   7.1762    175(15)       0.00452     127.6   169.6
   7.1772    196(16)       0.00400     127.6   169.5
   7.1782    189(15)       0.00418     127.6   169.5
   7.1792    186(15)       0.00424     127.6   169.5
   7.1802    181(15)       0.00434     127.6   169.5
   7.1812    184(15)       0.00430     127.6   169.5
   7.1822    173(15)       0.00458     127.6   169.4
   7.1832    172(15)       0.00458     127.6   169.4
   7.1842    184(15)       0.00427     127.6   169.4
   7.1852    161(14)       0.00491     127.6   169.4
   7.1862    165(14)       0.00476     127.6   169.4
   7.1872    193(16)       0.00410     127.6   169.3
   7.1882    179(15)       0.00445     127.6   169.3
   7.1892    182(15)       0.00436     127.6   169.3
   7.1902    156(14)       0.00511     127.6   169.3
   7.1912    176(15)       0.00444     127.6   169.3
   7.1922    186(15)       0.00426     127.6   169.2
   7.1932    184(15)       0.00430     127.6   169.2
   7.1942    201(16)       0.00390     127.6   169.2
   7.1952    176(15)       0.00446     127.6   169.2
   7.1962    182(15)       0.00434     127.7   169.2
   7.1972    199(16)       0.00395     127.7   169.1
   7.1982    178(15)       0.00443     127.7   169.1
   7.1992    190(16)       0.00415     127.7   169.1
   7.2002    167(14)       0.00478     127.7   169.1
   7.2012    169(15)       0.00465     127.7   169.1
   7.2022    198(16)       0.00398     127.7   169.0
   7.2032    198(16)       0.00398     127.7   169.0
   7.2042    162(14)       0.00487     127.7   169.0
   7.2052    158(14)       0.00505     127.7   169.0
   7.2062    179(15)       0.00441     127.7   169.0
   7.2072    171(15)       0.00462     127.7   169.0
   7.2082    186(15)       0.00423     127.7   168.9
   7.2092    183(15)       0.00431     127.7   168.9
   7.2102    173(15)       0.00455     127.7   168.9
   7.2112    193(16)       0.00408     127.7   168.9
   7.2122    182(15)       0.00432     127.7   168.9
   7.2132    159(14)       0.00497     127.7   168.8
   7.2142    149(14)       0.00539     127.7   168.8
   7.2152    171(15)       0.00462     127.7   168.8
   7.2162    201(16)       0.00394     127.7   168.8
   7.2172    174(15)       0.00455     127.7   171.9
   7.2182    156(14)       0.00507     127.7   171.9
   7.2192    207(16)       0.00383     127.7   172.0
   7.2202    182(15)       0.00433     127.7   172.1
   7.2212    158(14)       0.00501     127.7   172.1
   7.2222    153(14)       0.00515     127.7   172.2
   7.2232    162(14)       0.00484     127.7   172.3
   7.2242    177(15)       0.00444     127.7   172.4
   7.2252    191(16)       0.00411     127.7   172.5
   7.2262    194(16)       0.00404     127.7   172.6
   7.2272    203(16)       0.00388     127.8   172.7
   7.2282    187(15)       0.00421     127.8   172.8
   7.2292    176(15)       0.00445     127.8   173.0
   7.2302    197(16)       0.00400     127.8   173.1
   7.2312    187(15)       0.00419     127.8   173.2
   7.2322    199(16)       0.00393     127.8   173.4
   7.2332    191(16)       0.00410     127.8   173.6
   7.2342    185(15)       0.00427     127.8   173.7
   7.2352    186(15)       0.00424     127.8   173.9
   7.2362    170(15)       0.00461     127.8   174.1
   7.2372    178(15)       0.00438     127.8   174.3
   7.2382    197(16)       0.00400     127.8   174.5
   7.2392    199(16)       0.00399     127.8   174.7
   7.2402    193(16)       0.00413     127.8   175.0
   7.2412    175(15)       0.00452     127.8   175.2
   7.2422    199(16)       0.00392     127.8   175.5
   7.2432    188(15)       0.00419     127.8   175.8
   7.2442    205(16)       0.00386     127.8   176.1
   7.2452    203(16)       0.00388     127.8   176.4
   7.2462    204(16)       0.00385     127.8   176.8
   7.2472    176(15)       0.00449     127.8   177.2
   7.2482    169(15)       0.00464     127.8   177.8
   7.2492    195(16)       0.00405     127.8   178.2
   7.2502    191(16)       0.00415     127.8   178.7
   7.2512    164(14)       0.00481     127.8   179.3
   7.2522    209(16)       0.00378     127.8   179.9
   7.2532    212(16)       0.00372     127.8   180.5
   7.2542    162(14)       0.00483     127.8   181.2
   7.2552    210(16)       0.00375     127.8   181.9
   7.2562    198(16)       0.00401     127.8   182.7
   7.2572    188(15)       0.00417     127.8   183.6
   7.2582    200(16)       0.00394     127.9   184.6
   7.2592    202(16)       0.00390     127.9   185.7
   7.2602    192(16)       0.00414     127.9   186.9
   7.2612    214(16)       0.00371     127.9   188.2
   7.2622    208(16)       0.00381     127.9   189.7
   7.2632    233(17)       0.003390    127.9   191.3
   7.2642    205(16)       0.00384     127.9   193.1
   7.2652    198(16)       0.00396     127.9   195.2
   7.2662    203(16)       0.00390     127.9   197.5
   7.2672    211(16)       0.00376     127.9   200.2
   7.2682    233(17)       0.003393    127.9   203.2
   7.2692    195(16)       0.00403     127.9   206.6
   7.2702    198(16)       0.00399     127.9   210.6
   7.2712    231(17)       0.003438    127.9   215.2
   7.2722    246(18)       0.003209    127.9   220.6
   7.2732    249(18)       0.003163    127.9   226.9
   7.2742    267(18)       0.002928    127.9   234.6
   7.2752    281(19)       0.002805    127.9   243.8
   7.2762    317(20)       0.002476    127.9   255.5
   7.2772    314(20)       0.002519    127.9   270.9
   7.2782    347(21)       0.002282    127.9   292.9
   7.2792    397(22)       0.001997    127.9   327.3
   7.2802    464(24)       0.001695    127.9   384.2
   7.2812    547(26)       0.001440    127.9   480.5
   7.2822    690(30)       0.001147    127.9   639.6
   7.2832    958(35)       0.000827    127.9   888.4
   7.2842    1222(39)      0.000648    128.    1247.
   7.2852    1652(46)      0.000479    128.    1719.
   7.2862    2228(53)      0.000353    128.    2273.
   7.2872    2834(60)      0.0002784   128.    2835.
   7.2882    3390(66)      0.0002318   128.    3282.
   7.2892    3531(67)      0.0002228   128.    3474.
   7.2902    3268(64)      0.0002405   128.    3333.
   7.2912    2819(60)      0.0002793   128.    2918.
   7.2922    2150(52)      0.000366    128.    2365.
   7.2932    1599(45)      0.000493    128.    1804.
   7.2942    1256(40)      0.000629    128.    1316.
   7.2952    898(34)       0.000881    128.0   938.3
   7.2962    707(30)       0.001116    128.0   673.2
   7.2972    579(27)       0.001363    128.0   501.7
   7.2982    450(24)       0.001759    128.0   397.2
   7.2992    409(23)       0.001920    128.0   335.5
   7.3002    341(21)       0.002315    128.0   298.5
   7.3012    324(20)       0.002424    128.0   275.2
   7.3022    284(19)       0.002768    128.0   259.2
   7.3032    278(19)       0.002843    128.0   247.3
   7.3042    270(18)       0.002932    128.0   238.0
   7.3052    255(18)       0.003099    128.0   230.6
   7.3062    258(18)       0.003059    128.0   224.5
   7.3072    215(16)       0.00369     128.0   219.5
   7.3082    229(17)       0.003444    128.0   215.5
   7.3092    243(18)       0.003247    128.0   212.5
   7.3102    226(17)       0.003502    128.0   210.5
   7.3112    226(17)       0.003481    128.0   210.0
   7.3122    240(17)       0.003281    128.0   211.9
   7.3132    234(17)       0.003367    128.0   217.6
   7.3142    215(16)       0.00369     128.0   229.1
   7.3152    226(17)       0.003482    128.0   248.2
   7.3162    259(18)       0.003047    128.0   276.0
   7.3172    289(19)       0.002718    128.0   311.1
   7.3182    292(19)       0.002697    128.0   348.6
   7.3192    338(21)       0.002324    128.0   380.2
   7.3202    354(21)       0.002221    128.1   394.9
   7.3212    353(21)       0.002225    128.1   385.8
   7.3222    323(20)       0.002426    128.1   356.7
   7.3232    310(20)       0.002533    128.1   317.8
   7.3242    256(18)       0.003085    128.1   278.9
   7.3252    222(17)       0.00355     128.1   246.0
   7.3262    224(17)       0.003478    128.1   221.4
   7.3272    201(16)       0.00391     128.1   204.9
   7.3282    199(16)       0.00395     128.1   194.6
   7.3292    226(17)       0.003488    128.1   188.5
   7.3302    199(16)       0.00400     128.1   184.8
   7.3312    195(16)       0.00408     128.1   182.5
   7.3322    181(15)       0.00434     128.1   180.9
   7.3332    180(15)       0.00440     128.1   179.6
   7.3342    199(16)       0.00399     128.1   178.6
   7.3352    188(15)       0.00422     128.1   177.7
   7.3362    190(15)       0.00417     128.1   177.0
   7.3372    196(16)       0.00404     128.1   176.3
   7.3382    180(15)       0.00439     128.1   175.7
   7.3392    198(16)       0.00402     128.1   175.1
   7.3402    206(16)       0.00383     128.1   174.7
   7.3412    183(15)       0.00431     128.1   174.2
   7.3422    188(15)       0.00419     128.1   173.8
   7.3432    183(15)       0.00432     128.1   173.4
   7.3442    172(15)       0.00460     128.1   173.1
   7.3452    188(15)       0.00419     128.1   172.8
   7.3462    168(15)       0.00475     128.1   172.5
   7.3472    170(15)       0.00465     128.1   172.2
   7.3482    197(16)       0.00401     128.1   171.9
   7.3492    166(15)       0.00475     128.1   171.7
   7.3502    152(14)       0.00520     128.1   171.5
   7.3512    158(14)       0.00501     128.2   171.2
   7.3522    189(15)       0.00420     128.2   171.0
   7.3532    179(15)       0.00446     128.2   170.8
   7.3542    170(15)       0.00467     128.2   170.7
   7.3552    183(15)       0.00431     128.2   170.5
   7.3562    183(15)       0.00431     128.2   170.3
   7.3572    183(15)       0.00429     128.2   170.2
   7.3582    204(16)       0.00384     128.2   170.0
   7.3592    191(16)       0.00414     128.2   169.9
   7.3602    165(14)       0.00482     128.2   169.7
   7.3612    165(14)       0.00482     128.2   169.6
   7.3622    169(15)       0.00469     128.2   169.5
   7.3632    163(14)       0.00483     128.2   169.3
   7.3642    177(15)       0.00447     128.2   169.2
   7.3652    202(16)       0.00391     128.2   169.1
   7.3662    166(14)       0.00480     128.2   169.0
   7.3672    178(15)       0.00442     128.2   168.9
   7.3682    161(14)       0.00490     128.2   168.8
   7.3692    156(14)       0.00504     128.2   168.7
   7.3702    161(14)       0.00493     128.2   168.6
   7.3712    175(15)       0.00449     128.2   168.5
   7.3722    204(16)       0.00383     128.2   166.1
   7.3732    172(15)       0.00459     128.2   166.0
   7.3742    174(15)       0.00457     128.2   166.0
   7.3752    170(15)       0.00467     128.2   166.0
   7.3762    163(14)       0.00484     128.2   166.0
   7.3772    185(15)       0.00422     128.2   165.9
   7.3782    187(15)       0.00419     128.2   165.9
   7.3792    162(14)       0.00489     128.2   165.9
   7.3802    188(15)       0.00417     128.2   165.8
   7.3812    169(15)       0.00468     128.2   165.8
   7.3822    176(15)       0.00449     128.2   165.8
   7.3832    155(14)       0.00511     128.3   165.8
   7.3842    168(15)       0.00471     128.3   165.7
   7.3852    183(15)       0.00434     128.3   165.7
   7.3862    183(15)       0.00432     128.3   165.7
   7.3872    188(16)       0.00415     128.3   165.7
   7.3882    168(15)       0.00468     128.3   165.6
   7.3892    176(15)       0.00444     128.3   165.6
   7.3902    175(15)       0.00452     128.3   165.6
   7.3912    189(15)       0.00421     128.3   165.6
   7.3922    172(15)       0.00459     128.3   165.5
   7.3932    160(14)       0.00498     128.3   165.5
   7.3942    168(15)       0.00471     128.3   165.5
   7.3952    159(14)       0.00492     128.3   165.5
   7.3962    164(14)       0.00480     128.3   165.4
   7.3972    174(15)       0.00452     128.3   165.4
   7.3982    168(15)       0.00474     128.3   165.4
   7.3992    180(15)       0.00443     128.3   165.4
   7.4002    159(14)       0.00501     128.3   165.3
   7.4012    172(15)       0.00455     128.3   165.3
   7.4022    192(16)       0.00411     128.3   165.3
   7.4032    172(15)       0.00465     128.3   165.2
   7.4042    179(15)       0.00441     128.3   165.1
   7.4052    151(14)       0.00526     128.3   165.1
   7.4062    178(15)       0.00442     128.3   165.1
   7.4072    190(16)       0.00415     128.3   165.1
   7.4082    160(14)       0.00494     128.3   165.1
   7.4092    157(14)       0.00504     128.3   165.0
   7.4102    162(14)       0.00491     128.3   165.0
   7.4112    183(15)       0.00428     128.3   165.0
   7.4122    168(15)       0.00471     128.3   165.2
   7.4132    174(15)       0.00454     128.3   165.2
   7.4142    187(15)       0.00422     128.4   165.2
   7.4152    167(15)       0.00474     128.4   165.2
   7.4162    163(14)       0.00486     128.4   165.2
   7.4172    175(15)       0.00448     128.4   165.2
   7.4182    173(15)       0.00454     128.4   165.2
   7.4192    179(15)       0.00441     128.4   165.1
   7.4202    179(15)       0.00440     128.4   165.1
   7.4212    171(15)       0.00460     128.4   165.1
   7.4222    182(15)       0.00434     128.4   165.1
   7.4232    180(15)       0.00441     128.4   165.1
   7.4242    180(15)       0.00436     128.4   165.4
   7.4252    176(15)       0.00446     128.4   165.4
   7.4262    179(15)       0.00438     128.4   165.4
   7.4272    169(15)       0.00468     128.4   165.4
   7.4282    172(15)       0.00460     128.4   165.4
   7.4292    174(15)       0.00456     128.4   165.4
   7.4302    142(13)       0.00556     128.4   165.4
   7.4312    163(14)       0.00481     128.4   165.4
   7.4322    174(15)       0.00454     128.4   165.4
   7.4332    176(15)       0.00451     128.4   165.4
   7.4342    153(14)       0.00520     128.4   165.4
   7.4352    197(16)       0.00399     128.4   165.4
   7.4362    203(16)       0.00389     128.4   165.4
   7.4372    182(15)       0.00438     128.4   165.4
   7.4382    181(15)       0.00437     128.4   165.5
   7.4392    174(15)       0.00453     128.4   165.5
   7.4402    148(14)       0.00534     128.4   165.5
   7.4412    190(16)       0.00415     128.4   165.5
   7.4422    191(16)       0.00413     128.4   165.6
   7.4432    182(15)       0.00432     128.4   165.6
   7.4442    165(14)       0.00479     128.4   165.6
   7.4452    170(15)       0.00471     128.4   165.7
   7.4462    191(16)       0.00411     128.5   165.7
   7.4472    167(15)       0.00473     128.5   165.8
   7.4482    145(13)       0.00552     128.5   165.8
   7.4492    160(14)       0.00494     128.5   165.9
   7.4502    167(15)       0.00473     128.5   166.0
   7.4512    182(15)       0.00433     128.5   166.0
   7.4522    190(15)       0.00417     128.5   168.3
   7.4532    171(15)       0.00461     128.5   168.5
   7.4542    157(14)       0.00505     128.5   168.7
   7.4552    147(14)       0.00538     128.5   168.8
   7.4562    154(14)       0.00513     128.5   169.0
   7.4572    169(15)       0.00464     128.5   169.3
   7.4582    200(16)       0.00395     128.5   169.5
   7.4592    189(15)       0.00422     128.5   169.8
   7.4602    149(14)       0.00533     128.5   170.0
   7.4612    158(14)       0.00501     128.5   170.4
   7.4622    174(15)       0.00457     128.5   170.7
   7.4632    203(16)       0.00390     128.5   171.1
   7.4642    176(15)       0.00449     128.5   171.5
   7.4652    165(14)       0.00479     128.5   172.0
   7.4662    175(15)       0.00455     128.5   172.6
   7.4672    184(15)       0.00428     128.5   173.2
   7.4682    176(15)       0.00448     128.5   174.0
   7.4692    208(16)       0.00378     128.5   174.8
   7.4702    194(16)       0.00406     128.5   175.8
   7.4712    188(16)       0.00415     128.5   177.1
   7.4722    188(15)       0.00423     128.5   178.7
   7.4732    211(16)       0.00376     128.5   181.0
   7.4742    185(15)       0.00430     128.5   184.4
   7.4752    196(16)       0.00403     128.5   189.8
   7.4762    224(17)       0.00352     128.5   198.4
   7.4772    220(17)       0.00359     128.5   211.9
   7.4782    246(18)       0.003204    128.6   231.9
   7.4792    263(18)       0.003010    128.6   259.5
   7.4802    284(19)       0.002761    128.6   294.6
   7.4812    307(20)       0.002561    128.6   335.3
   7.4822    409(23)       0.001926    128.6   375.3
   7.4832    441(24)       0.001778    128.6   407.0
   7.4842    483(25)       0.001627    128.6   421.4
   7.4852    418(23)       0.001895    128.6   413.8
   7.4862    381(22)       0.002069    128.6   388.3
   7.4872    341(21)       0.002314    128.6   354.8
   7.4882    312(20)       0.002544    128.6   323.1
   7.4892    323(20)       0.002447    128.6   301.4
   7.4902    282(19)       0.002791    128.6   295.9
   7.4912    281(19)       0.002805    128.6   310.4
   7.4922    310(20)       0.002553    128.6   345.4
   7.4932    377(22)       0.002093    128.6   397.2
   7.4942    473(25)       0.001665    128.6   456.1
   7.4952    534(26)       0.001485    128.6   506.5
   7.4962    543(26)       0.001446    128.6   529.8
   7.4972    532(26)       0.001480    128.6   514.9
   7.4982    444(24)       0.001780    128.6   467.9
   7.4992    357(21)       0.002205    128.6   406.1
   7.5002    296(19)       0.002662    128.6   345.4
   7.5012    258(18)       0.003052    128.6   294.9
   7.5022    277(19)       0.002839    128.6   258.6
   7.5032    248(18)       0.003195    128.6   235.4
   7.5042    237(17)       0.003333    128.6   222.6
   7.5052    220(17)       0.00360     128.6   216.7
   7.5062    233(17)       0.003384    128.6   215.0
   7.5072    229(17)       0.003449    128.6   216.0
   7.5082    217(17)       0.00363     128.6   218.7
   7.5092    205(16)       0.00383     128.6   222.8
   7.5102    222(17)       0.00355     128.7   228.6
   7.5112    253(18)       0.003107    128.7   236.3
   7.5122    269(18)       0.002949    128.7   247.2
   7.5132    256(18)       0.003089    128.7   263.3
   7.5142    309(20)       0.002542    128.7   289.3
   7.5152    361(21)       0.002192    128.7   333.0
   7.5162    399(23)       0.001969    128.7   407.5
   7.5172    480(25)       0.001635    128.7   530.3
   7.5182    639(28)       0.001244    128.7   720.6
   7.5192    885(33)       0.000894    128.7   992.1
   7.5202    1154(38)      0.000686    129.    1344.
   7.5212    1555(44)      0.000507    129.    1748.
   7.5222    1963(50)      0.000401    129.    2146.
   7.5232    2316(54)      0.0003400   129.    2445.
   7.5242    2474(56)      0.0003182   129.    2543.
   7.5252    2297(54)      0.0003434   129.    2402.
   7.5262    2054(51)      0.000383    129.    2077.
   7.5272    1515(44)      0.000523    129.    1672.
   7.5282    1070(37)      0.000734    129.    1274.
   7.5292    825(32)       0.000955    128.7   936.5
   7.5302    621(28)       0.001278    128.7   680.6
   7.5312    476(25)       0.001654    128.7   504.3
   7.5322    419(23)       0.001873    128.7   392.2
   7.5332    339(21)       0.002334    128.7   324.9
   7.5342    302(20)       0.002601    128.7   285.7
   7.5352    263(18)       0.003016    128.7   262.4
   7.5362    270(18)       0.002932    128.7   247.9
   7.5372    262(18)       0.003003    128.7   238.3
   7.5382    230(17)       0.003432    128.7   231.6
   7.5392    211(16)       0.00374     128.7   227.0
   7.5402    214(16)       0.00369     128.7   224.2
   7.5412    205(16)       0.00386     128.7   223.4
   7.5422    251(18)       0.003134    128.8   225.2
   7.5432    220(17)       0.00359     128.8   231.1
   7.5442    238(17)       0.003319    128.8   243.3
   7.5452    238(17)       0.003321    128.8   265.2
   7.5462    288(19)       0.002737    128.8   300.5
   7.5472    300(19)       0.002644    128.8   352.2
   7.5482    366(21)       0.002165    128.8   421.2
   7.5492    429(23)       0.001833    128.8   504.1
   7.5502    506(25)       0.001551    128.8   591.7
   7.5512    575(27)       0.001365    128.8   668.1
   7.5522    589(27)       0.001331    128.8   712.8
   7.5532    572(27)       0.001380    128.8   709.7
   7.5542    531(26)       0.001489    128.8   659.8
[truncated: 2,214,718 more chars]
